# Supplementary material for: A protective personal factor against disability and dependence in the elderly: an ordinal regression analysis with nine geographically-defined samples from Spain
Source: Springer Nature journal article supplement (doi:10.1186/s12877-016-0409-9), 2017-01-31
Supplement: MOESM1 [file 12029886]

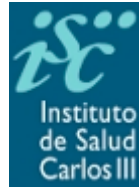

Centro Nacional de Epidemiología

# Estudio longitudinal del envejecimiento de poblaciones españolas

## Cuaderno A Examen Médico

Número de entrevista    00001

Código de provincia   00002

# Índice

---

|                                                                                        |    |
|----------------------------------------------------------------------------------------|----|
| <b>A. CONSENTIMIENTO INFORMADO</b>                                                     | 5  |
| <b>B. ANTECEDENTES PERSONALES</b>                                                      | 7  |
| <b>C. DATOS DE SALUD</b>                                                               | 8  |
| <b>I. Síntomas y molestias físicas</b>                                                 | 8  |
| <b>II. Estado mental geriátrico</b>                                                    | 10 |
| <i>II-1 Exploración Cognoscitiva</i>                                                   | 10 |
| <i>II-2 Exploración Psiquiátrica (GMS-B, HAS)</i>                                      | 15 |
| <i>II-3 Consideraciones Finales</i>                                                    | 22 |
| <i>II-4 Ítems observación del GMS</i>                                                  | 23 |
| <i>II-5 Fiabilidad</i>                                                                 | 26 |
| <i>II-6 Resumen Final</i>                                                              | 27 |
| <i>II-7 Diagnóstico Psiquiátrico</i>                                                   | 28 |
| <i>II-8 Diagnósticos GMS-HAS</i>                                                       | 28 |
| <b>III. Dolor</b>                                                                      | 29 |
| <b>D. EXAMEN FÍSICO</b>                                                                | 32 |
| <b>E. CRIBAJE NEUROLÓGICO</b>                                                          | 34 |
| <b>I. Cuestionario de síntomas</b>                                                     | 34 |
| <b>II. Tareas físicas</b>                                                              | 35 |
| <b>F. EXAMEN NEUROLÓGICO</b>                                                           | 36 |
| <b>I. Exploración neurológica</b>                                                      | 36 |
| <b>II. Exploración neurológica: Parkinsonismo</b>                                      | 39 |
| <b>G. MEDICACIÓN</b>                                                                   | 40 |
| <b>H. RESUMEN DE LA HISTORIA CLÍNICA Y UTILIZACIÓN DE SERVICIOS</b>                    | 44 |
| <b>I. ESCALA DE IMPACTO FUNCIONAL DE ENFERMEDADES POR ORGANOS, APARATOS O SISTEMAS</b> | 50 |
| <b>J. RECAPITULACIÓN DE ACTUALIDAD:<br/>(DIAGNOSTICOS, ESTADO DE SALUD Y CRIBAJES)</b> | 53 |

---

***A entregar a la persona entrevistada:***

Estimado/a Sr. / Sra.:

En estas pocas líneas el Grupo de Estudio Epidemiológico del Envejecimiento en España, organizador del estudio longitudinal del envejecimiento de poblaciones españolas quisiera expresarle su agradecimiento. Su participación en este estudio resultará de gran valor para conocer y mejorar las condiciones de salud de las personas mayores en España.

En este estudio Vd. recibirá la visita de un médico que le entrevistará sobre distintos aspectos de su salud. El doctor se interesará tanto por su salud actual como por su salud anterior y le propondrá alguna exploración sencilla a realizar en el momento.

En una segunda entrevista, un profesional sanitario –médico o no- le pedirá que refiera las dificultades que sus problemas de salud le suponen para llevar a cabo las actividades de la vida diaria y como afecta su salud a su bienestar.

El primer entrevistador le entregará, si Vd. lo desea, una hoja que contiene una breve información acerca del objetivo y contenido de este estudio.

Sin más, esperamos que le resulten agradables estos encuentros y le agradecemos muy atentamente su colaboración.

Muchas gracias

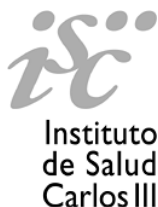

Ministerio de Sanidad y Consumo

*Centro Nacional de Epidemiología*  
**Grupo de estudios de envejecimiento**

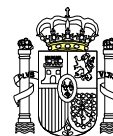

## INFORMACION A PARTICIPANTES EN ESTUDIO Y/O A FAMILIARES, ANTE COLABORACIÓN EN ESTUDIO DEL ENVEJECIMIENTO DE POBLACIONES ESPAÑOLAS

Una parte muy importante del estudio de la salud de poblaciones españolas lo constituye el estudio de la salud de los ancianos. Esto requiere el uso de métodos orientados a detectar la presencia de enfermedades crónicas, de discapacidad y también de la calidad de vida relacionada con la salud. El estudio en el que le proponemos participar es un estudio de envejecimiento que tiene como objetivo detectar la presencia de deterioro cognitivo o demencias en determinadas poblaciones españolas y poner a prueba la calidad de un cuestionario para estudio longitudinal del envejecimiento en nuestro país (comprensibilidad, duración del mismo, aceptabilidad, etc.). Para ello se realizarán, en el propio domicilio y en presencia de familiares o acompañantes si la situación lo requiere, dos entrevistas, una de ellas por médico y otra por personal sanitario. En estas entrevistas se determinará el estado de salud o la posible presencia de enfermedades sin diagnosticar utilizando cuestionarios, particularmente diseñados para conocer la discapacidad y calidad de vida y un breve examen clínico. También se deberán analizar informes o documentos médicos que obren en poder de la persona participante

La participación en este estudio no produce mas molestias que las de la dedicación de un tiempo a la realización de las entrevistas. Para las personas participantes este estudio puede permitir la identificación de enfermedades crónicas no diagnosticadas y tratables, por ejemplo la enfermedad de Parkinson o algunas demencias. También es posible que de dicho estudio no se derive ningún resultado concluyente o previamente no conocido acerca de la salud de la persona participante.

Toda la información obtenida se almacenará y tratará de forma confidencial, de acuerdo con las normas señaladas por la Agencia de Protección de datos y finalmente destruida. En el caso de que desee ser informado de los resultados individuales obtenidos en el estudio, estos serán comunicados - siguiendo sus instrucciones - a usted mismo, a su médico de familia o a sus familiares o representante legal

**Nota.** La información a enfermos requiere la integridad de sus facultades mentales, lo que suele ser poco frecuente para personas afectadas por demencia en cuyo caso la información se proporcionará a los familiares.

*Estimado colega, este es el examen médico del estudio longitudinal del envejecimiento de poblaciones españolas diseñado por el Grupo Español de Estudios Epidemiológicos del Envejecimiento. Este cuadernillo está diseñado para que Vd. lea los enunciados en voz alta al participante; los mensajes tabulados en cursiva están dirigidos a Vd. y por tanto no deben ser leídos en voz alta. Por favor lea atentamente las instrucciones correspondientes a cada sección.*

## A. CONSENTIMIENTO INFORMADO

### Código en caso de ausencia de respuesta:

*Por favor complete cada ítem con el número de opción o respuesta apropiados. En caso de ausencia de respuesta utilice el código 99 seguido de alguna de las especificaciones siguientes.*

- 1. No puede responder por trastorno cognitivo*
- 2. No puede hacerlo por limitaciones físicas*
- 3. Se niega*
- 4. No es apropiado*
- 5. Desconoce la respuesta*
- 6. Otro*

### o. Identificación de la persona entrevistada:

Nombre : \_\_\_\_\_ 00001  
Dirección postal: \_\_\_\_\_ 00002  
Código postal:      00003  
Teléfono para contactos  
posteriores: \_\_\_\_\_ 00004  
Fecha de la entrevista: \_\_\_\_\_ 00005

***A continuación se presentan cinco ítems dirigidos a la obtención del consentimiento informado de la persona entrevistada. Es indispensable obtener la firma de la persona entrevistada, o en su caso del familiar o persona responsable. Por favor valore las condiciones del entrevistado y decida sobre la conveniencia de solicitar el consentimiento al inicio o al término de la administración de este cuadernillo.***

He recibido información acerca del estudio longitudinal del envejecimiento de poblaciones españolas. En cualquier momento puedo interrumpir el examen, estudio o entrevista.

Estoy de acuerdo en:

1. Participar den el estudio longitudinal de envejecimiento de poblaciones españolas, que consta de dos entrevistas en las que se me realizarán preguntas y exámenes médicos relacionados con mi estado de salud.

- 1 Sí
- 2 No

|\_\_| 00102

2. Que el investigador pueda examinar mi historia clínica incluidas pruebas radiológicas, pruebas de laboratorio o cualquier información oportuna a este estudio y que permita que se desarrolle con la calidad más alta posible.

- 1 Sí
- 2 No

|\_\_| 00202

Médico de atención primaria o equivalente \_\_\_\_\_

**3. Que se contacte con el familiar o conocido detallado abajo para concertar la entrevista:**

- 1 Sí
- 2 No

|\_\_| 00301

00302 **3.a** Nombre: \_\_\_\_\_

00303 **3.b** Relación: \_\_\_\_\_

00304 **3.c** Dirección: \_\_\_\_\_

00305 **3.d** Número de teléfono: \_\_\_\_\_

**4. Yo (*el entrevistado*) he dado mi consentimiento personalmente.**

- 1 Por escrito
- 2 De forma verbal

|\_\_| 00401

Firma \_\_\_\_\_

**5. El consentimiento ha sido proporcionado por un familiar o amigo:**

- 1 Por escrito
- 2 De forma verbal

|\_\_| 00501

Firma \_\_\_\_\_

**Pedir a la persona entrevistada o a su familiar que facilite toda la documentación médica disponible. Tómese unos momentos para examinarla pues será necesaria durante la administración de este cuadernillo**

A continuación voy a plantearle unas preguntas para ver como se encuentra. No se preocupe si a veces tiene la impresión de que le estoy pidiendo que me cuente cosas parecidas. En primer lugar le haré algunas preguntas sobre su salud y por último le examinaré

## **B. ANTECEDENTES PERSONALES**

### **Código en caso de ausencia de respuesta:**

*Por favor complete cada ítem con el número de opción o respuesta apropiados. En caso de ausencia de respuesta utilice el código 99 seguido de alguna de las especificaciones siguientes.*

1. No puede responder por trastorno cognitivo
2. No puede hacerlo por limitaciones físicas
3. Se niega
4. No es apropiado
5. Desconoce la respuesta
6. Otro

En primer lugar me gustaría que me hablara de los problemas de salud que haya tenido a lo largo de su vida:

### **Enfermedades físicas**

---

---

---

---

---

### **Enfermedades mentales**

---

---

---

---

---

### Intervenciones quirúrgicas

---

---

---

---

---

### Medicaciones previas y otros tratamientos

---

---

---

---

---

### Otros aspectos

---

---

---

---

---

## C. DATOS DE SALUD

### I. Síntomas y molestias físicas

#### Código en caso de ausencia de respuesta:

*Por favor complete cada ítem con el número de opción o respuesta apropiados. En caso de ausencia de respuesta utilice el código 99 seguido de alguna de las especificaciones siguientes.*

1. No puede responder por trastorno cognitivo
2. No puede hacerlo por limitaciones físicas
3. Se niega
4. No es apropiado
5. Desconoce la respuesta
6. Otro



8. ¿Podría indicarme si ha padecido alguno de los siguientes síntomas en los últimos tres meses?

**Indicar las opciones que procedan; son posibles distintas alternativas. Compruebe la presencia de los síntomas haciendo uso de la siguiente lista.**

**Sección A**

- |                    |    |       |
|--------------------|----|-------|
| 1 Mal apetito      | __ | 00801 |
| 2 Adelgazamiento   | __ | 00802 |
| 3 Sobrepeso        | __ | 00803 |
| 4 Nauseas          | __ | 00804 |
| 5 Sequedad de boca | __ | 00805 |
| 6 Dolor de vientre | __ | 00806 |
| 7 Diarrea          | __ | 00807 |
| 8 Estreñimiento    | __ | 00808 |

**Sección B**

- |                            |    |       |
|----------------------------|----|-------|
| 1 Dificultades para orinar | __ | 00809 |
| 2 Incontinencia            | __ | 00810 |

**Sección C**

- |                                          |    |       |
|------------------------------------------|----|-------|
| 1 Dolor de cabeza                        | __ | 00811 |
| 2 Vértigo                                | __ | 00812 |
| 3 Sudoración                             | __ | 00813 |
| 4 Escalofrío, sensación de frío          | __ | 00814 |
| 5 Falta de aire, dificultad respiratoria | __ | 00815 |
| 6 Tos                                    | __ | 00816 |

**Sección D**

- |                                          |    |       |
|------------------------------------------|----|-------|
| 1 Pérdida de audición                    | __ | 00817 |
| 2 Pérdida de visión o molestias oculares | __ | 00818 |

**Sección E**

- |                                   |    |       |
|-----------------------------------|----|-------|
| 1 Dolor en la espalda             | __ | 00819 |
| 2 Dolor en el pecho               | __ | 00820 |
| 3 Dolor en las piernas            | __ | 00821 |
| 4 Molestias en las articulaciones | __ | 00822 |
| 5 Dificultades para caminar       | __ | 00823 |

**Sección F**

- |                                  |    |       |
|----------------------------------|----|-------|
| 1 Fatiga                         | __ | 00824 |
| 2 Dificultades para dormir       | __ | 00825 |
| 3 Dificultades para concentrarse | __ | 00826 |
| 4 Dificultades para relajarse    | __ | 00827 |
| 5 Agotamiento                    | __ | 00828 |
| 6 Inquietud motora               | __ | 00829 |

**Por favor anote el número de minutos invertido en la administración de esta sección** |\_\_\_\_\_| 00901

## II. Estado mental geriátrico

Muchas gracias. A continuación voy a preguntarle con mas detalles sobre su salud y sobre cómo se encuentra

### II-1 Exploración Cognoscitiva

#### I-1.1 Memoria

##### Código en caso de ausencia de respuesta:

Por favor complete cada ítem con el número de opción o respuesta apropiados. En caso de ausencia de respuesta utilice el código 99 seguido de alguna de las especificaciones siguientes.

1. No puede responder por trastorno cognitivo
2. No puede hacerlo por limitaciones físicas
3. Se niega
4. No es apropiado
5. Desconoce la respuesta
6. Otro

Para empezar, le voy a decir mi apellido y me gustaría que usted lo recordara.

***Repetir lentamente el apellido hasta su correcta repetición. Se permiten tres intentos. Se admiten fallos menores de pronunciación***

10. Mi apellido es ... ¿puede repetírmelo?

- 1 Repetición correcta
- 2 No puede repetirlo

|\_\_| 01001

***Fijándose en la información reflejada en los documentos médicos de la persona entrevistada, realice la siguiente pregunta repitiendo los datos, por ejemplo:***

Veo que tiene/ha tenido algún problema/s de ..., etc. Por todos ellos le voy a ir preguntando. Veo que también ha tenido problemas de ...

11. *En caso positivo, ¿le ha afectado la memoria?*

*En caso negativo, veo que recuerda bien los datos, ¿conserva bien la memoria?*

- 1 Sí
- 2 No

|\_\_| 01101

12. *Si responde que tiene problemas: ¿supone ello un problema para Vd.?*

- 1 Sí
- 2 No

|\_\_| 01201

13. *¿Ha tenido recientemente tendencia a olvidar cosas? (¿De qué tipo de cosas se olvida Vd.?) (¿De los nombres de sus familiares o amigos próximos?) (¿De dónde ha dejado las cosas?)*

**En caso negativo pasar a la pregunta 15**

- 1 No olvidos
- 2 Olvida los nombres de familiares o amigos, o los confunde (no se incluyen errores pasajeros)
- 3 Olvida dónde ha dejado las cosas
- 4 Olvida ambas cosas |\_\_| 01301

**14. Aproximadamente, ¿cuándo comenzó a notarlo?:**

- 1 Ocurrió por primera vez durante los últimos 1-2 años
- 2 Ocurrió por primera vez durante los últimos 3-4 años
- 3 Ocurrió por primera vez durante los últimos 5-10 años
- 4 Ocurrió por primera vez hace más de 10 años |\_\_| 01401

**15. ¿Recuerda mi apellido, se lo dije al principio?, ¿cuál es?**

- 1 Lo recuerda perfectamente
- 2 No recuerda correctamente el nombre del entrevistador  
(se permiten errores mínimos de pronunciación) |\_\_| 01501

**16. Por cierto, ¿me conocía a mí anteriormente, me ha visto Vd. antes? Si no está seguro ¿me ha visto en la última semana? En caso afirmativo: ¿cuándo? ¿dónde? ¿cómo fue? ¿qué estaba haciendo? ¿qué llevaba puesto? ¿qué hicimos juntos? ¿qué le dije?**

- 1 No confabula
- 2 Da una respuesta positiva y una explicación sencilla dentro de los límites de sus posibilidades, pero el entrevistador sabe que es incorrecto, p. ej.: "Vd. fue el doctor que me examinó ayer".
- 3 Confabulación |\_\_| 01601

**1. Observación: Habla divagando, pero las ideas están razonablemente bien formadas**

- 1 Sí
- 2 No |\_\_| 01701

**2. Ahora tengo que hacerle una pregunta sencilla, ¿cómo se llama el Presidente del Gobierno?**

- 1 Bien
- 2 No recuerda el nombre del Presidente del Gobierno |\_\_| 01801

***Si lo dice mal decir:*** Bien, en realidad se llama...

**3. ¿Quién fue el anterior Presidente del Gobierno?**

- 1 Bien
- 2 No recuerda el nombre del anterior Presidente del Gobierno |\_\_| 01901

**4. Observación: En opinión del entrevistador, el entrevistado tiene dificultades con su memoria**

- 1 Sí
- 2 No |\_\_| 02001

**I-1.2 Orientación**

**21. También hablando de la memoria: ¿Recuerda en qué año nació?**

- 1 Lo recuerda
- 2 El/ella no lo sabe decir
- 3 Incorrecto o irrelevante
- 4 Sin respuesta
- 5 Anotar el año de nacimiento dado \_\_\_\_\_ 02101 |\_\_| 02101

**22. ¿Qué edad tiene?**

- 1 Correcto
- 2 El/ella no lo sabe decir
- 3 Incorrecto o irrelevante
- 4 Sin respuesta
- 5 Anotar la edad dada \_\_\_\_\_ 02201 |\_\_| 02202

**Si no existen discrepancias entre la edad y la fecha de nacimiento pasar a la pregunta 24**

23. No acaban de salirme bien las cuentas al sumar sus años, ¿puede Vd. ayudarme?

- 1 No comete error
  - 2 Muestra una marcada inseguridad acerca de sus años/edad y su fecha de nacimiento
  - 3 El entrevistado no corrige la discrepancia entre la fecha de nacimiento que ha declarado y su edad (ignorar un error de un solo año)
  - 4 Error de 2 ó 3 años
  - 5 Error de más de 3 años
- |\_\_| 02301

24. A veces, cuando uno no está del todo bien, puede tener dificultades para recordar la fecha. ¿Puede decirme qué día del mes es hoy?, ¿qué día de la semana?, ¿qué mes?, ¿qué estación?, ¿qué época del año?, ¿qué año?

**Anotar la fecha indicada (incluye día de la semana, día del mes, mes, estación y año).**

02401

**Se valorarán estos ítems en el ECMM más adelante**

**Si recuerda perfectamente la fecha, pasar a la pregunta 25**

- 1 Correcto
  - 2 Error en un solo día/mes/año
  - 3 Error en más de un día/mes (se permite, p. ej., marzo en la 1ª semana de abril)/año
  - 4 Error en día de la semana
  - 5 Error en el mes
  - 6 Él/ella no sabe el mes
  - 7 Al menos parte de la respuesta es incompleta, irrelevante o no hay respuesta
  - 8 Error en el año
  - 9 Él/ella no sabe el año
- |\_\_| 02402

**Si es entrevistado en un lugar distinto a su propia casa, pasar a la pregunta 26**

25. Sabe cuál es su dirección postal (para las cartas, correo)?

**Hacer más preguntas para ver la dirección completa y asegurarse que el entrevistado sabe o no los cinco ítems del ECMM. Si se le entrevista en casa, pasar al ECMM**

02501

26. ¿Cómo se llama este lugar donde estamos ahora?

**Hacer más preguntas para ver la dirección completa y asegurarse que el entrevistado sabe o no los cinco ítems del ECMM**

02601

### I-1.3 Examen Cognoscitivo Mini-Mental (MEC)

**Por favor puntúe el ECMM una vez concluida la pasación y anote el resultado en el cuadernillo para su consideración durante la administración de esta batería**

28. Orientación Temporal

**No preguntar, puntuar a partir de las respuestas correspondientes de la sección de orientación del GMS (secc. I-1.2, ítems 21-27)**

- 1 Día
- 2 Fecha
- 3 Mes
- 4 Estación
- 5 Año

Puntuación \_\_\_\_\_ 02801

|\_\_| 02802

29. Orientación Espacial

**No preguntar, puntuar a partir de las respuestas correspondientes de la sección de orientación GMS (secc. I-1.2, ítems 21-27)**

- 1 Calle/Hospital
- 2 N° calle/Planta
- 3 Ciudad
- 4 Provincia
- 5 Nación

|\_\_| 02901

30. Ahora, por favor, le voy a pedir que repita estas 3 palabras:

- 1 Pelota
- 2 Caballo
- 3 Manzana

|\_\_| 03001

*Repetirlas hasta que las aprenda y contar los intentos* \_\_\_\_\_ 03002

Acuérdese de ellas, porque se las preguntaré dentro de un rato.

31. *Atención y cálculo:* Si tiene 30 monedas y me va dando de 3 en 3. ¿Cuántas le van quedando?

- 1 27
- 2 24
- 3 21
- 4 18
- 5 15

Puntuación \_\_\_\_\_ 03101

|\_\_| 03102

32. *Memoria:* ¿Recuerda las 3 palabras que le he dicho antes?

- 1 Pelota
- 2 Caballo
- 3 Manzana

|\_\_| 03201

33. *Denominación:* Mostrar un bolígrafo: ¿Qué es esto?

- 1 Sí
- 2 No

|\_\_| 03301

34. *Denominación:* Repetirlo con el reloj: ¿Qué es esto?

- 1 Sí
- 2 No

|\_\_| 03401

35. *Repetición:* Repita esta frase: "En un trigal había cinco perros"

- 1 Sí
- 2 No

|\_\_| 03501

36. *Comprensión:* Coja este papel con la mano derecha, (1) dóblelo por la mitad (2) y póngalo en el suelo/mesa (3)

- |   |   |   |    |
|---|---|---|----|
| 1 | 2 | 3 | Sí |
| 1 | 2 | 3 | No |

|\_\_| 03601

37. *Lectura:* Lea esto y haga lo que dice:

# CIERRE LOS OJOS

- 1 Sí
- 2 No

|\_\_| 03701

38. *Escritura:* Escriba una frase (algo que tenga sentido):

- 1 Sí
- 2 No

|\_\_| 03801

39. Dibujo: Copie este dibujo:

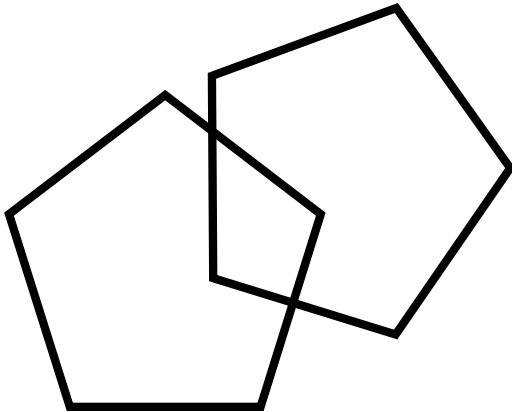

- 1 Sí
- 2 No

|\_\_| 03901

PUNTUACIÓN TOTAL

PUNTUACIÓN TOTAL CORREGIDA

**Por favor, obtenga y anota la puntuación total y corregida del MMCE en el espacio correspondiente**

40. Nivel de consciencia

- 1 Alerta
- 2 Obnubilación
- 3 Estupor
- 4 Coma

|\_\_| 04001

41. Juicio: Competencia del entrevistado para completar el ECMM

- 1 No hubo problemas en la administración
- 2 El entrevistado es analfabeto
- 3 El entrevistado tiene algún problema físico que le impide el cumplimiento del ECMM
- 4 El entrevistado está demasiado demenciado como para completar el ECMM
- 5 Circunstancias sociales impiden la administración
- 6 Se interrumpe la entrevista sin poder completar el test

|\_\_| 04101

42. Número de ítems no contestados del ECMM \_\_\_\_\_ 04201

43. ¿Es Vd. diestro o zurdo? ¿Con qué mano corta el pan (etc.) o tiraría una pelota?

- 1 Diestro
- 2 Zurdo

|\_\_| 04301

**Por favor, anote el tiempo transcurrido de la entrevista hasta este momento** |\_\_\_\_\_| 04401

## II-2 Exploración Psiquiátrica (GMS-B, HAS)

### II-2.1 Preocupación

#### Código en caso de ausencia de respuesta:

Por favor complete cada ítem con el número de opción o respuesta apropiados. En caso de ausencia de respuesta utilice el código 99 seguido de alguna de las especificaciones siguientes.

1. No puede responder por trastorno cognitivo
2. No puede hacerlo por limitaciones físicas
3. Se niega
4. No es apropiado
5. Desconoce la respuesta
6. Otra

45. Ahora, si no le importa, me gustaría preguntarle por el último mes, ¿cómo se ha sentido durante el último mes? Por ejemplo: ¿Le preocupa alguna cosa?

**Si no menciona ninguna preocupación, pasar a la pregunta 50**

04501

46. ¿De qué se preocupa Vd.? Tema o contenido de las preocupaciones, si lo hay.

- 1 Su propia salud
- 2 La salud de otros
- 3 Sus negocios (incluyendo la pensión)
- 4 Problemas familiares (aparte de la salud)  04601

47. Si tiene hijos: ¿Y, en concreto, hay algo en la relación con sus hijos que le preocupe o le altere? ¿Qué es?

- 1 Alterado o preocupado por las relaciones con sus hijos  04701

48. ¿Cuánto se preocupa Vd.?

- 1 Se preocupa mucho (p. ej. de una o dos cosas)
- 2 Es preocupadizo, se preocupa de casi todo ahora  04801

49. ¿Es desagradable preocuparse tanto?, (¿Puede Vd. dejar de preocuparse?, ¿Le vienen estos pensamientos constantemente a la cabeza?)

- 1 Preocupación desagradable que le viene constantemente a la cabeza o que no puede detener  04901

### II-2.2 Ansiedad General

50. ¿Se asusta Vd., se pone nervioso? (¿Le ocurre esto últimamente?) (¿Qué le hace sentirse así?)

- 1 Hay ansiedad o miedo subjetivos, no proporcionales al suceso que los ocasiona  05001

51. ¿Ha tenido Vd. como crisis o ataques de miedo, (incluso de pánico,) en los que se haya visto obligado a hacer algo en concreto para detenerlos?

- 1 Episodio crítico de ansiedad que la persona intenta detener p. ej. pidiendo ayuda, acudiendo al médico/urgencias, saliendo corriendo de la habitación

|\_\_| 05101

**Si no hay crisis de pánico, pasar a la pregunta 52**

**En caso afirmativo determinar el número de crisis de pánico:**

- 51.a En la última semana \_\_\_\_\_ 05102  
 51.b En el último mes \_\_\_\_\_ 05103  
 51.c En el último año \_\_\_\_\_ 05104

**II-2.3 Tensión**

52. ¿Está cansado? (¿Exhausto?) Si responde: No ¿Y por la noche?

- 1 Está cansado o exhausto por el día o por la noche |\_\_| 05201

53. ¿Tiene dificultades para relajarse, para relajar su cuerpo?

- 1 Dificultades para descansar (relajarse) |\_\_| 05301

54. ¿Tiene dolores de cabeza? ¿En qué parte? ¿Cómo son?

- 1 No  
 2 Refiere dolores de cabeza  
 3 Refiere cefaléas tensionales, p. ej.: "bandas alrededor de la cabeza", "presión", "tensión en la nuca", "pesadez" |\_\_| 05401

**Como dolores tensionales no anotar las migrañas, p. ej., dolor de cabeza unilateral, pulsátil, con distorsión visual y náusea.**

**II-2.4 Irritabilidad**

55. ¿Está Vd. últimamente más irritable (enfadado)?, ¿y le ocurre a menudo?, (¿incluso cada día?), (¿Durante cuánto tiempo?)

- 1 Admite su irritabilidad (enfado)  
 2 Irritable casi todos los días durante al menos dos semanas en el último mes |\_\_| 05501

56. Y con Vd. mismo, ¿Se enfada con Vd. mismo?

- 1 Se enfada consigo mismo |\_\_| 05601

**II-2.5 Síntomas Neurovegetativos**

57. ¿Ha notado los latidos de su corazón (palpitaciones) o se ha encontrado tembloroso en el último mes? (¿cuando esto no era debido al ejercicio?) ¿Qué sucedió?, ¿Ha tenido otros síntomas como, por ejemplo: sequedad de boca, dificultades para respirar, sensación de ahogo, malestar, dolor en el pecho, náuseas, problemas en el vientre, mareos, escalofríos, etc.?

- 1 Palpitaciones (p. ej., el paciente es consciente de los latidos de su corazón, no debido al ejercicio pero a menudo acompañado de ansiedad)  
 2 Temblores ligeros o de grado medio debidos a la ansiedad  
 3 Otros signos corporales de ansiedad; especificar \_\_\_\_\_ 05701

|\_\_| 05702

**II-2.6 Trastornos Somáticos**

58. ¿Qué tal apetito tiene? ¿Come bien? (¿Ha comido últimamente más o menos de lo normal?)

- 1 Apetito normal  
 2 Disminución de la apetencia por la comida  
 3 Aumento de la apetencia por la comida |\_\_| 05801



**Si come bien, pasar a la pregunta 60**

59. ¿A qué se debe? ¿Lleva pasándole esto casi todos los días de este último mes? Mal apetito sin alteración médica conocida y sin náuseas o dispepsia

- 1 Alteración del apetito presente casi todos días durante al menos 2 semanas en el último mes

|\_\_| 05901

59.a En caso positivo especificar

- 1 Disminución del apetito  
2 Aumento del apetito

|\_\_| 05902

60. ¿Ha perdido peso en los últimos 3 meses? (¿Ha ganado peso?) ¿Cuánto? ¿Y en el último mes?

- 1 No  
2 Ha perdido 4.5 Kg. o más durante los últimos 3 meses  
3 Ha perdido 4.5 Kg. o más durante el último mes  
4 Ha ganado 4.5 Kg. o más durante el último mes

|\_\_| 06001

61. ¿Ha tenido problemas para dormir últimamente? (¿Ha tomado algo para dormir?) ¿Durante cuánto tiempo lleva ocurriéndole? ¿Qué suele pasar?

- 1 Problemas o cambio reciente en el patrón de sueño

|\_\_| 06101

**En caso negativo pasar a la pregunta 66**

61.a En caso afirmativo especificar el tipo de alteración

- 1 Padece insomnio la mayor parte de la noche y duerme principalmente durante el día  
2 Marcado insomnio la mayor parte de las noches, durante al menos 2 semanas en el último mes  
3 Marcado y excesivo sueño la mayor parte de las noches, durante al menos dos semanas en el último mes

|\_\_| 06102

62. Sólo si no ha quedado claro, insistir: Perdone que insista un poco. En concreto ¿Ha tenido dificultades para conciliar el sueño, para quedarse dormido? ¿Permanece despierto mucho tiempo?

- 1 Dificultad para conciliar el sueño. Si toma hipnóticos, valorar lo que el entrevistado cree que ocurriría si no los tomara

|\_\_| 06201

63. ¿Se despierta por la noche?

- 1 Interrupción del sueño por la noche

|\_\_| 06301

**Se incluye cuando el entrevistado se despierta tras un sueño ligero y no puede dormirse de nuevo durante más tiempo. Si toma hipnóticos, valorar lo que el entrevistado cree que ocurriría si no los tomara**

64. Finalmente, ¿Se despierta temprano por las mañanas, demasiado temprano, sin poder volverse a dormir? ¿A qué hora ocurre esto? ¿Cuál es su hora normal de levantarse? ¿Cuántas veces le ha ocurrido en las últimas semanas?

- 1 Despierta sobre 2 horas o más antes de la hora normal de despertarse y no puede volver a dormirse casi todas las noches durante al menos 2 semanas en el último mes

|\_\_| 06401

65. ¿Por qué se despierta? (¿Cuál es la dificultad?) ¿Es un problema (físico), del tipo de tener que ir al baño, o por algún dolor? ¿Le molesta el ruido?

- 1 Principalmente se debe o procede de una causa física corporal, o ruidos, etc  
2 La dificultad se debe a pensamientos o ánimos alterados, o a la tensión emocional (p. ej., permanece despierto con sentimientos o pensamientos depresivos-ansiosos)

|\_\_| 06501

**II-2.7 Soledad**

66. ¿Se siente Vd. sólo, tiene soledad?

- 1 Admite sentirse solo, en soledad (subjetivo)  06601

**Si no se siente solo pasar a la pregunta 69**

67. Esta soledad, ¿le preocupa, le afecta mucho? ¿La puede evitar?

- 1 Se siente solo, en soledad (subjetivo) y no puede hacer nada por evitarlo  
2 Preocupado o deprimido por su actual soledad  06701

68. Y para el futuro, ¿Le preocupa la posibilidad (perspectiva) de estar (vivir) solo (sin otras personas) en el futuro?

- 1 Le preocupa estar solo, sin otras personas (objetivo), en el futuro  06801

**II-2.8 Depresión**

69. ¿Qué me dice de su estado de ánimo?, (¿Ha estado Vd. bajo de ánimos, incluso triste [deprimido, infeliz] últimamente?)

- 1 Estado de ánimo deprimido  06901

70. ¿Ha llegado a llorar últimamente? (¿Con qué frecuencia?)

- 1 Ha llorado  07001

**Si ha llorado, pasar a la pregunta 73**

71. ¿Ha tenido ganas de llorar sin llegar a hacerlo? (¿Con qué frecuencia?)

- 1 Se ha sentido con ganas de llorar  07101

**Si el entrevistado no admite estar deprimido, haber llorado o haber querido llorar, Insistir:**

72. Se suele considerar que las personas de edad a menudo están bajos de ánimo, con tendencia a estar tristes pero, a pesar de ello, Vd. se encuentra bien, ¿Es así?

- 1 Sí  
2 No  07201

**Si no existen indicios de depresión, pasar a la pregunta 83**

73. ¿Está Vd. así todo el tiempo? ¿Cuánto le ha durado ese estado de ánimo, esa depresión? (¿Sólo unas pocas horas o más?)

- 1 La depresión, llanto o ganas de llorar dura más de unas pocas horas ocasionales  
2 La depresión, llanto o ganas de llorar está presente la mayor parte del tiempo  07301

73.a ¿Durante cuanto tiempo la ha tenido?

- 1 Presente durante al menos dos semanas seguidas en el último mes  07302

74. ¿Varía su estado de ánimo mucho en el mismo día, es cambiante, fluctúa mucho?

- 1 Humor fluctuante  07401

75. ¿A qué hora del día se siente peor?

**Si en ninguno de los períodos siguientes, puntuar: 0. Si es severa durante todo el día, puntuar 1 en los 3 ítems.**

- 1 Sobre todo por la mañana  
2 Sobre todo por la tarde  
3 Sobre todo por la noche  07501

76. ¿Hay algo que alivie su depresión?, ¿las visitas, las noticias agradables, las distracciones? ¿Durante cuánto tiempo se alivia?

- 1 Alguna experiencia placentera alivia la depresión, pero las visitas o actividades de entretenimiento no la alivian o sólo la alivian 1 ó 2 horas  
2 Anhedonia profunda: nada alivia la depresión  07601

**II-2.9 Culpabilidad**

77. ¿Tiende Vd. a reprocharse algo, a sentirse poco útil o incluso a sentirse culpable? Sólo si sugiere que sí, continuar: ¿De qué? (¿Quiere decir que de hecho se siente inútil?) (¿Cuánto tiempo lleva sintiéndose así?) (¿Cree Vd. que es razonable sentirse así?)

- 1 Excesiva autoinculpación obvia por "peccadillos" pasados o del presente (No se incluye una ligera o justificada autoinculpación)
- 2 Menciona arrepentimientos del pasado que pudieran o no ser justificables
- 3 Se siente inútil o con una severa culpa casi todos los días durante al menos dos semanas
- 4 Inutilidad o culpa de intensidad delirante la mayoría de los días

|\_\_| 07701

78. Veo que ha estado bajo de ánimos, (resumir los síntomas observados), ¿Cómo ve (o siente) su futuro? (¿Cómo cree que le saldrán las cosas en el futuro?) (¿Qué espera del futuro?)

- 1 No es pesimista, pero no tiene expectativas (vive día a día, "a mi edad no hay futuro") (profundizar en el tema)

|\_\_| 07801

78.a *Si es pesimista: ¿Por qué? ¿Se ha sentido realmente desesperado (sin esperanzas)? Si se evade: ¿Hay algo en su futuro en lo que Vd. no quiera pensar?*

- 1 Es pesimista, el futuro le parece negro, no ve futuro o su futuro le es inaguantable
- 2 Sensación general de desesperación
- 3 Pesimismo obviamente justificado por las circunstancias

|\_\_| 07802

79. ¿Ha llegado a sentir que la vida no merece ser vivida?

- 1 Lo ha sentido

|\_\_| 07901

**Si no lo ha sentido, pasar a la pregunta 83**

80. ¿Ha sentido Vd. alguna vez que preferiría estar muerto? (Porque la vida ha llegado a ser una carga para Vd.) ¿Ha querido alguna vez terminar con todo? (¿Ha pensado hacer algo al respecto Vd. mismo?) (¿Suicidarse?)

- 1 Ha tenido pensamientos suicidas o ha deseado estar muerto

|\_\_| 08001

**Si nunca los ha sentido, pasar a la pregunta 83**

81. ¿Cuándo ocurrió esto? ¿Últimamente? (¿En el último mes?) (¿Cuántas veces?)

- 1 Nunca
- 2 Alguna vez en el último mes
- 3 En el último año

|\_\_| 08101

81.a Los deseos de estar muerto...

- 1 Han durado al menos dos semanas en el último mes

|\_\_| 08102

**Si no lo ha sentido en el último mes, pasar a la pregunta 83**

82. ¿Llegó a intentar algo al respecto, hacerse daño hace poco tiempo? ¿Cuándo? ¿Qué hizo? (¿O qué planeó hacer?) ¿Por qué piensa que se sintió así?

- 1 Ha rechazado el suicidio, pero ha deseado estar muerto, porque la vida es una carga.
- 2 Ha hecho o planeado algo para suicidarse

|\_\_| 08201

83. *Observación:* Parece (al verlo o escucharlo) tenso, preocupado, deprimido o miedoso

**Si no presenta estos síntomas, pasar a la pregunta 84**

- 1 Parece tenso o preocupado
- 2 Se le escucha triste, apagado, pesimista o deprimido
- 3 Parece aprensivo o miedoso
- 4 Ojos húmedos: llenos de lágrimas o llorando

|\_\_| 08301

**II-2.10 Lentitud**

84. ¿Se ve Vd. (está) lento en sus movimientos (físicos)?

1 Lentitud subjetiva de movimientos  08401

85. ¿Se ve Vd. con muy poca energía (para hacer las cosas que quiere hacer)? ¿Cuánto tiempo lleva ocurriéndole? ¿Es Vd. así la mayor parte del tiempo?

1 Restricción subjetiva de energía  
2 Presente casi todos los días durante al menos dos semanas  08501

86. ¿Puede hacer sus tareas o su actividad habitual? (Valorar sólo las restricciones no impuestas por el ambiente)

1 Hace menos de lo normal  08601

**Si no hay enlentecimiento, falta de energía o reducción de actividad, pasar a la pregunta de observación 92**

87. ¿Cuándo comenzó este problema (el enlentecimiento, la pérdida de energía, la reducción de actividad)? ¿Le ha ido a peor en los últimos meses?

1 Comenzó o empeoró en los últimos 3 meses  08701

88. ¿Se siente peor en algún momento del día?

1 No hay diferencias  
2 Lentitud o falta de energía peor por la mañana  
3 La lentitud o falta de energía aumenta en las últimas horas de la tarde  08801

89. ¿Está presente casi todos los días?

1 La lentitud ha estado presente casi todos los días durante al menos dos semanas  08901

90. ¿Qué pasa cuando alguien le visita o Vd. tiene que salir? ¿Se cansa demasiado?

1 No soporta incluso estas actividades normalmente placenteras  09001

91. ¿Permanece Vd. ahora mucho tiempo sentado (o más tiempo en la cama de lo normal) por falta de energía?

1 Está sentado o en la cama por falta de energía  09101

92. Observación:

1 Muy lento en todos sus movimientos  09201

**II-2.11 Interés**

93. ¿Se interesa por las cosas? (¿Mantiene sus intereses?)

1 Tiene menos interés por las cosas de lo que es normal para él/ella  09301

94. ¿Disfruta Vd. con algo?, ¿Qué le gusta hacer últimamente? (¿Ha habido algún cambio?)

1 Prácticamente no disfruta con nada  09401

**Si no ha descendido su interés, pasar a la pregunta 98**

95. ¿Cuándo notó Vd. esta pérdida de interés (que no disfruta)? ¿Cuándo comenzó? ¿Ha aparecido recientemente? ¿Durante cuánto tiempo?

1 Pérdida de interés/disfrute gradual durante algunos años  
2 La pérdida de interés/disfrute ha ocurrido sólo en los últimos 3 meses  09501

96. ¿Le pasa casi todos los días?

1 Sin interés/disfrute casi todos los días durante al menos 2 semanas el último mes  09601

97. Y, ¿a qué se debe?, ¿lo sabe?, considera que se debe a estar deprimido o nervioso?

2 Demasiado deprimido o nervioso  09701

### II-2.12 Concentración

**98.** ¿Cómo está de concentración? *Sólo sondear.* ¿Puede Vd. concentrarse, por ejemplo, en un programa de T.V. (radio, película)? (¿Puede Vd. verlo-escucharlo entero?) (¿Le ocurre a menudo?)

1 Dificultad de concentración para el entretenimiento  09801

**99.** ¿Lee Vd.? ¿Puede concentrarse en lo que lee? (¿Le ocurre a menudo?)

1 Dificultad de concentración en la lectura  09901

*Si no existen dificultades, pasar a la pregunta 111*

**100.** ¿Cuánto tiempo lleva esto molestandole?

1 Dificultad de concentración en cualquiera de sus formas casi todos los días durante al menos dos semanas  10001

**101.** *Observación:*

1 Dificultad obvia de concentración en la entrevista  10101

### II-2.13 Dificultades de pensamiento

**102.** *Observación:*

1 Parece confuso (se le mezclan los pensamientos, no puede pensar claramente)  
2 Parece indeciso  10201

### II-2.14 Persecución

**103.** ¿Cómo se lleva con la gente normalmente? ¿Le hacen sentirse mal fácilmente?

1 Se siente mal fácilmente  10301

**104.** A veces nos dicen las personas (de edad) que alguna vez sienten que la gente está hablando mal de ellos, ¿le ha ocurrido a Vd.? Si sugiere que sí, preguntar: ¿Ha llegado a pensar que se ríen de Vd.?

1 Ha tenido esa sensación  10401

*Si la anterior pregunta puntúa 0, pasar a pregunta 106*

**105.** ¿Cree que realmente es cierto o es quizás una forma de pensar suya? (¿Está Vd. seguro?)

1 Probablemente no es verdad  
2 Considera que es cierto  
3 Está convencido de que es cierto  10501

**106.** No esperamos que se trate con todo el mundo pero ¿Hay alguien especial -no necesita decirme quién- con quien tenga particular dificultad para relacionarse?

1 Hay alguna/varias personas  10601

**107.** *Observación:*

1 Parece indebidamente suspicaz  10701

### II-2.15 Distorsión de la Percepción

**108.** ¿Le está ocurriendo últimamente alguna cosa rara o extraña, algo que no puede explicar? ¿Me puede poner algún ejemplo?. Yo le ayudo, por ejemplo, ¿está sintiendo, viendo, oyendo, etc. algo raro?

1 Cree que le sucede algo extraño  10801

**108.a** Especificar tipo de alucinaciones: \_\_\_\_\_ 10802

109. Juicio:

- 109.a Tiene otros delirios. Especificar: \_\_\_\_\_ 10901
- 109.b Tiene otras alucinaciones. Especificar: \_\_\_\_\_ 10902
- 109.c Tiene otros síntomas psicóticos. Especificar: \_\_\_\_\_ 10903

### II-3 Consideraciones Finales

**Código en caso de ausencia de respuesta:**

*Por favor complete cada ítem con el número de opción o respuesta apropiados. En caso de ausencia de respuesta utilice el código 99 seguido de alguna de las especificaciones siguientes.*

1. No puede responder por trastorno cognitivo
2. No puede hacerlo por limitaciones físicas
3. Se niega
4. No es apropiado
5. Desconoce la respuesta
6. Otro

110. ¿Le ha ocurrido alguna otra cosa durante este último mes que yo no le haya preguntado o incluido en esta entrevista?

***Anotar aquí cualquier punto que parezca ser importante o no usual, referente a la entrevista, no incluido en el programa. Valorar siempre que sea posible toda información contemplada aquí en su ítem adecuado. Por favor, usar esta sección para describir completamente la psicopatología no valorada adecuadamente en el programa, o cuando se dude de su adecuada o apropiada valoración.***

***Atención, esta sección deberá leerse, UTILICE LETRAS MAYÚSCULAS.***

---

---

---

---

---

---

---

---

---

---

---

111. En caso de posible "diagnóstico" (dirigir esta pregunta al familiar o cuidador principal cuando sea necesario):  
¿Le gustaría que le visitase un médico en su casa?

- 1 Sí  
2 No

|\_\_| 11101

## II-4 Ítems de observación del GMS

### II-4.1 Puntajes Conductuales

#### Código en caso de ausencia de respuesta:

Por favor complete cada ítem con el número de opción o respuesta apropiados. En caso de ausencia de respuesta utilice el código 99 seguido de alguna de las especificaciones siguientes.

1. No puede responder por trastorno cognitivo
2. No puede hacerlo por limitaciones físicas
3. Se niega
4. No es apropiado
5. Desconoce la respuesta
6. Otro

**Valorar los ítems siguientes sólo si la entrevista no ha sido completada (1. Sí; 2. No)**

|                                                                                                                                                   |    |       |
|---------------------------------------------------------------------------------------------------------------------------------------------------|----|-------|
| 113. Depresión: Parece triste o afligido o deprimido                                                                                              | __ | 11301 |
| 114. Depresión: Ojos húmedos: llenos de lágrimas o llorando                                                                                       | __ | 11401 |
| 115. Muy lento en todos sus movimientos                                                                                                           | __ | 11501 |
| 116. Dificultades de pensamiento: Parece confuso                                                                                                  | __ | 11601 |
| 117. Dificultades de pensamiento: Parece indeciso                                                                                                 | __ | 11701 |
| 118. Incomodidad social: Parece indebidamente suspicaz                                                                                            | __ | 11801 |
| 119. Concentración: Dificultad clara para concentrarse en la entrevista                                                                           | __ | 11901 |
| 120. Expresión emocional disminuida:                                                                                                              |    |       |
| 120.b Voz monótona. No se muestra expresivo en la conversación                                                                                    | __ | 12001 |
| 120.c No hay gestos acompañantes al habla                                                                                                         | __ | 12002 |
| 120.d No se muestra una emoción apropiada cuando se comentan ideas normales o delirantes las cuales normalmente producirían algún tipo de emoción | __ | 12003 |
| 120.e Estado de ánimo uniformemente aplanado, independientemente del tono de la conversación (indiferencia, aceptación apática)                   | __ | 12004 |
| 121. Expresión emocional disminuida:                                                                                                              |    |       |
| 121.a Pequeños accesos incontrolables de llanto                                                                                                   | __ | 12101 |
| 121.b Pequeños accesos incontrolables de risa                                                                                                     | __ | 12102 |
| 122. Risa                                                                                                                                         |    |       |
| 122.a Exaltado, eufórico, aunque quizás esté cambiando hacia irritabilidad o depresión                                                            | __ | 12201 |
| 122.b Alegría contagiosa                                                                                                                          | __ | 12202 |
| 123. Descarado: bromas estúpidas, comentarios poco serios                                                                                         | __ | 12301 |
| 124. Poco cooperador etc.: Intenta comenzar una riña o discusión                                                                                  | __ | 12401 |

**125. Abandono personal:**

- |                                                                    |    |       |
|--------------------------------------------------------------------|----|-------|
| <b>125.a</b> Las ropas están sucias, desarregladas o huelen mal    | __ | 12501 |
| <b>125.b</b> Pelo despeinado, enredado o enmarañado                | __ | 12502 |
| <b>125.c</b> Sin afeitarse, con mocos en la nariz, cara sucia, etc | __ | 12503 |

**126. Conducta: Inquieto:**

- |                                                                       |    |       |
|-----------------------------------------------------------------------|----|-------|
| <b>126.a</b> Se mantiene sin estar quieto o torciéndose en el asiento | __ | 12601 |
| <b>126.b</b> Se levanta y se mueve alrededor sin descanso             | __ | 12602 |

**127. Movimientos especiales:**

- |                                                                                                                                                                                                                                         |    |       |
|-----------------------------------------------------------------------------------------------------------------------------------------------------------------------------------------------------------------------------------------|----|-------|
| <b>127.a</b> Movimientos coreiformes (movimientos involuntarios de la cabeza, cuerpo o miembros en reposo continuos, sin propósito, espasmódicos)                                                                                       | __ | 12701 |
| <b>127.b</b> Movimientos atetósicos (movimientos de la lengua, mandíbulas o miembros continuos, sin propósito, lentos, retorcidos)                                                                                                      | __ | 12702 |
| <b>127.c</b> Movimientos parkinsonianos (temblor de las manos repetido y regular característico en reposo. Descrito como "contar monedas", como si el entrevistado estuviera contando monedas entre el pulgar y la punta de los dedos). | __ | 12703 |

**128. Raro, extravagante:**

- |                                                                                                        |    |       |
|--------------------------------------------------------------------------------------------------------|----|-------|
| <b>128.a</b> Movimientos estilizados, algo más que balancearse en la silla o balancear los pies        | __ | 12801 |
| <b>128.b</b> Movimientos repetitivos estereotipados, p. ej.: moverse en la silla, frotando cosas, etc. | __ | 12802 |
| <b>128.c</b> Toma posturas extrañas sin ninguna razón aparente                                         | __ | 12803 |

**129. Pérdida de la compostura social normal:**

- |                                                                            |    |       |
|----------------------------------------------------------------------------|----|-------|
| <b>129.a</b> Deliberadamente rasga, arroja o rompe algo                    | __ | 12901 |
| <b>129.b</b> Se toca los genitales, mete el dedo en la nariz, eructa, etc. | __ | 12902 |
| <b>129.c</b> Se desnuda o exhibe sus genitales                             | __ | 12903 |
| <b>129.d</b> Hace sugerencias sexuales o insinuaciones al entrevistador    | __ | 12904 |
| <b>129.e</b> Palabras o gestos obscenos                                    | __ | 12905 |

**130. Habla: Restricción de la cantidad:**

- |                                                                                                                                                                                                                                |    |       |
|--------------------------------------------------------------------------------------------------------------------------------------------------------------------------------------------------------------------------------|----|-------|
| <b>130.a</b> El paciente está totalmente mudo, pronuncia no más de media docena de palabras reconocibles en respuestas a las preguntas en el curso de la entrevista. No incluir los comentarios en alto que se hace a sí mismo | __ | 13001 |
| <b>130.b</b> El paciente frecuentemente deja de contestar. Hay que repetir las preguntas<br><i>No puntuarlo si las respuestas del enfermo son inaudibles o incomprensibles</i>                                                 | __ | 13002 |

**131. Habla: Incoherencia:**

- |                                                                                                                                                                                                       |    |       |
|-------------------------------------------------------------------------------------------------------------------------------------------------------------------------------------------------------|----|-------|
| <b>131.a</b> Calidad vaga y amorfa del habla. La expresión de pensamientos o ideas no es completa; los temas cambian continuamente o se funden unos con otros. Las ideas comunicadas no son claras    | __ | 13101 |
| <b>131.b</b> Irrelevante. El contenido de las respuestas a veces tiene poca relación, si tiene alguna, con lo que se le ha preguntado (no incluir el habla cambiante de un tema a otro o incoherente) | __ | 13102 |
| <b>131.c</b> Habla circunstancial: da muchos detalles innecesarios pero al final alcanza el objetivo que se propone en el habla                                                                       | __ | 13103 |
| <b>131.d</b> Divagante: habla sin apuntar a un tema concreto, divagando, pero las ideas están razonablemente bien formadas                                                                            | __ | 13104 |

**132. Ritmo del habla:**

- |                                                                                                                                                              |    |       |
|--------------------------------------------------------------------------------------------------------------------------------------------------------------|----|-------|
| <b>132.a</b> Habla extremadamente rápida pero puede ser interrumpido                                                                                         | __ | 13105 |
| <b>132.b</b> Presión del habla: demasiadas palabras, rápido y con pausas infrecuentes y un flujo incontrolado. Habla y habla y se resiste a ser interrumpido | __ | 13106 |
| <b>132.c</b> "Fuga de Ideas": Una idea sugiere a otra en rápida sucesión, de tal modo que el paciente pronto ha perdido el hilo de la conversación           | __ | 13107 |
| <b>132.d</b> Lentitud: Habla muy lenta. Pausas muy bien delimitadas entre palabras                                                                           | __ | 13108 |
| <b>132.e</b> Largas pausas antes de contestar a un rasgo característico                                                                                      | __ | 13109 |



- |                                                                                                                                                                   |    |       |
|-------------------------------------------------------------------------------------------------------------------------------------------------------------------|----|-------|
| <b>133.</b> Contenido del habla (bromas frecuentes, chistes)                                                                                                      | __ | 13301 |
| <b>134.</b> Perseveración: Repite las respuestas de manera inapropiada                                                                                            | __ | 13401 |
| <b>135.</b> Juicio: Los problemas de memoria son más prominentes que los problemas de pensamiento, p. ej. más dificultad para recordar cosas que para deducirlas. | __ | 13501 |

**II-4.2 Dificultades de Comunicación**

*Valorar solo si contribuyen claramente a las dificultades de comunicación (Extranjero. Por ejemplo, español pobre y entrecortado, se precisa intérprete, marcado acento extranjero o Español que habla aragonés, catalán, gallego... y mal castellano)*

**136.**Defectos físicos:

*No valorar aquí los defectos de memoria*

- |                                                                                                 |    |       |
|-------------------------------------------------------------------------------------------------|----|-------|
| <b>136.a</b> Disfasia (debida a la lesión cerebral, no usa/comprende bien las palabras)         | __ | 13601 |
| <b>136.b</b> Disartria. (No articula o pronuncia bien las palabras por lesión a nivel cerebral) | __ | 13502 |
| <b>136.c</b> Disartria (lesión en los órganos fonadores)                                        | __ | 13603 |
| <b>136.d</b> Pérdida de dientes                                                                 | __ | 13604 |
| <b>136.e</b> Sordera grave                                                                      | __ | 13605 |
| <b>136.f</b> Ceguera (casi total)                                                               | __ | 13607 |
| <b>136.g</b> Tartamudeo                                                                         | __ | 13608 |
| <b>136.h</b> Mutismo debido a un defecto físico                                                 | __ | 13609 |
| <b>136.i</b> Debilidad, cansancio, flojera graves                                               | __ | 13610 |
| <b>136.j</b> Otros Especificar:_____ 13611                                                      | __ | 13612 |
| <b>136.k</b> Oligofrenia/baja inteligencia                                                      | __ | 13613 |

**137.**Conductas específicas:

- |                                                                                                                                                 |    |       |
|-------------------------------------------------------------------------------------------------------------------------------------------------|----|-------|
| <b>137.a</b> Por ejemplo, hostil, se niega a contestar, objeta las preguntas, reacio a ser entrevistado                                         | __ | 13701 |
| <b>137.b</b> Fatiga razonable                                                                                                                   | __ | 13702 |
| <b>137.c</b> Vago, evasivo, respuestas ambiguas. Se contradice, circunstancial (añade detalles innecesarios, pero alcanza el objetivo al final) | __ | 13703 |
| <b>137.d</b> Confuso pero NO incoherente                                                                                                        | __ | 13704 |
| <b>137.e</b> Murmullos, susurros, voz débil                                                                                                     | __ | 13705 |
| <b>137.f</b> Farfullero no debido a defecto físico o drogas                                                                                     | __ | 13706 |
| <b>137.g</b> Otros. Especificar:_____ 13706                                                                                                     | __ | 13708 |
| <b>137.h</b> Condiciones desfavorables durante entrevista (ruidos, etc.), que pueden distraer                                                   | __ | 13709 |
| <b>137.i</b> El paciente se duerme repetidamente y hay que despertarle                                                                          | __ | 13710 |
| <b>137.j</b> El paciente parece adormilado en general, pero no se llega a quedar dormido realmente                                              | __ | 13711 |

**138.**Dificultades de comunicación patológicas:

- |                                                                                                                                                              |    |       |
|--------------------------------------------------------------------------------------------------------------------------------------------------------------|----|-------|
| <b>138.a</b> Defecto de memoria (Claro): Por ejemplo, desorientado, gran pérdida de memoria, clara amnesia temporal e incapaz de recordar sucesos relevantes | __ | 13801 |
|--------------------------------------------------------------------------------------------------------------------------------------------------------------|----|-------|

**138.b** Defecto de memoria (dudoso): P. ej., recuerdos vagos, se queja, no convincentemente, de no poder recordar algo, hace pequeños esfuerzos para recordar, memoria no disminuida para tópicos neutrales |\_\_| 13802

**138.c** Incoherente con conciencia clara: p. ej., irrelevante o raro o respuestas impensadas, ideas no asociadas, charla incoherente, neologismos, perseverancia, fuga de ideas |\_\_| 13803

**139. Conducta vívidamente patológica:**

**139.a** P. ej., mantiene su postura ante delirios o alucinaciones |\_\_| 13901

**139.b** Incorpora al entrevistador en sus delirios |\_\_| 13902

**139.c** Posturismo (mantiene una postura de cualquier parte del cuerpo extraña o poco común repetidamente o durante varios minutos seguidos), conducta bizarra |\_\_| 13903

**139.d** Habla para él coherentemente, habla a voces |\_\_| 13904

**139.e** Lloro/grita de manera incontrolable |\_\_| 13905

**139.f** Presión del habla (no se le puede interrumpir, no deja intervenir al entrevistador) |\_\_| 13906

**139.g** Gran suspicacia |\_\_| 13907

**140. Conducta ambiguamente patológica:**

**140.a** Por ejemplo, mutismo no debido a defecto físico |\_\_| 14001

**140.b** Suspica, negativista (hace claramente lo contrario de lo que el entrevistador le pide o pregunta) |\_\_| 14002

**140.c** Distanciamiento o apatía posiblemente debidos a indiferencia o a una profunda depresión |\_\_| 14003

**140.d** Muy hablador, pero no habla a presión |\_\_| 14004

**140.e** Falta de introspección (insight). Niega totalmente los síntomas o la enfermedad |\_\_| 14005

**140.f** Excitado, agitado, o claramente gozoso/eufórico (no puede quedarse quieto en la silla, o interrumpe frecuentemente con bromas u observaciones) |\_\_| 14006

**140.g** Preocupado por experiencias internas no declaradas u ocultas (preocupación inespecífica) |\_\_| 14007

**140.h** Distraibilidad (la atención del entrevistado es atraída frecuentemente por eventos del entorno triviales e irrelevantes) |\_\_| 14008

**141. Intoxicación Medicamentosa:**

- 1 No
- 2 Posiblemente
- 3 Muy probablemente |\_\_| 14101

**II-5 Fiabilidad**

**Código en caso de ausencia de respuesta:**

*Por favor complete cada ítem con el número de opción o respuesta apropiados. En caso de ausencia de respuesta utilice el código 99 seguido de alguna de las especificaciones siguientes.*

1. No puede responder por trastorno cognitivo
2. No puede hacerlo por limitaciones físicas
3. Se niega
4. No es apropiado
5. Desconoce la respuesta
6. Otro

**Juicio: Valorar si hay ERRORES o números 8 en las secciones de orientación o memoria, o si hay numerosos 8 en el resto de la entrevista.**

**142.** Errores cometidos con conciencia clara (no durmiéndose, o bajo la influencia del alcohol o drogas o delirio debido a enfermedad física aguda:

- 1 Debidos a agitación, depresión, euforia, etc
- 2 Debidos a un defecto de memoria |\_\_| 14201

**143.** Errores cometidos con obnubilación de la conciencia (por ej., el entrevistado se estaba durmiendo, bajo la influencia de alcohol, drogas o delirio debido a enfermedad física aguda

- 1 Sí
- 2 No |\_\_| 14301

**144.** La reacción del entrevistado hacia los errores fue poco intensa, indiferente o eufórica

- 1 Sí
- 2 No |\_\_| 14401

**145.** Valoración global de la confianza en los datos

- 1 Razonable (las respuestas dadas por el entrevistado pueden considerarse apropiadas para más o menos todas las preguntas
- 2 Pocas dudas
- 3 Dudas moderadas
- 4 Dudas graves (el entrevistador considera que el entrevistado fue incapaz o no quiso dar respuestas que pudieran considerarse apropiadas a la mayor parte de las preguntas)
- 5 Sin valor (respuestas más o menos impensadas, dadas al azar) |\_\_| 14501

***Si se duda:***

**146.** Aparte de las dificultades de comunicación las dudas del entrevistador se deben relativamente a:

- 1 No hay dudas
- 2 Exageración o tendencia a decir "sí" indiscriminadamente
- 3 Minimización o tendencia a decir "no" indiscriminadamente |\_\_| 14601

|                           |
|---------------------------|
| <b>II-6 Resumen Final</b> |
|---------------------------|

**Resumen: descripción global del entrevistado basado en la totalidad de la entrevista**

**Atención, esta sección deberá leerse, por favor UTILICE LETRAS MAYÚSCULAS**

---

---

---

---

---

---

---

---

---

---

---

---

---

---

---

---

---

---

---

---

---

---

---

---

---

---

---

---

---

---

---

---

---

---

14701

**II-7 Diagnóstico Psiquiátrico**

149. Este entrevistado, ¿es un caso de demencia?

- 1 No caso
- 2 "Borderline" no caso
- 3 Caso leve
- 4 Caso moderado
- 5 Caso grave

|\_\_| 14901

**II-8 Diagnósticos GMS-HAS**

150. Diagnósticos GMS-HAS

|                       | Código CIE-10 | Certeza | Grado | Pronóstico |
|-----------------------|---------------|---------|-------|------------|
| Principal             | _____         | _____   | _____ | _____      |
| Principal alternativo | _____         | _____   | _____ | _____      |
| Secundario            | _____         | _____   | _____ | _____      |
| Terciario             | _____         | _____   | _____ | _____      |

**CÓDIGOS:**

*Certeza (seguridad) diagnóstica:*

1. No hay dudas razonables;
2. Probablemente correcto;
3. Difícil de asegurar, pero en conjunto probable;
4. Muy incierto, pero las alternativas pertenecen a la misma categoría.

*Grado de la enfermedad:*

1. Leve; 2. Moderado; 3. Grave.

*Pronóstico estimado:*

1. Debería recuperarse satisfactoriamente sin tratamiento o intervención específica;
2. Debería mejorar satisfactoriamente sin tratamiento o intervención específica;
3. Debería recuperarse completamente con tratamiento o intervención específica;
4. Debería mejorar con tratamiento o intervención específica;
5. Poco probable que se mejore o recupere con cualquier tipo de intervención;
6. Probablemente se deteriore a pesar de toda intervención.

**Por favor, anote el tiempo transcurrido de la entrevista hasta este momento** | \_\_\_\_ | 15101

**III. Dolor**

**Código en caso de ausencia de respuesta:**

Por favor complete cada ítem con el número de opción o respuesta apropiados. En caso de ausencia de respuesta utilice el código 99 seguido de alguna de las especificaciones siguientes.

1. No puede responder por trastorno cognitivo
2. No puede hacerlo por limitaciones físicas
3. Se niega
4. No es apropiado
5. Desconoce la respuesta
6. Otro

**Por favor, tenga en mente que toda esta sección está referida específicamente a las últimas cuatro semanas**

**152.** A continuación voy a preguntarle con algo más de detalles sobre el dolor, ¿ha tenido dolor durante las últimas cuatro semanas?

- 1 Sí
- 2 No

**En caso negativo ir a la pregunta 164**

| \_\_\_\_ | 15201

**153.** ¿Dónde tiene o ha tenido dolores?

- |                                  |           |      |       |
|----------------------------------|-----------|------|-------|
| a. Cabeza, rostro, boca          | 1 Sí 2 No | ____ | 15301 |
| b. Nuca, cuello                  | 1 Sí 2 No | ____ | 15302 |
| c. Espalda (zona dorsal, lumbar) | 1 Sí 2 No | ____ | 15304 |
| d. Articulaciones                | 1 Sí 2 No | ____ | 15305 |
| e. Hombros, brazos, manos        | 1 Sí 2 No | ____ | 15306 |
| f. Piernas, rodilla, pie         | 1 Sí 2 No | ____ | 15307 |
| g. Tórax                         | 1 Sí 2 No | ____ | 15308 |
| h. Abdomen,                      | 1 Sí 2 No | ____ | 15309 |
| i. Región genital                | 1 Sí 2 No | ____ | 15310 |

**153.j** ¿En qué parte del cuerpo es peor el dolor?

\_\_\_\_\_

| \_\_\_\_ | 15311

**Completar código: señalar letra a-i**

154. En general, ¿me podría decir cuánto dolor ha tenido durante las últimas cuatro semanas?

**Lea las opciones e invite a la persona entrevistada a señalar la adecuada**

- 1 Ninguno
  - 2 Poco
  - 3 Moderado
  - 4 Mucho
  - 5 Muchísimo
- |\_\_| 15401

155. ¿Con qué frecuencia ha tenido dolor durante las últimas cuatro semanas?

- 1 Una vez
  - 2 Dos veces
  - 3 A menudo
  - 4 Muy frecuentemente
  - 5 Cada día o casi
- |\_\_| 15501

156. ¿En qué ocasiones y con motivo de qué ha tenido dolor durante las últimas cuatro semanas? ¿cuánto duró?

**En caso de mas de una vez codificar la ocasión con el tiempo mayor**

- 1 Hasta unos minutos
  - 2 Hasta una hora
  - 3 Varias horas
  - 4 Uno o dos días
  - 5 Mas de dos días
- |\_\_| 15601

157. Durante las últimas cuatro semanas, ¿cuánto afectó el dolor a las siguientes actividades?:

**Código: 1. Nada; 2. Poco; 3. Moderadamente; 4. Más bien mucho; 5. Mucho**

- |                                                          | Código    |
|----------------------------------------------------------|-----------|
| a. El humor                                              | __  15701 |
| b. La capacidad de moverse y desplazarse                 | __  15702 |
| c. El sueño                                              | __  15703 |
| d. Dificultades para trabajar incluido trabajo doméstico | __  15704 |
| e. Actividades de tiempo libre                           | __  15705 |
| f. Capacidad de sentir alegría de vivir                  | __  15706 |

158. ¿Cuántas veces durante las últimas cuatro semanas ha afectado el dolor a la vida diaria de la persona en estudio?

**Señalar número de días de 1 a 28.**

Días: \_\_\_\_\_ |\_\_| 15801

159. Imagínese que un 1 significa muy poco dolor y un 20 el máximo dolor posible. ¿Podría indicarme un número entre 1 y 20 que corresponde al grado de dolor que ha padecido Vd. en las últimas cuatro semanas?:

**Código: 1. Ningún dolor; 20. El peor dolor imaginable**

1 2 3 4 5 6 7 8 9 10 11 12 13 14 15 16 17 18 19 20

|\_\_| 15901

160. Utilizando otra vez la misma escala de 1 a 20. ¿Podría indicarme que número correspondería con el nivel máximo de dolor que ha experimentado Vd. en las últimas cuatro semanas?:

**Código: 1. Ningún dolor; 20. El peor dolor imaginable**

1 2 3 4 5 6 7 8 9 10 11 12 13 14 15 16 17 18 19 20

|\_\_| 16001



Especifique los códigos oportunos:

**Frecuencia:** 01. Varias veces a la semana; 02. Una vez en semana; 03. Algunas veces al mes; 04. Una vez al mes; 05. Una vez cada dos meses; 06. Menos frecuencia de una vez al mes.

**Localización:** 11. en uno de los lados de la cabeza; 12. No localizado.

**Síntomas que precedían el dolor de cabeza:** 21. No, 22. Auditivos; 23. Visuales; 24. Dificultes del lenguaje; 25. Olfativos.

**Pulsátil:** 31. Sí; 32. No

**Antecedentes familiares:** 41. Sí; 42. No

**Duración:** Especifique la duración aproximada en minutos de cada crisis.

(\*) Indique únicamente la letra que identifica el trastorno en la lista anterior

(\*\*) Tipo de asistencia recibida: 1. ambulatoria; 2. ingreso hospitalario. Indique el año y hospital correspondientes

(\*\*\*) Especificar el intervalo en años si el trastorno se dio anteriormente

## D. EXAMEN FÍSICO

### Código en caso de ausencia de respuesta:

Por favor complete cada ítem con el número de opción o respuesta apropiados. En caso de ausencia de respuesta utilice el código 99 seguido de alguna de las especificaciones siguientes.

1. No puede responder por trastorno cognitivo
2. No puede hacerlo por limitaciones físicas
3. Se niega
4. No es apropiado
5. Desconoce la respuesta
6. Otro

**Por favor proceda a la toma de la tensión arterial solo en el caso de que esta información no vaya a ser tomada durante la administración del Cuadernillo B**

166. Tensión arterial 1 mmHg \_\_\_\_ 16601 / \_\_\_\_ 16602

**Por favor asegúrese de que los pacientes no hayan fumado, tomado caféína o comido en los 30 minutos anteriores a la medida y hayan permanecido en reposo los 5 minutos anteriores a la medida. Los pacientes deberían estar relajados y no hablar. El paciente debe estar cómodamente sentado en una silla con el brazo en el que se vaya a medir la TA apoyado y a la altura del corazón y con los pies apoyados en el suelo. Se recomienda el uso de un tensiómetro de mercurio.**

167. Tensión arterial 2 mmHg \_\_\_\_ 16701 / \_\_\_\_ 16702

**Tome la segunda lectura transcurridos 2 minutos. Si las lecturas varían 5 mmHg o más, realice medidas adicionales.**

168. Auscultación pulmonar

1 Normales

2 Auscultación anormal, cual \_\_\_\_ 16801 lado \_\_\_\_ 16802 |\_\_| 16803

**1. Roncus; 2. Estertores; 3. Expiración prolongada; 4. Reducción del murmullo vesicular**

**1. Derecha; 2. Izquierda; 3. Bilateral**

169. Espirometría

PEF litros/minuto \_\_\_\_\_ 16901 |\_\_| 16902

**Realizar tres intentos y registrar el resultado superior**

170. Auscultación cardiaca



**170.a Ritmo**

- 1 Regular
- 2 Extrasístoles
- 3 Irregularidades, especificar \_\_\_\_\_ 17001 |\_\_| 17002

**170.b Soplo**

- 1 Sí, especificar \_\_\_\_\_ 17003
- 2 No |\_\_| 17004

**170.c Soplo cervical (no cardíaco irradiado)**

- 1 Sí, especificar \_\_\_\_\_ 17005  
**(1. Derecha; 2. Izquierda; 3. Bilateral)** |\_\_| 17006
- 2 No

**171. Signos de descompensación cardíaca**

**171.a Disnea**

- 1 Sí
- 2 No |\_\_| 17101

**171.b Cianosis periférica**

- 1 Sí
- 2 No |\_\_| 17102

**171.a Edema**

- 1 Sí
- 2 No |\_\_| 17103

**172. Intensidad de la insuficiencia cardíaca**

- 1 Asintomática
- 2 Insuficiencia cardíaca leve/disnea de esfuerzo de grado moderado a intenso
- 3 Insuficiencia cardíaca leve a moderada
- 4 Insuficiencia cardíaca con disnea de reposo
- 5 Encamado |\_\_| 17201

**173. Palpación tiroidea**

- 1 Normal
- 2 Aumentado difuso
- 3 Aumentado irregular |\_\_| 17301

**174. Hipotensión postural**

- 1 Sí
- 2 No |\_\_| 17401

**175. Prótesis ortopédica**

**175.a ¿Puede la persona entrevistada ponerse y retirarse la prótesis?**

- 1 Sí, por si solo
- 2 Sí, con ayuda |\_\_| 17501

**176. Úlceras de decúbito**

- 1 Si
- 2 No |\_\_| 17601

**Por favor, anote el tiempo transcurrido de la entrevista hasta este momento** |\_\_\_\_| 17701

## E. CRIBAJE NEUROLÓGICO (Test OMS)

### Código en caso de ausencia de respuesta:

Por favor complete cada ítem con el número de opción o respuesta apropiados. En caso de ausencia de respuesta utilice el código 99 seguido de alguna de las especificaciones siguientes.

1. No puede responder por trastorno cognitivo
2. No puede hacerlo por limitaciones físicas
3. Se niega
4. No es apropiado
5. Desconoce la respuesta
6. Otro

A continuación voy a hacerle algunas preguntas sobre síntomas que haya tenido y que pueden estar relacionados con su salud.

**La persona entrevistada es cribado como positivo si al menos una de las respuestas seleccionadas (ítems 178-193) está resaltada con un "(\*)", salvo en el caso de las preguntas 184 y 184.a, en cuyo caso ambas han de estar resaltadas con un "(\*)" para poder cribar al participante como positivo.**

## I. Cuestionario de síntomas

**178.** ¿Ha tenido alguna vez episodios de pérdida de conocimiento, es decir, no entender, oír, o ver lo que sucedía a su alrededor, y después no recordar lo ocurrido?

- 1 Si (más de una vez) (\*)
- 2 Si (una vez) (\*)
- 3 Nunca

|\_\_| 17801

**179.** ¿Ha tenido alguna vez movimientos involuntarios de piernas o brazos?

- 1 Si (\*)
- 2 No

|\_\_| 17901

**180.** ¿Ha habido cambios importantes en su manera de hablar?

- 1 Si (\*)
- 2 No

|\_\_| 18001

**181.** ¿Se le ha paralizado en alguna ocasión la cara, o parte de ella, durante más de 24 horas?

- 1 Si (\*)
- 2 No

|\_\_| 18101

**182.** ¿Se le ha torcido la boca en alguna ocasión durante más de 24 horas?

- 1 Si (\*)
- 2 No

|\_\_| 18201

**183.** ¿Ha sufrido en alguna ocasión parálisis o debilidad en sus brazos o piernas por un tiempo superior a 24 horas?

- 1 Si (\*)
- 2 No

|\_\_| 18301

**184.** ¿Ha tenido en alguna ocasión durante más de 24 horas, o por menos tiempo si ha sucedido más de una vez, hormigueo, dolor, quemazón, o pérdida del tacto en sus brazos o piernas sin que hubiera nada que le sucediese inmediatamente antes?

- 1 Si (\*)  
2 No |\_\_| 18401

**En caso afirmativo lea la pregunta 184.a**

**184.a** ¿Sucedio durante los últimos seis meses?

- 1 Si (\*)  
2 No |\_\_| 18402

**185.** ¿Ha tenido alguna vez rigidez o lentitud al moverse?

- 1 Si (\*)  
2 No |\_\_| 18501

**186.** ¿Ha tenido alguna vez temblores en la cabeza, brazos, o piernas que durasen más de un día?

- 1 Si (\*)  
2 No |\_\_| 18601

**II. Tareas físicas**

**Invitar al participante a sentarse**

**187.** Por favor, cierre sus ojos, ponga los brazos en alto en frente de Vd. con las palmas de las manos abiertas hacia arriba durante 30 segundos.

- 1 Capaz con ambos brazos  
2 No es posible por \_\_\_\_\_ 18701  
3 Incapaz (\*\*) con el brazo derecho (\*)  
4 Incapaz (\*\*) con el brazo izquierdo (\*)  
5 Incapaz (\*\*) con ambos brazos (\*) |\_\_| 18702

(\*\*) Los temblores son una posible explicación.

**Invitar al participante a permanecer sentado**

**188.** Por favor, cierre los ojos. Dígame cuál de estos dos objetos es áspero y cuál es suave.

*Ofrecer al participante un trozo de seda y un trozo de tejido áspero*

- 1 Capaz con ambas manos  
2 No es posible por \_\_\_\_\_ 18801  
3 Incapaz con la mano derecha (\*)  
4 Incapaz con la mano izquierda (\*)  
5 Incapaz con ambas manos (\*) |\_\_| 18802

**Invitar al participante a permanecer sentado**

**189.** Por favor, ponga sus brazos hacia delante. Cierre los ojos, toque su nariz con su dedo índice tres veces. Repítalo con su otra mano.

- 1 Capaz con ambas manos  
2 No es posible por \_\_\_\_\_ 18901  
3 Incapaz con la mano derecha (\*)  
4 Incapaz con la mano izquierda (\*)  
5 Incapaz con ambas manos (\*) |\_\_| 18902

**190.** Por favor, camine hacia la puerta primero sobre sus talones y luego de puntillas (2 metros).

- 1 Capaz  
2 No es posible por \_\_\_\_\_ 19001  
3 Dificultad al caminar (severa) (\*)  
4 Incapaz (\*) |\_\_| 19002

191. Por favor, permanezca de pie con los pies juntos.

- 1 Capaz
- 2 No es posible por \_\_\_\_\_ 19101
- 3 Dificultad para estar de pie (\*)
- 4 Incapaz (\*) |\_\_| 19102

192. Por favor, cierre los ojos y no se mueva durante unos segundos hasta que se lo indique (15 segundos).

**Hacer esta pregunta solo si la respuesta a la pregunta 191 es "Capaz"**

- 1 Capaz
- 2 No es posible por \_\_\_\_\_ 19201
- 3 Dificultad para estar de pie (\*)
- 4 Incapaz (\*) |\_\_| 19202

193. Ahora voy a comprobar el tono muscular de sus brazos.

*Evalúe el tono muscular mediante la manipulación de los brazos de la persona entrevistada (flexión y extensión del codo)*

- 1 Normal
- 2 Anormal (\*)
- 3 No evaluable por \_\_\_\_\_ 19301 |\_\_| 19304

## F. EXAMEN NEUROLÓGICO

### I. Exploración neurológica

#### Código en caso de ausencia de respuesta:

*Por favor complete cada ítem con el número de opción o respuesta apropiados. En caso de ausencia de respuesta utilice el código 99 seguido de alguna de las especificaciones siguientes.*

1. No puede responder por trastorno cognitivo
2. No puede hacerlo por limitaciones físicas
3. Se niega
4. No es apropiado
5. Desconoce la respuesta
6. Otro

***Esta sección constituye una evaluación sistemática. En algunos de los ítems se reseñan resultados de las tareas del cribaje neurológico. En tales casos tome el resultado del ítem señalado y no repita la tarea. Se requerirá contestar positivamente las opciones resaltadas en gris para proceder con la sección posterior referida a parkinsonismos***

195. Marcha

***Esta pregunta admite respuestas múltiples***

- |   |                                                         |    |       |
|---|---------------------------------------------------------|----|-------|
| 1 | Normal                                                  | __ | 19501 |
| 2 | Hemiparética                                            | __ | 19502 |
| 3 | A pequeños pasos relacionada con la edad                | __ | 19503 |
| 4 | <u>Marcha parkinsoniana o con actitud parkinsoniana</u> | __ | 19504 |
| 5 | <u>Con detenciones en los giros</u>                     | __ | 19505 |
| 6 | No puede caminar                                        | __ | 19506 |
| 7 | Otro, qué (p.ej., con ayuda de bastones) _____          | __ | 19507 |

**196. Tándem**

- 1 Fundamentalmente normal  
 2 Patológico |\_\_| 19601

**197. Romberg con ojos abiertos**

*Tomar resultado del ítem 191*

- 1 Normal/discreta inestabilidad  
 2 Con tendencia a caída hacia \_\_\_\_\_ 19701 |\_\_| 19702  
**(1. Derecha; 2. Izquierda; 3. Hacia atrás; 4. Hacia delante; 5. Todas direcciones)**

**198. Romberg con los ojos cerrados**

*Tomar resultado del ítem 192*

- 1 Normal/discreta inestabilidad  
 2 Con tendencia a caída hacia \_\_\_\_\_ 19801 |\_\_| 19802  
**(1. Derecha; 2. Izquierda; 3. Hacia atrás; 4. Hacia delante; 5. Todas direcciones)**

**199. Prueba de dedo nariz**

*Tomar resultado del ítem 189*

- 1 Normal bilateral  
 2 Patológica incluyendo la detención \_\_\_\_\_ 19901 (1. Derecha; 2. Izquierda; 3. Bilateral)  
 3 Ataxia/temblor, descoordinación \_\_\_\_\_ 19902 (1. Derecha; 2. Izquierda; 3. Bilateral)  
 |\_\_| 19903

**200. Motricidad**

- 1 Normal  
 2 Bradicinesia, hipomimía  
 3 Anormal por parálisis, describir \_\_\_\_\_ 00301 (1. Derecha; 2. Izquierda; 3. Bilateral)  
 |\_\_| 20001

**201. Movimientos anormales**

***Esta pregunta admite respuestas múltiples***

- 1 Ninguno, normal  
 2 Temblor en reposo  
 3 Temblor de intención  
 4 Mioclonías  
 5 Tics/discinesias/movimientos atáxicos  
 6 Temblor esencial |\_\_| 20101

**202. Tono muscular**

- 1 Normal  
 2 Rigidez o fenómeno de la rueda dentada  
 3 Espasticidad/clonus en una o varias extremidades  
 4 Tono muscular disminuido |\_\_| 20201

**203. Paresias**

- 1 Ninguna  
 2 Hemi/monoparesia a la derecha  
 3 Hemi/monoparesia izquierda  
 4 Paraparesia/tetraparesia |\_\_| 20301

**204. Grasset (brazos extendidos y palmas de la mano hacia arriba)**

Tomar resultado del ítem 187

- 1 Negativo (normal)
- 2 Descenso y/o pronación derecha
- 3 Descenso y/o pronación izquierda<sup>o</sup>

|\_\_| 20401

**205. Reflejos**

**Se admiten respuestas múltiples dentro de cada sección**

Anote código cuando proceda: 1. Sí; 2. No

a. Bíceps

- 1 Normales |\_\_| 20501
- 1 Hiperreflexia simétrica y bilateral |\_\_| 20302
- 1 Hiperreflexia derecha |\_\_| 20503
- 1 Hiperreflexia izquierda |\_\_| 20504
- 1 Hiporreflexia simétrica y bilateral |\_\_| 20505
- 1 Hipo/parareflexia derecha |\_\_| 20506
- 1 Hipo/parareflexia izquierda |\_\_| 20507

b. Patelar

- 1 Normales |\_\_| 20508
- 1 Hiperreflexia simétrica y bilateral |\_\_| 20509
- 1 Hiperreflexia derecha |\_\_| 20510
- 1 Hiperreflexia izquierda |\_\_| 20511
- 1 Hiporreflexia simétrica y bilateral |\_\_| 20512
- 1 Hipo/parareflexia derecha |\_\_| 20513
- 1 Hipo/parareflexia izquierda |\_\_| 20514

c. Babinski

- 1 Respuesta plantar bilateral normal |\_\_| 20515
- 1 Positiva derecha |\_\_| 20516
- 1 Positiva izquierda |\_\_| 20517
- 1 Positiva bilateral |\_\_| 20518

**206. Reflejos primitivos**

**Se admiten respuestas múltiples**

Anotar código cuando proceda: 1. Derecha; 2. Izquierda

- 1 Ninguno \_\_\_\_\_ 20601 |\_\_| 20602
- 1 Sí, reflejo de hocico \_\_\_\_\_ 20603 |\_\_| 20604
- 1 Sí, palmomentoniano \_\_\_\_\_ 20605 |\_\_| 20606
- 1 Sí, grasping \_\_\_\_\_ 20607 |\_\_| 20608

**207. Signos pseudobulbares**

- a. Disartria 1 Sí 2 No |\_\_| 20701
- b. Disfagia 1 Sí 2 No |\_\_| 20702
- c. Labilidad emocional 1 Sí 2 No |\_\_| 20703

**208. Nervios craneales**

**Se admiten respuestas múltiples**

- 1 Movimientos oculares y faciales normales |\_\_| 20801
- 1 Paresia parpebral, describir..... 20802 |\_\_| 20803
- 1 Paresia facial (central/periférica), describir..... 20804 |\_\_| 20805

**209. Reducción del campo visual**

- 1 Ninguna
- 2 Homónima izquierda
- 3 Homónima derecha
- 4 Otra, señalar, ..... 20901                    |\_\_|                    20902

**II. Exploración neurológica: Parkinsonismo**

***Recoger en caso de haber sido positivos los items previos relativas a marcha parkinsoniana, tándem, detenciones en los giros, bradicinesia, corporal o mímica, temblor de reposo, y rigidez con o sin rueda dentada (respuestas subrayadas)***

**210. Temblor**

***En caso asimétrico señalar código al lado: 1. Derecha; 2. Izquierda***

- 1 Ninguno
- 2 Ligero-intermitente                    \_\_\_\_\_ 21001
- 3 Ligero-moderado                    \_\_\_\_\_ 21002
- 4 Marcado                    \_\_\_\_\_ 21003                    |\_\_|                    21004

**211. Rigidez**

***En caso asimétrico señalar código al lado: 1. Derecha; 2. Izquierda***

- 1 Ninguna
- 2 Solo con la activación                    \_\_\_\_\_ 21101
- 3 Marcada                    \_\_\_\_\_ 21102
- 4 Ligera a moderada                    \_\_\_\_\_ 21103                    |\_\_|                    21104

**212. Marcha**

- 1 Normal
- 2 Lenta sin detenciones
- 3 Marcha con dificultades, puede fijarse al suelo
- 4 No puede caminar por sí mismo, necesita apoyo o asistencia                    |\_\_|                    21201

**213. Bradicinesia**

- 1 Ninguna
- 2 Mínimo enlentecimiento, dentro de los límites de la normalidad
- 3 Mínimo pero evidente
- 4 Moderado, con ciertas dudas o marcado con dificultades                    |\_\_|                    21301

**214. Levantarse de una silla**

- 1 Normal (puede haber mas de un intento)
- 2 Avanza los brazos
- 3 Caer hacia atrás, pero puede levantarse por sí mismo                    |\_\_|                    21401

**215. Postura**

- 1 Normal o antepropulsado (normal para la edad)
- 2 Anteversión, incluso lateralmente, incluyéndose además anteversión intensa con cifosis inmoderada inclinación lateral
- 3 Marcada tendencia a la flexión marcada con postura claramente anormal                    |\_\_|                    21501

**216. Estabilidad en la movilización**

***Realice un test de provocación empujando desde la espalda con paso hacia adelante***

- 1 Normal, puede dar un par de pasos y ponerse de pie espontáneamente)
- 2 Se cae si no le sujetan
- 3 Se cae espontáneamente, no puede mantenerse de pie                    |\_\_|                    21601

**217. Giros**

- 1 Giros de pequeña superficie, puede tener dudas pero mantiene la estabilidad
- 2 Gira lentamente con inseguridad
- 3 Caería sin ayuda, no puede girar |\_\_| 21701

**218. Mímica facial**

- 1 En el límite normal, (incluye ligera facies/jugador de poker)
- 2 Ligeramente disminuida, pérdida de la expresión facial normal
- 3 Moderada a marcada disfunción (pérdida total de la mímica facial) |\_\_| 21801

**219. Caídas en los últimos seis meses**

- 1 No se ha caído
- 2 Se ha caído una vez
- 3 Se ha caído dos o mas veces |\_\_| 21901

**Por favor, anote el tiempo transcurrido de la entrevista hasta este momento** |\_\_\_\_\_| 22001

## G. MEDICACIÓN

**Código en caso de ausencia de respuesta:**

*Por favor complete cada ítem con el número de opción o respuesta apropiados. En caso de ausencia de respuesta utilice el código 99 seguido de alguna de las especificaciones siguientes.*

1. No puede responder por trastorno cognitivo
2. No puede hacerlo por limitaciones físicas
3. Se niega
4. No es apropiado
5. Desconoce la respuesta
6. Otro

A continuación voy a preguntarle detalles sobre su medicación actual.

**221. ¿Toma de medicinas? ¿quién decide el uso de las medicinas?**

- 1 No toma medicinas
- 2 Toma medicinas por su cuenta
- 3 Toma medicinas recetadas por el médico
- 4 (2 + 3) |\_\_| 22101

**En caso negativo pase a la sección H**

**222. ¿Le ayuda alguien a tomar las medicinas?, ¿quizá a ordenar las medicinas?, ¿quizá a administrar las medicinas?**

- 1 El propio enfermo cuida su medicación
- 2 Se reparten en un dosificador por parte de \_\_\_\_\_ 22201

*¿quien? p.ej., ayuda a domicilio, esposo, esposa).*

- 3 Se distribuye por parte de la farmacia en un formato particular
- 4 El anciano tiene ayuda de otra persona para tomar sus medicinas, ¿de quién? \_\_\_\_\_ 22202

|\_\_| 22203



223. Medicación actual:

**Incluir alimentos dietéticos y fármacos naturales**

| Nombre comercial del fármaco           | Forma de administración | Tipo de preparado* | Contenido de una unidad (mg) | Dosis diaria (en unidades) | Si según necesidad (frecuencia durante un mes) | Tratamiento breve (sí/no) | Fecha aproximada de comienzo | Inicio de tratamiento según documentos o datos del entrevistador | Indicación según datos de la persona | Problemas (según ítem 224 en página siguiente) Poner letra y número. Ver Ejemplo |
|----------------------------------------|-------------------------|--------------------|------------------------------|----------------------------|------------------------------------------------|---------------------------|------------------------------|------------------------------------------------------------------|--------------------------------------|----------------------------------------------------------------------------------|
| <b>(EJEMPLO)<br/>TENORMIN<br/>50mg</b> | <b>ORAL</b>             | <b>1</b>           | <b>50 mg</b>                 | <b>1</b>                   | <b>DIARIO</b>                                  | <b>NO</b>                 | <b>15 / 05 / 05</b>          | <b>15 / 05 / 05</b>                                              | <b>14 / 05 / 05</b>                  | <b>b.2</b>                                                                       |
|                                        |                         |                    |                              |                            |                                                |                           | / /                          |                                                                  |                                      |                                                                                  |
|                                        |                         |                    |                              |                            |                                                |                           | / /                          |                                                                  |                                      |                                                                                  |
|                                        |                         |                    |                              |                            |                                                |                           | / /                          |                                                                  |                                      |                                                                                  |
|                                        |                         |                    |                              |                            |                                                |                           | / /                          |                                                                  |                                      |                                                                                  |
|                                        |                         |                    |                              |                            |                                                |                           | / /                          |                                                                  |                                      |                                                                                  |
|                                        |                         |                    |                              |                            |                                                |                           | / /                          |                                                                  |                                      |                                                                                  |
|                                        |                         |                    |                              |                            |                                                |                           | / /                          |                                                                  |                                      |                                                                                  |

(\*). Especifique tipo de preparado: 1. Tabletas/efervescente/depot; 2. En polvo; 3. Inyección; 4. Crema; 5. Apósito; 6. Cápsula/cápsula en depósito; 7. Sobre granulado; 8. Spray; 9. Solución o jarabe; 10. Mezcla; 11. Inhalador; 12. Supositorio; 13. Pomada

224. ¿Ha tenido dificultades con sus medicinas durante el último mes?

**Señale qué fármacos le han solucionado el problema, codificar después la alternativa más adecuada de acuerdo con la lista de abajo. Mirar la última columna de la página anterior**

*Código: 1. No; 2. Problemas mínimos; 3. Problemas moderados; 4. Problemas importantes*

- |                                                                              |    |       |
|------------------------------------------------------------------------------|----|-------|
| a. Dificultades para abrir el envase                                         | __ | 22401 |
| b. Dificultades para comprender las informaciones de la receta               | __ | 22402 |
| c. La dosificación era incómoda, acordarse de todas las tabletas             | __ | 22403 |
| d. Es difícil tomar tantas tabletas a la vez                                 | __ | 22405 |
| e. Es difícil obtener los fármacos en la farmacia en el momento adecuado     | __ | 22406 |
| f. Era difícil pagar las medicinas                                           | __ | 22407 |
| g. Estaba muy preocupado por tomar tantas medicinas                          | __ | 22408 |
| h. Era difícil tomar la medicina (p.ej., tragar, dejar caer las gotas, etc.) | __ | 22409 |

225. ¿De qué modo obtiene por parte de la persona entrevistada la información acerca de las medicinas?

- |                                                                                                        |    |       |
|--------------------------------------------------------------------------------------------------------|----|-------|
| 1 Ninguna medicina                                                                                     |    |       |
| 2 Se han mostrado la receta                                                                            |    |       |
| 3 Se han mostrado las cajas                                                                            |    |       |
| 4 (1+2)                                                                                                |    |       |
| 5 Medicamentos cardex o información de otras personas (familiar, personal asistencial sanitario, etc). |    |       |
| 6 La persona lo dijo de memoria                                                                        |    |       |
| 7 (1 + 5)                                                                                              |    |       |
| 8 (2 + 5)                                                                                              |    |       |
| 9 (3 + 5)                                                                                              |    |       |
| 10 (4 + 5)                                                                                             | __ | 22501 |

226. ¿Se han utilizado anteriormente, independientemente de la medicación que reciba actualmente, los siguientes grupos de fármacos?

**Señale el nombre de los fármacos en la lista especial**

- |                                 |    |       |
|---------------------------------|----|-------|
| 1 Estrógenos                    | __ | 22601 |
| 2 Antirreumáticos               | __ | 22602 |
| 3 Ácido acetilsalicílico        | __ | 22603 |
| 4 Corticoides                   | __ | 22604 |
| 5 Psicofármacos                 | __ | 22605 |
| 6 Neurolépticos                 | __ | 22506 |
| 7 Antidepresivos                | __ | 22607 |
| 8 Benzodiazepinas               | __ | 22608 |
| 9 Otros psicofármacos           | __ | 22609 |
| 10 Medicación antiparkinsoniana | __ | 22610 |

**En caso de marcar alguna de las opciones previas, transcribir el protocolo de administración en la pregunta 227**

**227. Protocolo de medicación:**

***Si el preparado se ha administrado en distintos periodos detallar cada una nota para cada una de ellos***

|     | Preparado, contenido de la unidad (mg), dosis (uds) | Fecha comienzo* | Fecha finalización | Administración periódica ** |
|-----|-----------------------------------------------------|-----------------|--------------------|-----------------------------|
| 1.  | _____                                               | / /             | / /                | _____                       |
| 2.  | _____                                               | / /             | / /                | _____                       |
| 3.  | _____                                               | / /             | / /                | _____                       |
| 4.  | _____                                               | / /             | / /                | _____                       |
| 5.  | _____                                               | / /             | / /                | _____                       |
| 6.  | _____                                               | / /             | / /                | _____                       |
| 7.  | _____                                               | / /             | / /                | _____                       |
| 8.  | _____                                               | / /             | / /                | _____                       |
| 9.  | _____                                               | / /             | / /                | _____                       |
| 10. | _____                                               | / /             | / /                | _____                       |

\*Con tanta precisión como sea posible.

\*\*Con qué frecuencia y durante cuanto tiempo.

**228. ¿De qué modo obtiene por parte de la persona entrevistada la información acerca de las medicinas?**

- 1 Ninguna medicina
- 2 Le han mostrado la receta
- 3 Le han mostrado las cajas
- 4 (1+2)
- 5 Medicamentos cardex o información de otras personas (familiar, personal asistencial sanitario, etc).
- 6 La persona lo dijo de memoria
- 7 (1 + 5)
- 8 (2 + 5)
- 9 (3 + 5)
- 10 (4 + 5)

|\_\_| 22801

**H. RESUMEN DE HISTORIA CLÍNICA Y UTILIZACIÓN DE SERVICIOS**

**Código en caso de ausencia de respuesta:**

*Por favor complete cada ítem con el número de opción o respuesta apropiados. En caso de ausencia de respuesta utilice el código 99 seguido de alguna de las especificaciones siguientes.*

- 1. No puede responder por trastorno cognitivo
- 2. No puede hacerlo por limitaciones físicas
- 3. Se niega
- 4. No es apropiado
- 5. Desconoce la respuesta
- 6. Otro

**Las preguntas expresadas en los enunciados de esta sección van dirigidas exclusivamente al entrevistador. Por favor realice cuantas preguntas considere oportunas y revise toda la documentación clínica disponible para contestar adecuadamente este apartado de acuerdo a su propio juicio.**

**230. Aparato circulatorio:** ¿Ha presentado la persona entrevistada alguna enfermedad o tratamiento de los señalados a continuación?

- a. Angina
- b. Infarto de Miocardio
- c. Cirugía cardiaca
- d. Insuficiencia cardiaca
- e. Arritmia
- f. Otras enfermedades cardiacas
- g. Hipertensión arterial

| Condición o intervención* | Edad inicio | Tipo** | Tratamiento*** | Año   | Hospital | AT**** |
|---------------------------|-------------|--------|----------------|-------|----------|--------|
| 1. ....                   | .....       | .....  | .....          | ..... | .....    | .....  |
| 2. ....                   | .....       | .....  | .....          | ..... | .....    | .....  |
| 3. ....                   | .....       | .....  | .....          | ..... | .....    | .....  |
| 4. ....                   | .....       | .....  | .....          | ..... | .....    | .....  |
| 5. ....                   | .....       | .....  | .....          | ..... | .....    | .....  |
| 6. ....                   | .....       | .....  | .....          | ..... | .....    | .....  |
| 7. ....                   | .....       | .....  | .....          | ..... | .....    | .....  |

(\*). Indique únicamente la letra que identifica la enfermedad o tratamiento

(\*\*). Especificar código CIE-10 (a completar en gabinete)

(\*\*\*). 1. Ambulatoria; 2. Ingreso hospitalario; 3. Otra, especificar (p.ej., tipo de intervención quirúrgica o farmacológica)

(\*\*\*\*). En el caso de cardiopatía o hipertensión arterial, especificar el intervalo en años si la condición se dio anteriormente

**231. Enfermedad cerebrovascular:** ¿Ha presentado la persona entrevistada alguna enfermedad de las señaladas a continuación?

- a. Accidente isquémico transitorio (AIT)
- b. Ictus

| Condición | Edad inicio | Tipo* | Tratamiento** | Año   | Hospital | AT*** |
|-----------|-------------|-------|---------------|-------|----------|-------|
| 1. ....   | .....       | ..... | .....         | ..... | .....    | ..... |
| 2. ....   | .....       | ..... | .....         | ..... | .....    | ..... |

(\*). Especificar código CIE-10 (a completar en gabinete)

(\*\*). 1. Ambulatoria; 2. Ingreso hospitalario; 3. Otra, especificar (p.ej., tipo de intervención quirúrgica o farmacológica)

(\*\*\*). Especificar el intervalo en años si la condición se dio anteriormente

**232. Otras enfermedades neurológicas:** ¿Ha presentado la persona entrevistada alguna enfermedad de las señaladas a continuación?

- a. Traumatismo craneal con pérdida de conciencia
- b. Epilepsia
- c. Enfermedad de Parkinson
- d. Otras enfermedades neurológicas

|    | Condición | Edad inicio | Tipo* | Tratamiento** | Año   | Hospital | AT***       |
|----|-----------|-------------|-------|---------------|-------|----------|-------------|
| 1. | .....     | .....       | ..... | .....         | ..... | .....    | .....-..... |
| 2. | .....     | .....       | ..... | .....         | ..... | .....    | .....-..... |
| 3. | .....     | .....       | ..... | .....         | ..... | .....    | .....-..... |
| 4. | .....     | .....       | ..... | .....         | ..... | .....    | .....-..... |

(\*). Especificar código CIE-10 (a completar en gabinete)

(\*\*) 1. Ambulatoria; 2. Ingreso hospitalario; 3. Otra, especificar (p.ej., tipo de intervención quirúrgica o farmacológica)

(\*\*\*) Especificar el intervalo en años si la condición se dio anteriormente

**233. Enfermedades del aparato respiratorio:** ¿Ha presentado la persona entrevistada alguna enfermedad o condición de las señaladas a continuación?

- a. Asma
- b. Enfermedad pulmonar obstructiva/enfisema pulmonar
- c. Ronquidos
- d. Apnea de sueño
- e. Tabaquismo
- f. Otras enfermedades del aparato respiratorio

|    | Condición | Edad inicio | Tipo* | Tratamiento** | Año   | Hospital | AT***       |
|----|-----------|-------------|-------|---------------|-------|----------|-------------|
| 1. | .....     | .....       | ..... | .....         | ..... | .....    | .....-..... |
| 2. | .....     | .....       | ..... | .....         | ..... | .....    | .....-..... |
| 3. | .....     | .....       | ..... | .....         | ..... | .....    | .....-..... |
| 4. | .....     | .....       | ..... | .....         | ..... | .....    | .....-..... |
| 5. | .....     | .....       | ..... | .....         | ..... | .....    | .....-..... |
| 6. | .....     | .....       | ..... | .....         | ..... | .....    | .....-..... |

(\*). En el caso de tabaquismo indique número de cigarrillos diarios y: 1. Fuma todos los días; 2. No fuma en la actualidad aunque lo ha hecho anteriormente

(\*\*) 1. Ambulatoria; 2. Ingreso hospitalario; 3. Otra, especificar (p.ej., tipo de intervención quirúrgica o farmacológica)

(\*\*\*) Especificar el intervalo en años si la condición se dio anteriormente

**234. Enfermedades oftalmológicas:** ¿Ha presentado la persona entrevistada alguna enfermedad de las señaladas a continuación?

- a. Cataratas
- b. Glaucoma
- c. Degeneración macular, retinopatía degenerativa
- d. Otras enfermedades oftalmológicas



(\*) Especificar código CIE-10 (a completar en gabinete). En el caso de Diabetes tipo II, especificar: 1. dietético; 2. 1+ tableta; 3. 1+ insulina; 4. los tres

(\*\*) 1. Ambulatoria; 2. Ingreso hospitalario; 3. Otra, especificar (p.ej., tipo de intervención quirúrgica o farmacológica)

(\*\*\*) Especificar el intervalo en años si la condición se dio anteriormente

**237. Fracturas y enfermedades del sistema locomotor:** ¿Ha presentado la persona entrevistada alguna enfermedad de las señaladas a continuación?

- a. Artrosis
- b. Fractura de cadera
- c. Otra fractura
- d. Aplastamiento vertebral
- e. Osteoporosis

|    | Condición | Edad inicio | Tipo* | Tratamiento** | Año   | Hospital | AT*** |
|----|-----------|-------------|-------|---------------|-------|----------|-------|
| 1. | .....     | .....       | ..... | .....         | ..... | .....    | ..... |
| 2. | .....     | .....       | ..... | .....         | ..... | .....    | ..... |
| 3. | .....     | .....       | ..... | .....         | ..... | .....    | ..... |
| 4. | .....     | .....       | ..... | .....         | ..... | .....    | ..... |

(\*) Especificar código CIE-10 (a completar en gabinete). En el caso de Fractura de cadera o de otra fractura, especificar: 1. derecha; 2. izquierda. En caso de aplastamiento vertebral indicar: 1. torácica; 2. lumbar; 3. 1+2

(\*\*) 1. Ambulatoria; 2. Ingreso hospitalario; 3. Otra, especificar (p.ej., tipo de intervención quirúrgica o farmacológica)

(\*\*\*) Especificar el intervalo en años si la condición se dio anteriormente

**238. Enfermedades infecciosas:** ¿Ha presentado la persona entrevistada alguna enfermedad de las señaladas a continuación?

- a. Meningitis o encefalitis
- b. Polio
- c. Tuberculosis
- d. Borreliosis
- e. Otra infección

|    | Enfermedad | Edad inicio | Tipo* | Tratamiento** | Año   | Hospital | AT*** |
|----|------------|-------------|-------|---------------|-------|----------|-------|
| 1. | .....      | .....       | ..... | .....         | ..... | .....    | ..... |
| 2. | .....      | .....       | ..... | .....         | ..... | .....    | ..... |
| 3. | .....      | .....       | ..... | .....         | ..... | .....    | ..... |
| 4. | .....      | .....       | ..... | .....         | ..... | .....    | ..... |
| 5. | .....      | .....       | ..... | .....         | ..... | .....    | ..... |
| 6. | .....      | .....       | ..... | .....         | ..... | .....    | ..... |

(\*) Especificar código CIE-10 (a completar en gabinete). En caso de tuberculosis, especificar: 1. Pulmonar; 2. Renal; 3. Sistema nervioso

(\*\*) 1. Ambulatoria; 2. Ingreso hospitalario; 3. Otra, especificar (p.ej., tipo de intervención quirúrgica o farmacológica)

(\*\*\*) Especificar el intervalo en años si la condición se dio anteriormente

**239. Cáncer:** ¿Ha presentado algún trastorno oncológico de los tipos y localizaciones señalados a continuación?

- a. Labio, cavidad bucal y faringe
- b. Órganos digestivos
- c. Órganos respiratorios e intratorácicos
- d. Huesos y cartílagos articulares
- e. Piel
- f. Tejidos mesoteliales y tejidos blandos
- g. Mama
- h. Órganos genitales femeninos
- i. Órganos genitales masculinos
- j. Vías urinarias
- k. Ojo, encéfalo u otras partes del sistema nervioso central
- l. Tumores malignos de sitios mal definidos, secundarios y de sitios no especificados
- m. Tumores malignos (declarados o presuntos como primarios) del tejido linfático, de los órganos hematopoyéticos y de tejidos afines
- n. Tumores malignos (primarios) de sitios múltiples independientes
- ñ. Tumores in situ
- o. Tumores benignos
- p. Tumores de comportamiento incierto o desconocido

|     | Enfermedad | Edad inicio | Tipo* | Tratamiento** | Año   | Hospital | AT*** |
|-----|------------|-------------|-------|---------------|-------|----------|-------|
| 1.  | .....      | .....       | ..... | .....         | ..... | .....    | ..... |
| 2.  | .....      | .....       | ..... | .....         | ..... | .....    | ..... |
| 3.  | .....      | .....       | ..... | .....         | ..... | .....    | ..... |
| 4.  | .....      | .....       | ..... | .....         | ..... | .....    | ..... |
| 5.  | .....      | .....       | ..... | .....         | ..... | .....    | ..... |
| 6.  | .....      | .....       | ..... | .....         | ..... | .....    | ..... |
| 7.  | .....      | .....       | ..... | .....         | ..... | .....    | ..... |
| 8.  | .....      | .....       | ..... | .....         | ..... | .....    | ..... |
| 9.  | .....      | .....       | ..... | .....         | ..... | .....    | ..... |
| 10. | .....      | .....       | ..... | .....         | ..... | .....    | ..... |

(\*) Especificar código CIE-10 (a completar en gabinete)  
 (\*\*) Especificar tipo de atención recibida: 1. Ambulatoria; 2. Ingreso hospitalario y tipo de tratamiento: 1. Operación; 2. Quimioterapia; 3. Radioterapia  
 (\*\*\*) Especificar el intervalo en años si la condición se dio anteriormente



**240. Trastornos mentales:** ¿Ha presentado la persona entrevistada alguna de las condiciones o trastornos de los señalados a continuación?

- a. Depresión (previamente)
- b. Psicosis (enfermedad bipolar, esquizofrenia)
- c. Demencia o episodios confusionales
- d. Estrés Psicológico
- e. Trastornos del desarrollo (retraso mental, etc.)
- f. Otras manifestaciones (trastornos de ansiedad, del sueño, de personalidad, etc.)

| Trastorno | Edad inicio | Tipo* | Tratamiento** | Año   | Hospital | AT*** |
|-----------|-------------|-------|---------------|-------|----------|-------|
| 1. ....   | .....       | ..... | .....         | ..... | .....    | ..... |
| 2. ....   | .....       | ..... | .....         | ..... | .....    | ..... |
| 3. ....   | .....       | ..... | .....         | ..... | .....    | ..... |
| 4. ....   | .....       | ..... | .....         | ..... | .....    | ..... |
| 5. ....   | .....       | ..... | .....         | ..... | .....    | ..... |
| 6. ....   | .....       | ..... | .....         | ..... | .....    | ..... |

(\*) Especificar código CIE-10 (a completar en gabinete)

(\*\*) Especifique tipo de atención recibida: 1. Ambulatoria; 2. Ingreso hospitalario y modalidad terapéutica: 1. farmacológica; 2. cirugía o electroshock; 3. psicoterapéutica psicodinámica; 4. psicoterapéutica cognitivo-conductual; 5. Otras psicoterapias; 6. combinación fármacos-psicoterapia

(\*\*\*) Especificar el intervalo en años si la condición se dio anteriormente

**241. Otras enfermedades (urológicas, gastroenterológicas, ginecológicas o de la piel):** ¿Ha presentado la persona entrevistada alguna otra enfermedad no señalada previamente?

| Enfermedad | Edad inicio | Tipo* | Tratamiento** | Año   | Hospital | AT*** |
|------------|-------------|-------|---------------|-------|----------|-------|
| 1. ....    | .....       | ..... | .....         | ..... | .....    | ..... |
| 2. ....    | .....       | ..... | .....         | ..... | .....    | ..... |
| 3. ....    | .....       | ..... | .....         | ..... | .....    | ..... |
| 4. ....    | .....       | ..... | .....         | ..... | .....    | ..... |
| 5. ....    | .....       | ..... | .....         | ..... | .....    | ..... |

(\*) Especifique código CIE-10 siempre que sea posible.

(\*\*) 1. Ambulatoria; 2. Ingreso hospitalario; 3. Otra, especificar (p.ej., tipo de intervención quirúrgica o farmacológica)

(\*\*\*) Especificar el intervalo en años si la condición se dio anteriormente

## I. ESCALA DE IMPACTO FUNCIONAL DE ENFERMEDADES POR ÓRGANOS, APARATOS O SISTEMAS

*Por favor use los códigos siguientes para calificar cada órgano o sistema:*

|              |                                                                                                     |
|--------------|-----------------------------------------------------------------------------------------------------|
| 1. Ninguna   | Ninguna pérdida de función en este sistema u órgano                                                 |
| 2. Leve      | Leve pérdida de función que no altera la actividad normal, tratamiento no siempre necesario         |
| 3. Moderado  | Pérdida de función que altera la actividad normal del individuo y requiere tratamiento              |
| 4. Grave     | La pérdida de función es notablemente discapacitante y demanda tratamiento inmediato                |
| 5. Muy grave | Pérdida de función que supone riesgo vital y demanda tratamiento inmediato o no es posible tratarlo |

### Código en caso de ausencia de respuesta:

*Por favor complete cada ítem con el número de opción o respuesta apropiados. En caso de ausencia de respuesta utilice el código 99 seguido de alguna de las especificaciones siguientes.*

1. No puede responder por trastorno cognitivo
2. No puede hacerlo por limitaciones físicas
3. Se niega
4. No es apropiado
5. Desconoce la respuesta
6. Otro

243. Corazón |\_\_| 24301

**Solamente**

244. Hipertensión |\_\_| 24401

**El puntaje se basa en la gravedad. Los diferentes órganos se puntúan en los ítems a continuación**

245. Aparato circulatorio |\_\_| 24501

**Incluidos sangre, vasos, células sanguíneas, médula, ganglios linfáticos, bazo**

246. Aparato respiratorio |\_\_| 24601

**Pulmón, bronquios, tráquea, laringe**

247. Ojos y garganta, nariz y oído |\_\_| 24701

248. Órganos gastrointestinales y tracto gastrointestinal inferior |\_\_| 24801

249. Hígado |\_\_| 24901

**Solamente**

250. Riñón |\_\_| 25001

**Solamente**

251. Aparato genital y urinario  25101

**Uretra, próstata, vejiga y genitales**

252. Sistema músculoesquelético y piel  25201

253. Sistema endocrino y metabólico  25301

**Incluye diabetes, diseminada, intoxicación**

254. Sistema nervioso I  25401

**Cerebro, médula, nervios periféricos, no incluye demencia**

255. Sistema nervioso II: Demencia y deterioro cognitivo  25501

256. Trastornos psiquiátricos y de conducta  25601

**Incluye depresión, ansiedad, agitación, psicosis, no incluye demencia**

257. Notas  25701

- 1 Hay notas
- 2 No hay notas

.....  
 .....  
 ..... 25702

258. La entrevista ha sido contestada por:

- 1 Por la persona entrevistada
- 2 Por un familiar o amigo, especificar \_\_\_\_\_ 25801

**1: Esposo/a, Pareja; 2: Padre/Madre, Suegro/Suegra; 3: Hijo/a; 4: Yerno, Nuera; 5: Nieto/a; 6: Hermano/a, Cuñado/a; 7: Otro Familiar; 8: Empleado/a de hogar, persona de servicio; 9: Otras Personas; 10: el entrevistador**

- 3 Por la persona entrevistada con la ayuda de un familiar o amigo, especificar \_\_\_\_\_ 25802

**(En caso de que la persona entrevistada haya requerido ayuda en al menos una sección)**

25803

**En caso de que la entrevista haya sido contestada con la ayuda de un familiar o amigo, especificar (marque un uno en la casilla correspondiente):**

258.a Secciones contestadas fundamentalmente por el entrevistado (1. Si; 2. No)

- 1 Consentimiento informado  25804
- 1 Depresión y estado mental (GMS-B)  25805
- 1 Cribaje neurológico (Test OMS)  25806
- 1 Examen clínico general (SNAC-K)  25807

258.b Secciones contestadas fundamentalmente por el familiar o amigo (1. Si; 2. No)

- 1 Consentimiento informado  25808
- 1 Depresión y estado mental (GMS-B)  25809
- 1 Cribaje neurológico (Test OMS)  25810
- 1 Examen clínico general (SNAC-K)  25811

**Por favor, anote el tiempo transcurrido de la entrevista hasta este momento** | \_\_\_\_\_ | 25901

**Por favor revise rápidamente el cuadernillo y cerciórese de que todas las secciones han sido cumplimentadas correctamente y todos los ítems han sido administrados o, en caso de ausencia de respuesta, han sido codificados adecuadamente**

**Por favor si no obtuvo el consentimiento informado por escrito al comienzo de la entrevista obténgalo en este momento**

**La entrevista termina aquí**

## **I. RECAPITULACIÓN: DIAGNÓSTICOS, ESTADO DE SALUD ACTUAL Y CRIBAJES**

***Esta sección va dirigida al entrevistador y debe ser completada en el despacho***

Uno de los objetivos de este estudio es detectar la presencia de ciertas enfermedades no diagnosticadas con repercusión sobre la discapacidad. Esta entrevista-examen (cuaderno A) posibilita: 1) el cribaje neurológico y cognitivo; 2) el diagnóstico de ciertos síndromes neurológicos o psiquiátricos; 3) la identificación de diagnósticos establecidos por los servicios sanitarios, y 4) la evaluación del impacto actual de la patología observada sobre la capacidad funcional. La segunda entrevista (cuaderno B), orientada hacia el funcionamiento y la calidad de vida, se desarrolla de forma independientemente del conocimiento diagnóstico.

Esta sección ha de ser un trabajo conjunto y de despacho de los entrevistadores médico y psicosocial y del responsable del equipo investigador local, destinada a evaluar dos aspectos; uno relacionado con objetivos del estudio longitudinal y otro sobre la estimación de la prevalencia de demencias:

1. Los investigadores evaluarán la existencia de pérdida de función-discapacidad constatada en los cuadernos A y B que no puedan explicarse por la patología hasta el momento identificada (cuadro 1) y la existencia de positividad al cribaje tanto neurológico como cognitivo (cuadro 2). La constatación de este tipo de pérdida de función en el momento del estudio longitudinal implicará la comunicación con el médico de cabecera acerca de la conveniencia de continuar el estudio diagnóstico (p.ej., si se identifica una inestabilidad en la marcha o una astenia importante de causa no conocida).

2. El segundo objetivo se refiere a la pertinencia de iniciar la fase de post-cribaje del estudio de prevalencia de demencias que incluye su clasificación etiológica. Ello supone el estudio diagnóstico y protocolizado de la demencia, la filiación del parkinsonismo en caso de que acompañe al cuadro y la identificación de posibles antecedentes de enfermedad cerebrovascular. El resultado de este cribaje y el diagnóstico se registrarán en el cuadro 2. Cada grupo interesado y capacitado por las condiciones del medio geográfico/social para contribuir al estudio de prevalencia de demencias recibirá para su uso en segunda fase un protocolo diagnóstico estándar de demencias. Es importante señalar que a diferencia del cribaje cognitivo el cribaje neurológico no es objeto de segunda fase; su aplicación se llevará a cabo en el marco del estudio longitudinal.

**Cuadro 1.** Concordancia de diagnósticos establecidos o validados por entrevista/examen con el nivel de discapacidad consensuado por entrevistadores médico (impacto estimado de la pérdida de función por O/A/S en discapacidad) y psico-social (WHO-DAS II y Katz)

|                                                                               |         | Clasificaciones CIE-10 | Concordancia de diagnósticos con impacto en discapacidad |    |   |    |    |       |
|-------------------------------------------------------------------------------|---------|------------------------|----------------------------------------------------------|----|---|----|----|-------|
| <b>Diagnósticos GMS-HAS</b><br>(Secc. II-8, ítem 150, pág. 28)                | 1. .... | .....                  | 1                                                        | Sí | 2 | No | __ | 00201 |
|                                                                               | 2. .... | .....                  | 1                                                        | Sí | 2 | No | __ | 00201 |
|                                                                               | 3. .... | .....                  | 1                                                        | Sí | 2 | No | __ | 00201 |
|                                                                               | 4. .... | .....                  | 1                                                        | Sí | 2 | No | __ | 00201 |
| <b>Diagnósticos enfermedades físicas en la actualidad</b>                     | 1. .... | .....                  | 1                                                        | Sí | 2 | No | __ | 00201 |
|                                                                               | 2. .... | .....                  | 1                                                        | Sí | 2 | No | __ | 00201 |
|                                                                               | 3. .... | .....                  | 1                                                        | Sí | 2 | No | __ | 00201 |
|                                                                               | 4. .... | .....                  | 1                                                        | Sí | 2 | No | __ | 00201 |
| <b>Ambos tipos de diagnósticos conjuntamente y sus niveles de gravedad...</b> |         |                        | ¿Explican el nivel de discapacidad constatado?           |    |   |    |    |       |
|                                                                               |         |                        | 1                                                        | Sí | 2 | No | __ | 00201 |

**Cuadro 2.** Positividad a cribajes y planificación de recogida de datos para la segunda fase (estudio de prevalencia de demencias por tipos etiológicos según protocolo, se incluyen la identificación de historia clínica cerebrovascular y del tipo de parkinsonismos entre los positivos al cribaje neurológico)

|                                                                                   |                                                      |       |   |    |   |    |    |       |
|-----------------------------------------------------------------------------------|------------------------------------------------------|-------|---|----|---|----|----|-------|
| <b>Positividad al cribaje neurológico</b><br>(Secc. E, ítems 178-193, pág. 33-35) | En al menos una pregunta o tarea                     |       | 1 | Sí | 2 | No | __ | 00201 |
|                                                                                   | Sospecha de presencia de patología no diagnosticada* |       | 1 | Sí | 2 | No | __ | 00201 |
|                                                                                   | Documentación clínica disponible                     |       | 1 | Sí | 2 | No | __ | 00201 |
|                                                                                   | Hospital/centro                                      | ..... |   |    |   |    |    |       |
| <b>Positividad al cribaje cognitivo</b><br>(Secc. I-1.3, ítems 28-39, pág. 12-14) | MEC < 24 puntos                                      |       | 1 | Sí | 2 | No | __ | 00201 |
|                                                                                   | Se sospecha patología no diagnosticada*              |       | 1 | Sí | 2 | No | __ | 00201 |
|                                                                                   | Pertinencia de estudio protocolizado en segunda fase |       | 1 | Sí | 2 | No | __ | 00201 |
|                                                                                   | Documentación clínica disponible                     |       | 1 | Sí | 2 | No | __ | 00201 |
| Hospital/centro                                                                   | .....                                                |       |   |    |   |    |    |       |

(\*). Incluir solo patologías relacionada con la positividad a los cribajes que sean capaces de explicar el diferencial de discapacidad no atribuible a enfermedad reconocida

Clínico responsable del en segunda fase (i.e., estudio diagnóstico de demencia y subtipos)

Nombre y apellidos \_\_\_\_\_

Hospital Centro Sanitario \_\_\_\_\_

Teléfono de contacto \_\_\_\_\_

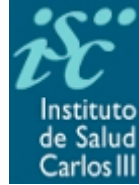

Centro Nacional de Epidemiología

# Estudio longitudinal del envejecimiento de poblaciones españolas

## **Cuaderno B**

### **Función y calidad de vida**

Número de entrevista    00001

Código de provincia   00002

# Índice

---

|                                                                    |    |
|--------------------------------------------------------------------|----|
| <b>A. IDENTIFICACIÓN DEL ENTREVISTADO</b>                          | 4  |
| <b>B. MEDIDAS ANTROPOMÉTRICAS</b>                                  | 5  |
| <b>C. DISCAPACIDAD</b>                                             | 6  |
| <b>I. Cuestionario para la Discapacidad WHO-DAS II (12 ítems)</b>  | 7  |
| <b>II. Cuestionario para la Discapacidad WHO-DAS II (36 ítems)</b> | 7  |
| <i>II-1. Datos demográficos y de índole general</i>                | 8  |
| <i>II-2. Preámbulo</i>                                             | 8  |
| <i>II-3. Comprensión y comunicación</i>                            | 9  |
| <i>II-4. Capacidad para moverse en su alrededor/entorno</i>        | 9  |
| <i>II-5. Cuidado personal</i>                                      | 10 |
| <i>II-6. Relacionarse con otras personas</i>                       | 10 |
| <i>II-7. Actividades de la vida diaria</i>                         | 11 |
| <i>II-8. Actividad laboral</i>                                     | 11 |
| <i>II-9. Participación en sociedad</i>                             | 12 |
| <b>III. Índice de Katz</b>                                         | 13 |
| <b>D. CALIDAD DE VIDA (EuroQoL)</b>                                | 15 |
| <b>E. EVALUACIÓN DEL ESTADO NUTRICIONAL (MNA)</b>                  | 16 |
| <b>I. Cribaje</b>                                                  | 16 |
| <b>II. Evaluación</b>                                              | 18 |
| <b>F. FACTORES SOCIALES</b>                                        | 21 |
| <b>I. Hogar y relación de parentesco</b>                           | 21 |
| <b>II. Entorno físico: Vivienda</b>                                | 21 |
| <b>III. Entorno social: Red, apoyo y participación</b>             | 22 |
| <i>III-1. Red familiar y social</i>                                | 22 |
| <i>III-2. Apoyo Social</i>                                         | 23 |
| <i>III-3. Participación Social</i>                                 | 23 |
| <b>IV. Estudios, relación con la actividad y ocupación</b>         | 25 |
| <b>V. Situación económica</b>                                      | 26 |

---



---

|                                             |    |
|---------------------------------------------|----|
| <b>G. AFRONTAMIENTO (SOC)</b>               | 27 |
| <b>H. CARGA DEL CUIDADOR (Zarit)</b>        | 29 |
| <b>I. AFRONTAMIENTO DEL CUIDADOR (ISPE)</b> | 31 |
| <b>J. MATERIALES ADICIONALES</b>            | 33 |

---

*Estimada/o colega, este es el cuestionario sobre función y calidad de vida del estudio longitudinal del envejecimiento de poblaciones españolas diseñado por el Grupo Español de Estudios Epidemiológicos del Envejecimiento. Este cuadernillo está diseñado para que Vd. lea los enunciados en voz alta al participante; los mensajes tabulados en cursiva están dirigidos a Vd. y por tanto no deben ser leídos en voz alta. Por favor lea atentamente las instrucciones correspondientes a cada sección.*

## A. IDENTIFICACIÓN DEL ENTREVISTADO

### Código en caso de ausencia de respuesta:

*Por favor complete cada ítem con el número de opción o respuesta apropiados. En caso de ausencia de respuesta utilice el código 99 seguido de alguna de las especificaciones siguientes.*

1. No puede responder por trastorno cognitivo
2. No puede hacerlo por limitaciones físicas
3. Se niega
4. No es apropiado
5. Desconoce la respuesta
6. Otro

### 1. Identificación del entrevistado

Nombre : \_\_\_\_\_ 00101

Dirección postal: \_\_\_\_\_ 00102

Código postal:      00103

Teléfono para contactos posteriores: \_\_\_\_\_ 00104

Fecha de la entrevista: \_\_\_\_\_ 00105

### 2. Muestra

**Completar por el entrevistador antes de iniciar la entrevista, marque solo una respuesta**

- 1 Población general
- 2 Problemas relacionados con las drogas
- 3 Problemas de salud mental
- 4 Problemas físicos |\_\_| 00201
- 5 Otros (especificar: \_\_\_\_\_ ) 00201

### 3. Sexo

**Según apariencia**

- 1 Femenino
  - 2 Masculino |\_\_| 00301
4. ¿Qué edad tiene? años \_\_\_\_ / \_\_\_\_ 00401
5. ¿Cuál es la fecha exacta de su nacimiento?  
**Formato DD/MM/AAAA** \_\_\_\_ / \_\_\_\_ / \_\_\_\_ 00501

6. ¿Cuál es su estado civil actual?

**Seleccione la opción más adecuada**

- 1 Soltero/a
- 2 Casado/a
- 3 Separado/a
- 4 Divorciado/a
- 5 Viudo/a
- 6 Viviendo en pareja

|\_\_| 00601

7. Identificación del hábitat de residencia (municipio, provincia, tamaño municipal, condiciones vivienda).

Nombre del municipio \_\_\_\_\_ 00701

Código INE (\*)     00702

Nombre de la provincia \_\_\_\_\_ 00703

Tamaño municipal (nº habitantes) (\*) \_\_\_\_\_ 00704

¿Tiene ascensor la vivienda? Sí 1 No 2 |\_\_| 00705

Para acceder a la vivienda es necesario el uso de: Ascensor 1 Escaleras 2 |\_\_| 00706 Ascensor y escaleras 3

(\*) Anotar en gabinete.

## B. MEDIDAS ANTROPOMÉTRICAS

### Código en caso de ausencia de respuesta:

Por favor complete cada ítem con el número de opción o respuesta apropiados. En caso de ausencia de respuesta utilice el código 99 seguido de alguna de las especificaciones siguientes.

- 1. No puede responder por trastorno cognitivo
- 2. No puede hacerlo por limitaciones físicas
- 3. Se niega
- 4. No es apropiado
- 5. Desconoce la respuesta
- 6. Otro

9. Peso Kg \_\_\_\_\_ 00901

**Por favor, utilice una la báscula calibrada de este estudio. Solicite al participante que se descalce, así como que se quite prendas de abrigo pesadas.**

10. Talla cm \_\_\_\_\_ 01001

**Use el tallímetro. La medida debe tomarse estando el participante descalzo.**

Calcule el Índice de Masa Corporal (IMC= peso/talla<sup>2</sup> en kg/m<sup>2</sup>) \_\_\_\_\_ / \_\_\_\_\_<sup>2</sup> = \_\_\_\_\_

11. Tensión arterial 1 mmHg \_\_\_\_\_ 01101 / \_\_\_\_\_ 01102

**Sólo si no ha sido registrada previamente durante la administración del Cuadernillo A. Por favor asegúrese de que los pacientes no hayan fumado, tomado cafeína o comido en los 30 minutos anteriores a la medida y hayan permanecido en reposo los 5 minutos anteriores a la medida. Los pacientes deberían estar relajados y no hablar. El paciente debe estar cómodamente sentado en una silla con el brazo en el que se vaya a medir la TA apoyado y a la altura del corazón y con los pies apoyados en el suelo. Se recomienda el uso de un tensiómetro de mercurio. Medir la tensión en ambos brazos y elegir el que tenga la presión más alta.**

12. Tensión arterial 2 mmHg \_\_\_\_\_ 01201 / \_\_\_\_\_ 01202

**Tome la segunda lectura transcurridos 2 minutos. Si las lecturas varían 5 mmHg o más, realice medidas adicionales.**

13. Otras medidas:

13.a Circunferencia braquial cm \_\_\_\_\_ 01301

**Pida al participante que sitúe el codo de su brazo no dominante en ángulo recto manteniendo hacia arriba la palma de la mano. Mida la distancia desde la escápula al codo en la parte posterior del brazo; marque el punto medio con un bolígrafo o similar. Pida al paciente que deje el brazo colgar libremente y mida el perímetro del brazo en ese punto. Aproximar al milímetro más cercano**

13.b Circunferencia de la pantorrilla cm \_\_\_\_\_ 01302

**El participante debe estar sentado con las piernas relajadas y sueltas o de pie con el peso distribuido homogéneamente entre ambas piernas. Pida al participante que descubra la zona de la pantorrilla. Tome la primera medida en la zona más ancha de la pantorrilla. Tome otras medidas en zonas inmediatamente adyacentes para comprobar que la primera lectura corresponde al punto de mayor perímetro. La medida se considerará correcta solo si la cinta está perpendicular al eje de la pantorrilla. Aproximar al milímetro más cercano**

13.c Altura talón-rodilla cm \_\_\_\_\_ 01303

**El participante debe estar sentado con las piernas relajadas y la rodilla flexionada en ángulo recto. Mida desde la parte exterior de la rodilla hasta el punto de contacto del talón con el suelo. Aproximar al milímetro más cercano**

**Por favor, anote el tiempo transcurrido de la entrevista hasta este momento** | \_\_\_\_\_ | 01401

## C. DISCAPACIDAD

### Código en caso de ausencia de respuesta:

Por favor complete cada ítem con el número de opción o respuesta apropiados. En caso de ausencia de respuesta utilice el código 99 seguido de alguna de las especificaciones siguientes.

1. No puede responder por trastorno cognitivo
2. No puede hacerlo por limitaciones físicas
3. Se niega
4. No es apropiado
5. Desconoce la respuesta
6. Otro

## I. Cuestionario para la Discapacidad WHO-DAS II (12 ítems)

*Por favor, al leer enfatice el texto subrayado, utilice los ejemplos y explicaciones que aparecen entre paréntesis con objeto de aclarar al entrevistado el significado de las preguntas. La información en cursiva entre paréntesis es para Vd. y no debe leerse al entrevistado. Si el participante adelanta información repita la pregunta en el momento adecuado aunque de forma confirmatoria (p.ej., entonces decía Vd. que ha tenido dificultades para realizar sus quehaceres, etc.). Durante al entrevista mantenga un clima adecuado mediante frases neutras. Si el paciente divaga sobre aspectos irrelevantes a la pregunta sugiera tratar tales aspectos al término de la entrevista. Si es necesario clarifique y vuelva a repetir la pregunta.*

|                                   |                                                                                                                                                                                                             |           | Ninguna | Leve | Moderada | Grave | Extrema/<br>No puedo hacerlo |
|-----------------------------------|-------------------------------------------------------------------------------------------------------------------------------------------------------------------------------------------------------------|-----------|---------|------|----------|-------|------------------------------|
| <b>Muestre las tarjetas 1 y 2</b> |                                                                                                                                                                                                             |           |         |      |          |       |                              |
| 15.                               | ¿Cuánta dificultad ha tenido para <u>estar de pie</u> durante <u>largos</u> periodos de tiempo, como por ejemplo 30 minutos?                                                                                | __  01501 | 1       | 2    | 3        | 4     | 5                            |
| 16.                               | ¿Cuánta dificultad ha tenido para cumplir con sus <u>quehaceres de la casa</u> ?                                                                                                                            | __  01601 | 1       | 2    | 3        | 4     | 5                            |
| 17.                               | ¿Cuánta dificultad ha tenido para aprender una nueva tarea, por ejemplo, llegar a un lugar en donde nunca ha estado?                                                                                        | __  01701 | 1       | 2    | 3        | 4     | 5                            |
| 18.                               | ¿Cuánta dificultad ha tenido para <u>participar</u> , al mismo nivel que el resto de las personas, <u>en actividades de la comunidad</u> (por ejemplo fiestas, actividades religiosas u otras actividades)? | __  01801 | 1       | 2    | 3        | 4     | 5                            |
| 19.                               | ¿Cuánto <u>le ha afectado emocionalmente</u> su estado de salud?                                                                                                                                            | __  01901 | 1       | 2    | 3        | 4     | 5                            |
| 20.                               | ¿Cuánta dificultad ha tenido para <u>concentrarse</u> en hacer algo durante <u>diez minutos</u> ?                                                                                                           | __  02001 | 1       | 2    | 3        | 4     | 5                            |
| 21.                               | ¿Cuánta dificultad ha tenido para <u>caminar largas distancias</u> , como <u>un kilómetro</u> (o algo equivalente)?                                                                                         | __  02101 | 1       | 2    | 3        | 4     | 5                            |
| 22.                               | ¿Cuánta dificultad ha tenido para <u>bañarse/lavarse</u> todo el cuerpo?                                                                                                                                    | __  02201 | 1       | 2    | 3        | 4     | 5                            |
| 23.                               | ¿Cuánta dificultad ha tenido para <u>vestirse</u> ?                                                                                                                                                         | __  02301 | 1       | 2    | 3        | 4     | 5                            |
| 24.                               | ¿Cuánta dificultad ha tenido para <u>relacionarse</u> con personas que <u>no conoce</u> ?                                                                                                                   | __  02401 | 1       | 2    | 3        | 4     | 5                            |
| 25.                               | ¿Cuánta dificultad ha tenido para <u>mantener una amistad</u> ?                                                                                                                                             | __  02501 | 1       | 2    | 3        | 4     | 5                            |
| 26.                               | ¿Cuánta dificultad ha tenido para llevar a cabo su <u>trabajo</u> diario?                                                                                                                                   | __  02601 | 1       | 2    | 3        | 4     | 5                            |

***Si el participante no contesta ninguna pregunta con "1" (ninguna dificultad) pase al punto III, si el participante contesta alguna pregunta con "1" (ninguna dificultad) pase el WHO-DAS de 36 ítems***

## II. Cuestionario para la Discapacidad WHO-DAS II (36 ítems)

***A completar por el entrevistador antes de iniciar la entrevista, marque solo una respuesta***

27. ¿Cómo vive el participante en el momento de la entrevista?

- 1 Vive de forma independiente en la comunidad
- 2 Vive recibiendo apoyo
- 3 Hospitalizado

|\_\_| 02701

***A completar por el entrevistador antes de iniciar la entrevista, marque solo una respuesta***

28. Muestra

- 1 Población general
- 2 Problemas relacionados con las drogas
- 3 Problemas de salud mental
- 4 Problemas físicos

5 Otros Especificar:                                   **ANCIANOS**                                  

| 5 | 02801

## II-1. Datos demográficos y de índole general

### ***En caso de población clínica leer lo siguiente:***

Esta entrevista ha sido desarrollada por la Organización Mundial de la Salud con el fin de llegar a entender mejor las dificultades que puedan tener las personas debido a su estado de salud. La información que nos proporcione durante esta entrevista será confidencial y utilizada exclusivamente con fines de investigación.

### ***En caso de población general leer lo siguiente:***

Aunque usted esté sano/a y no tenga dificultades, me gustaría hacerle todas las preguntas incluidas en esta entrevista, para así obtener una información completa.

## II-2. Preámbulo

### ***Diga al entrevistado:***

El resto de esta entrevista trata sobre las dificultades que las personas tienen debido a su estado de salud.

### ***Entregue la tarjeta 1 al entrevistado***

Por estado de salud me refiero a una enfermedad u otros problemas de salud de corta o larga duración, lesiones, problemas mentales o emocionales (o de los nervios) y problemas relacionados con el uso de alcohol o drogas. Le recuerdo que, cuando conteste a las preguntas, piense en todos sus problemas de salud. Cuando le pida que me hable acerca de las dificultades que tiene a la hora de realizar una actividad, por favor, tome en consideración los siguientes aspectos.

### ***Señale la tarjeta 1***

- Aumento del esfuerzo
- Malestar o dolor
- Lentitud
- Cambios en el modo en que realiza la actividad

### ***Señale la tarjeta 1***

A lo largo de toda esta entrevista, cuando esté respondiendo a cada pregunta me gustaría que pensara en los últimos 30 días. Me gustaría que respondiera estas preguntas pensando en cuanta dificultad tiene usted cuando realiza esta actividad según acostumbra a hacerlo.

### ***Entregue la tarjeta 2 al entrevistado***

Cuando responda a las preguntas, utilice esta escala (*Lea la escala en voz alta*): Ninguno/a, leve, moderado/a, grave, extremo/ o no puede hacerlo.

***Las tarjetas 1 y 2 han de permanecer a la vista del entrevistado durante toda la entrevista. La tarjeta 3 se utiliza en aquellos ítems en los que se le pide que diga el número de días en los que tuvo la dificultad***

**II-3. Comprensión y comunicación**

Ahora le voy a leer algunas preguntas sobre comprensión y comunicación

**Muestre las tarjetas 1 y 2.**

**Si alguno de los ítems se puntúa con "1" (ninguna dificultad pregunte: ¿Cuántos días ha estado presente esta dificultad? y anote el número de días (0-30)**

|                                                            |                                                                                                         | Ninguno/a | Leve | Moderado/a | Grave | Extremo/a No puedo hacerlo |   |            |
|------------------------------------------------------------|---------------------------------------------------------------------------------------------------------|-----------|------|------------|-------|----------------------------|---|------------|
| En los últimos 30 días, ¿cuánta dificultad ha tenido para: |                                                                                                         |           |      |            |       |                            |   |            |
| 29.                                                        | Concentrarse en hacer algo durante diez minutos?                                                        | __  02901 | 1    | 2          | 3     | 4                          | 5 | ____ 02902 |
| 30.                                                        | Recordar las cosas importantes que tiene que hacer? (no importa que para ello requiera ayudas externas) | __  03001 | 1    | 2          | 3     | 4                          | 5 | ____ 03002 |
| 31.                                                        | Analizar y encontrar soluciones a los problemas de la vida diaria?                                      | __  03101 | 1    | 2          | 3     | 4                          | 5 | ____ 03102 |
| 32.                                                        | Aprender una nueva tarea, como por ejemplo llegar a un lugar en donde nunca ha estado?                  | __  03201 | 1    | 2          | 3     | 4                          | 5 | ____ 03202 |
| 33.                                                        | Entender en general lo que dice la gente?                                                               | __  03301 | 1    | 2          | 3     | 4                          | 5 | ____ 03302 |
| 34.                                                        | Iniciar o mantener una conversación? (si ambos aspectos son diversos realice un promedio)               | __  03401 | 1    | 2          | 3     | 4                          | 5 | ____ 03402 |

**Si alguno de los ítems comprendidos entre el 29 y el 34 se puntúa por encima de ninguna (1), pregunte:**

|     |                                                         |           |   |   |   |   |   |
|-----|---------------------------------------------------------|-----------|---|---|---|---|---|
| 35. | ¿Cuánto han interferido estas dificultades con su vida? | __  03501 | 1 | 2 | 3 | 4 | 5 |
|-----|---------------------------------------------------------|-----------|---|---|---|---|---|

**II-4. Capacidad para moverse en su alrededor/entorno**

Ahora voy a preguntarle acerca de dificultades a la hora de moverse en su alrededor/entorno

**Muestre las tarjetas 1 y 2**

**Si alguno de los ítems se puntúa con "1" (ninguna dificultad, pregunte: ¿Cuántos días ha estado presente esta dificultad? y anote el número de días (0-30)**

|                                                            |                                                                                  | Ninguno/a | Leve | Moderado/a | Grave | Extremo/a No puedo hacerlo |   |            |
|------------------------------------------------------------|----------------------------------------------------------------------------------|-----------|------|------------|-------|----------------------------|---|------------|
| En los últimos 30 días, ¿cuánta dificultad ha tenido para: |                                                                                  |           |      |            |       |                            |   |            |
| 36.                                                        | Estar de pie durante largos periodos de tiempo, como por ejemplo 30 minutos?     | __  03601 | 1    | 2          | 3     | 4                          | 5 | ____ 03602 |
| 37.                                                        | Ponerse de pie cuando estaba sentado/a?                                          | __  03701 | 1    | 2          | 3     | 4                          | 5 | ____ 03702 |
| 38.                                                        | Moverse dentro de su casa?                                                       | __  03801 | 1    | 2          | 3     | 4                          | 5 | ____ 03802 |
| 39.                                                        | Salir de su casa? (aunque haya sido a causa de síntomas de ansiedad o depresión) | __  03901 | 1    | 2          | 3     | 4                          | 5 | ____ 03902 |
| 40.                                                        | Caminar largas distancias, como un kilómetro (o equivalente)?                    | __  04001 | 1    | 2          | 3     | 4                          | 5 | ____ 04002 |

**Si alguno de los ítems comprendidos entre el 36 y el 40 se puntúa por encima de ninguna (1), pregunte:**

|     |                                                         |           |   |   |   |   |   |
|-----|---------------------------------------------------------|-----------|---|---|---|---|---|
| 41. | ¿Cuánto han interferido estas dificultades con su vida? | __  04101 | 1 | 2 | 3 | 4 | 5 |
|-----|---------------------------------------------------------|-----------|---|---|---|---|---|

**II-5. Cuidado personal**

Ahora voy a preguntarle acerca de dificultades en su cuidado personal

**Muestre las tarjetas 1 y 2**

**Si alguno de los ítems se puntúa con "1" (ninguna dificultad, pregunte: ¿Cuántos días ha estado presente esta dificultad? y anote el número de días (0-30))**

En los últimos 30 días, ¿cuánta dificultad ha tenido para:

|                                                                                                               | Ninguno/a   | Leve | Moderado/a | Grave | Extremo/a No puedo hacerlo |            |
|---------------------------------------------------------------------------------------------------------------|-------------|------|------------|-------|----------------------------|------------|
| 42. Bañarse (lavarse todo el cuerpo)?                                                                         | __  04201 1 | 2    | 3          | 4     | 5                          | ____ 04202 |
| 43. Vestirse?                                                                                                 | __  04301 1 | 2    | 3          | 4     | 5                          | ____ 04302 |
| 44. Comer?                                                                                                    | __  04401 1 | 2    | 3          | 4     | 5                          | ____ 04402 |
| 45. Estar solo/a durante unos días?                                                                           | __  04501 1 | 2    | 3          | 4     | 5                          | ____ 04502 |
| <b>Si alguno de los ítems comprendidos entre el 42 y el 45 se puntúa por encima de ninguna (1), pregunte:</b> |             |      |            |       |                            |            |
| 46. ¿Cuánto han interferido estas dificultades con su vida?                                                   | __  04601 1 | 2    | 3          | 4     | 5                          |            |

**II-6. Relacionarse con otras personas**

Ahora voy a preguntarle acerca de dificultades para relacionarse con otras personas. Por favor, recuerde que solo le estoy preguntando acerca de dificultades debidas a problemas de salud, tales como enfermedades o lesiones, problemas mentales o emocionales, o problemas relacionados con el uso de alcohol o drogas.

**Muestre las tarjetas 1 y 2**

**Si alguno de los ítems se puntúa "1" (ninguna dificultad, pregunte: ¿Cuántos días ha estado presente esta dificultad? y anote el número de días (0-30))**

En los últimos 30 días, ¿cuánta dificultad ha tenido para:

|                                                                                                                 | Ninguno/a   | Leve | Moderado/a | Grave | Extremo/a No puedo hacerlo |            |
|-----------------------------------------------------------------------------------------------------------------|-------------|------|------------|-------|----------------------------|------------|
| 47. Relacionarse con personas que no conoce?                                                                    | __  04701 1 | 2    | 3          | 4     | 5                          | ____ 04702 |
| 48. Mantener una amistad?                                                                                       | __  04801 1 | 2    | 3          | 4     | 5                          | ____ 04802 |
| 49. Llevarse bien con personas cercanas a usted?                                                                | __  04901 1 | 2    | 3          | 4     | 5                          | ____ 04902 |
| 50. Hacer nuevos amigos?                                                                                        | __  05001 1 | 2    | 3          | 4     | 5                          | ____ 05002 |
| 51. Tener relaciones sexuales? (Se incluyen expresiones de afectividad como caricias, besos, etc.)              | __  05101 1 | 2    | 3          | 4     | 5                          | ____ 05102 |
| <b>Si alguno de los ítems comprendidos entre el 47 y el 51 se puntúa con "1" (ninguna dificultad, pregunte:</b> |             |      |            |       |                            |            |
| 52. ¿Cuánto han interferido estas dificultades con su vida?                                                     | __  05201 1 | 2    | 3          | 4     | 5                          |            |



**II-7. Actividades de la vida diaria**

- Quehaceres de casa

Las siguientes preguntas se refieren a actividades que implican el realizar los quehaceres de la casa y cuidar de las personas que conviven con Vd. o que le son cercanas. Estas actividades incluyen cocinar, limpiar, hacer las compras, llevar las cuentas de la casa, realizar pequeñas reparaciones, pagar las cuentas, sacar la basura, así como el cuidado de otras personas y de sus propias pertenencias.

53. Generalmente, ¿cuántas horas a la semana dedica a estas actividades?

Núm. de horas \_\_\_ / \_\_\_ 05101

**Muestre las tarjetas 1 y 2**

**Si alguno de los ítems se puntúa con "1" (ninguna dificultad, pregunte: ¿Cuántos días ha estado presente esta dificultad? y anote el número de días (0-30)**

|     |                                                                        | Debido a su estado de salud, en los últimos 30 días, ¿cuánta dificultad ha tenido para: |      |            |       |                            |   |           |
|-----|------------------------------------------------------------------------|-----------------------------------------------------------------------------------------|------|------------|-------|----------------------------|---|-----------|
|     |                                                                        | Ninguno/a                                                                               | Leve | Moderado/a | Grave | Extremo/a No puedo hacerlo |   |           |
| 54. | Cumplir con sus <u>quehaceres de la casa</u> ?                         | __  05401                                                                               | 1    | 2          | 3     | 4                          | 5 | ___ 05402 |
| 55. | Realizar <u>bien</u> sus quehaceres de la casa más importantes?        | __  05501                                                                               | 1    | 2          | 3     | 4                          | 5 | ___ 05502 |
| 56. | <u>Acabar</u> todo el trabajo de la casa que tenía que hacer?          | __  05601                                                                               | 1    | 2          | 3     | 4                          | 5 | ___ 05602 |
| 57. | Acabar sus quehaceres de la casa tan <u>rápido</u> como era necesario? | __  05701                                                                               | 1    | 2          | 3     | 4                          | 5 | ___ 05702 |

**Si alguno de los ítems comprendidos entre el 54 y el 57 se puntúa con "1" (ninguna dificultad, pregunte:**

58. ¿Cuánto han interferido estas dificultades con su vida?

|\_\_| 05801 1 2 3 4 5

59. En los últimos 30 días, ¿durante cuántos días disminuyó o dejó de hacer sus quehaceres de la casa debido a su "condición de salud"?

Núm. días \_\_\_ / \_\_\_ 05901

**Si el entrevistado realiza algún tipo de actividad de tipo laboral o que requiera una regularidad o responsabilidad significativas, ya sea remunerada o no (p.ej., voluntariado, ayudar en un negocio familiar, cargo activo en alguna asociación, etc.), realice las preguntas siguientes. En caso contrario vaya a la sección de "Participación en la Sociedad".**

**II-8. Actividad laboral**

Ahora voy a hacerle algunas preguntas relacionadas con su trabajo.

60. Generalmente, ¿cuántas horas a la semana trabaja?

Núm. de horas \_\_\_ / \_\_\_ 06001

**Muestre las tarjetas 1 y 2**

**Si alguno de los ítems se puntúa con "1" (ninguna dificultad: muestre la tarjeta 3, pregunte: ¿Cuántos días ha estado presente esta dificultad? y anote el número de días (0-30)**

|                                                                                                                 |                                                                                                    |                          |       |   |    |   | Ninguno/a | Leve | Moderado/a | Grave | Extremo/a No puedo hacerlo                                  |  |
|-----------------------------------------------------------------------------------------------------------------|----------------------------------------------------------------------------------------------------|--------------------------|-------|---|----|---|-----------|------|------------|-------|-------------------------------------------------------------|--|
| Debido a su estado de salud, en los últimos 30 días, ¿cuánta dificultad ha tenido para:                         |                                                                                                    |                          |       |   |    |   |           |      |            |       |                                                             |  |
| 61.                                                                                                             | Llevar a cabo su <u>trabajo</u> diario?                                                            | <input type="checkbox"/> | 06101 | 1 | 2  | 3 | 4         | 5    |            |       | <input type="checkbox"/> 06102                              |  |
| 62.                                                                                                             | Realizar <u>bien</u> las tareas mas importantes de su trabajo?                                     | <input type="checkbox"/> | 06201 | 1 | 2  | 3 | 4         | 5    |            |       | <input type="checkbox"/> 06202                              |  |
| 63.                                                                                                             | <u>Acabar</u> todo el trabajo que necesitaba hacer?                                                | <input type="checkbox"/> | 06301 | 1 | 2  | 3 | 4         | 5    |            |       | <input type="checkbox"/> 06302                              |  |
| 64.                                                                                                             | Acabar su trabajo tan <u>rápido</u> como era necesario?                                            | <input type="checkbox"/> | 06401 | 1 | 2  | 3 | 4         | 5    |            |       | <input type="checkbox"/> 06402                              |  |
| 65.                                                                                                             | ¿Ha tenido que <u>reducir su nivel</u> de trabajo debido a su estado de salud?                     |                          |       | 1 | Sí | 2 | No        |      |            |       | <input type="checkbox"/> 06501                              |  |
| 66.                                                                                                             | ¿Ha <u>ganado menos dinero</u> debido a su estado de salud?                                        |                          |       | 1 | Sí | 2 | No        |      |            |       | <input type="checkbox"/> 06502                              |  |
| <b>Si alguno de los ítems comprendidos entre el 61 y el 64 se puntúa con "1" (ninguna dificultad, pregunte:</b> |                                                                                                    |                          |       |   |    |   |           |      |            |       |                                                             |  |
| 67.                                                                                                             | ¿Cuánto han <u>interferido</u> estas dificultades con su vida?                                     | <input type="checkbox"/> | 06701 | 1 | 2  | 3 | 4         | 5    |            |       |                                                             |  |
| 68.                                                                                                             | En los últimos 30 días, ¿ha <u>perdido medio día o más de trabajo</u> debido a su estado de salud? |                          |       |   |    |   |           |      |            |       | Núm. días <input type="text"/> / <input type="text"/> 06801 |  |

**II-9. Participación en sociedad**

Ahora voy a hacerle algunas preguntas relacionadas con su participación en la sociedad, y con el impacto que su problema de salud ha tenido sobre usted y su familia. Es posible que algunas de estas preguntas se refieran a problemas que comenzaron hace más de un mes. Sin embargo, es importante que a la hora de contestarlas se refiera exclusivamente a lo ocurrido durante los últimos 30 días. De nuevo le recuerdo que a l contestar a cada una de las siguientes preguntas piense en los problemas de salud mencionados con anterioridad: problemas físicos, problemas mentales o emocionales (o de los nervios), o problemas relacionados con el uso de alcohol o drogas.

**Por favor, consigne solo las limitaciones sufridas por el participante que sean debidas a problemas de salud**

**Muestre las tarjetas 1 y 2**

**Tenga en cuenta que en las preguntas en esta área no se pide que se especifique el número de días**

En los últimos 30 días:

|     |                                                                                                                                                                                                              |                          |       |   |   |   | Ninguno/a | Leve Poco | Moderado/a | Grave | Extremo/a No puedo hacerlo |
|-----|--------------------------------------------------------------------------------------------------------------------------------------------------------------------------------------------------------------|--------------------------|-------|---|---|---|-----------|-----------|------------|-------|----------------------------|
| 69. | ¿Cuánta dificultad ha tenido para <u>participar</u> , al mismo nivel que el resto de las personas, <u>en actividades de la comunidad</u> (por ejemplo, fiestas, actividades religiosas u otras actividades)? | <input type="checkbox"/> | 06901 | 1 | 2 | 3 | 4         | 5         |            |       |                            |
| 70. | ¿Cuánta dificultad ha tenido debido a <u>barreras u obstáculos</u> existentes en su alrededor/entorno?                                                                                                       | <input type="checkbox"/> | 07001 | 1 | 2 | 3 | 4         | 5         |            |       |                            |
| 71. | ¿Cuánta dificultad ha tenido para <u>vivir con dignidad</u> (o respeto) debido a las actitudes y acciones de otras personas?                                                                                 | <input type="checkbox"/> | 07101 | 1 | 2 | 3 | 4         | 5         |            |       |                            |
| 72. | ¿Cuánto le ha <u>afectado emocionalmente</u> su estado de salud?                                                                                                                                             | <input type="checkbox"/> | 07201 | 1 | 2 | 3 | 4         | 5         |            |       |                            |
| 73. | ¿Qué <u>impacto económico</u> ha tenido para usted o para su familia su estado de salud?                                                                                                                     | <input type="checkbox"/> | 07301 | 1 | 2 | 3 | 4         | 5         |            |       |                            |

74. ¿Cuánta dificultad ha tenido su familia debido a su estado de salud? |\_\_| 07401 1 2 3 4 5
75. ¿Cuánta dificultad ha tenido para realizar por si mismo/a cosas que le ayuden a relajarse o disfrutar? |\_\_| 07501 1 2 3 4 5
76. ¿Cuánto tiempo ha dedicado a su estado de salud o a las consecuencias del mismo? |\_\_| 07601 1 2 3 4 5

**Si alguno de los ítems comprendidos entre el 69 el 76 se puntúa con "1" (ninguna dificultad, pregunte:**

77. ¿En qué medida han interferido estas dificultades con su vida? |\_\_| 07701 1 2 3 4 5
78. En los últimos 30 días, ¿durante cuantos días ha tenido esas dificultades? Núm. días \_\_\_\_ / \_\_\_\_ 07801
79. En total en los últimos 30 días, ¿durante cuantos días experimentó alguna de esas dificultades que ha comentado a lo largo de esta entrevista? Núm. días \_\_\_\_ / \_\_\_\_ 07901

Muchas gracias. Ahora me gustaría hacerle algunas preguntas para ver en que se ha basado para contestar de la manera en que lo ha hecho.

80. Cuando contestó a las preguntas relacionadas con las dificultades que ha tenido, ¿se comparó con alguien? |\_\_| 08001 1 2 3 4 5

**Si la respuesta es afirmativa, pregunte el ítem siguiente. Si es negativa vaya al ítem 83 (tiempo de admón.)**

81. ¿Con quién se comparó?
- 1 Consigo mismo(a) cuando era más joven
  - 2 Consigo mismo(a) antes de la "condición de salud"
  - 3 Con sus amigos(as)
  - 4 Con otros(as) de mi misma edad y sexo
  - 5 Otros (especifique) \_\_\_\_\_ 08101 |\_\_| 08102
82. En total en los últimos 30 días, ¿durante cuantos días experimentó alguna de esas dificultades que ha comentado a lo largo de esta entrevista? Núm. días \_\_\_\_ / \_\_\_\_ 08201

**Por favor recapitule en voz alta con el entrevistado las respuestas dadas al WHO-DAS II, compruebe que todas las respuestas han sido cumplimentadas correctamente**

### III. Índice de Katz

**Esta prueba no es de carácter auto-referido, por favor realice cuantas averiguaciones considere oportunas para contestarla fiablemente.**

#### Código en caso de ausencia de respuesta:

Por favor complete cada ítem con el número de opción o respuesta apropiados. En caso de ausencia de respuesta utilice el código 99 seguido de alguna de las especificaciones siguientes.

1. No puede responder por trastorno cognitivo
2. No puede hacerlo por limitaciones físicas
3. Se niega
4. No es apropiado
5. Desconoce la respuesta
6. Otro

**La "independencia" conlleva la ausencia de supervisión, dirección o ayuda activa de otra persona. La independencia se basa en el estado actual y no en la habilidad potencial. Una persona que se niega a realizar una función, se considera que no la hace aunque sea capaz de hacerla.**

- 84. Baño (ducha o bañera)** |\_\_| 08401
- 1 Independiente: No precisa asistencia (sale y entra por sí mismo del baño o ducha)  
 2 Dependiente parcial: Necesita ayuda sólo para lavarse una parte del cuerpo (espalda o una extremidad)  
 3 Dependiente: Necesita ayuda para lavarse más de una parte del cuerpo, para entrar y salir de la bañera o no se lava sólo
- 85. Vestido** |\_\_| 08501
- 1 Independiente: Coge la ropa de los cajones y armarios se la pone y puede abrocharse  
 2 Dependiente parcial: Igual al anterior, pero necesita ayuda para atarse los zapatos  
 3 Dependiente: No se viste por sí mismo o permanece parcialmente desvestido
- 86. Uso del retrete** |\_\_| 08601
- 1 Independiente: No precisa ningún tipo de ayuda para entrar o salir del cuarto de baño. Usa el retrete, se limpia y se viste adecuadamente. Puede usar un orinal por la noche  
 2 Dependiente parcial: Necesita ayuda para alguno de los aspectos anteriores  
 3 Dependiente: Usa orinal o cuña, o precisa ayuda para acceder y utilizar el retrete
- 87. Movilización (cama-sillón)** |\_\_| 08701
- 1 Independiente: No requiere ayuda para sentarse o levantarse de una silla ni para entrar o salir de la cama (puede utilizar ayudas mecánicas como un bastón)  
 2 Dependiente parcial: Precisa ayuda para alguno de los aspectos anteriores  
 3 Dependiente: En cama
- 88. Continencia (micción, defecación)** |\_\_| 08801
- 1 Independiente: Control completo de la micción y de la defecación  
 2 Dependiente parcial: Tiene accidentes ocasionalmente  
 3 Dependiente: Incontinencia total o parcial de la micción y/o defecación. Incluye el control total de dichas funciones mediante enemas, sonda o el empleo reglado de orinal y/o cuña
- 89. Alimentación** |\_\_| 08901
- 1 Independiente: Lleva la comida del plato a la boca sin ayuda  
 2 Dependiente parcial: No precisa ayuda para lo anterior pero sí para cortar la carne  
 3 Dependiente: Necesita ayuda para comer; no come en absoluto o requiere nutrición enteral-parenteral
- 90. Hacer la compra (ir a la tienda, subir escaleras, superar barreras físicas, seleccionar, pagar y transportar los artículos al domicilio)** |\_\_| 09001
- 1 Independiente: Realiza la actividad al menos semanalmente  
 2 Dependiente parcial: La realiza acompañado por otra persona  
 3 Dependiente: No la realiza o necesita asistencia para alguno de los aspectos
- 91. Limpiar la casa (quitar el polvo, aspirar o fregar suelos, sacudir las alfombras/felpudo)** |\_\_| 09101
- 1 Independiente: Realiza la actividad al menos quincenalmente  
 2 Dependiente parcial: Necesita ayuda para limpiar alfombras/felpudo  
 3 Dependiente: No realiza la actividad o necesita alguna ayuda
- 92. Transporte (utiliza transportes públicos; autobús, metro o tren)** |\_\_| 09201
- 1 Independiente: Utiliza el transporte público  
 2 Dependiente parcial: Necesita compañía de otra persona  
 3 Dependiente: No utiliza el transporte público

93. Lavar la ropa (lleva la ropa a la lavadora, añade detergente, la saca, la tiende) |\_\_| 09301
- 1 Independiente: Realiza la actividad al menos una vez al mes  
 2 Dependiente parcial: Necesita ayuda para tender  
 3 Dependiente: No la realiza o necesita alguna ayuda, excepto para tender
94. Cocinar (va a la cocina, prepara la cena, maneja los fuegos) |\_\_| 09401
- 1 Independiente: Realiza la actividad al menos tres veces por semana  
 2 Dependiente parcial: Necesita ayuda en algún aspecto de la actividad  
 3 Dependiente: No realiza la actividad

## D. CALIDAD DE VIDA (EuroQoL)

### Código en caso de ausencia de respuesta:

*Por favor complete cada ítem con el número de opción o respuesta apropiados. En caso de ausencia de respuesta utilice el código 99 seguido de alguna de las especificaciones siguientes.*

1. No puede responder por trastorno cognitivo
2. No puede hacerlo por limitaciones físicas
3. Se niega
4. No es apropiado
5. Desconoce la respuesta
6. Otro

Ahora en lugar de preguntarle por aspectos de su salud relacionados con los últimos 30 días voy a preguntarle sobre su estado de salud en el día de HOY. Indique la respuesta de cada pregunta que mejor describa su estado de salud, sólo es válida una respuesta en cada pregunta.

***Lea el enunciado de cada pregunta seguido de las opciones. Repita cuantas veces considere oportunas hasta que el entrevistado seleccione alguna de las respuestas posibles. No reformule verbalmente las respuestas***

96. Movilidad |\_\_| 09601
- 1 No tengo problemas para caminar  
 2 Tengo algunos problemas para caminar  
 3 Tengo que estar en la cama
97. Cuidado personal |\_\_| 09701
- 1 No tengo problemas con el cuidado personal  
 2 Tengo algunos problemas para lavarme o vestirme  
 3 Soy incapaz de lavarme o vestirme
98. Actividades cotidianas (p.ej., trabajar, estudiar, hacer las tareas domésticas, actividades familiares o actividades durante el tiempo libre) |\_\_| 09801
- 1 No tengo problemas para realizar mis actividades cotidianas  
 2 Tengo algunos problemas para realizar mis actividades cotidianas  
 3 Soy incapaz de realizar mis actividades cotidianas
99. Dolor/malestar |\_\_| 09901
- 1 No tengo dolor ni malestar  
 2 Tengo dolor moderado o malestar  
 3 Tengo mucho dolor o malestar

100. Ansiedad/depresión |\_\_| 10001

- 1 No estoy ansioso ni deprimido
- 2 Estoy moderadamente ansioso o deprimido
- 3 Estoy muy ansioso o deprimido

101. Comparando con mi estado general de salud durante los últimos 12 meses,  
mi estado de salud hoy es: |\_\_| 10101

- 1 Mejor
- 2 Igual
- 3 Peor

Para ayudar a la gente a describir mejor lo bueno o malo que es su estado de salud hemos dibujado una escala parecida a un termómetro en la cual se marca con un 100 el mejor estado de salud que pueda imaginarse y con un 0 el peor estado de salud que pueda imaginarse.

**Mostrar al participante la tarjeta 4**

102. Nos gustaría que nos indicara en esta escala, en su opinión lo bueno o malo que es su estado de salud, en el día de HOY. Por favor, dibuje una línea desde el casillero donde dice "Su estado de salud hoy" (\*) hasta el punto del termómetro que en su opinión indique lo bueno o malo que es su estado de salud en el día de HOY.

|\_\_| 10201

**Mostrar al entrevistado ilustración adjunta**

**(\*) A veces se tiende a valorar el estado de salud actual haciendo una cruz o una marca en la EVA**

## E. EVALUACIÓN DEL ESTADO NUTRICIONAL (MNA)

**Código en caso de ausencia de respuesta:**

Por favor complete cada ítem con el número de opción o respuesta apropiados. En caso de ausencia de respuesta utilice el código 99 seguido de alguna de las especificaciones siguientes.

1. No puede responder por trastorno cognitivo
2. No puede hacerlo por limitaciones físicas
3. Se niega
4. No es apropiado
5. Desconoce la respuesta
6. Otro

Ahora voy a hacerle algunas preguntas sobre los alimentos que toma y sobre otros aspectos relacionados con la salud y la alimentación.

**Responda a la primera parte del cuestionario indicando la puntuación adecuada para cada pregunta. Sume los puntos correspondientes al cribaje y si la suma es igual o inferior a 11, complete el cuestionario para obtener una apreciación precisa del estado nutricional. Las preguntas que deben ser contestadas por el participante están indicadas por el encabezado "Preguntar al participante". En cada pregunta se especifica la fuente de información que debe consultarse para su contestación (participante, historial clínico, cuidador, juicio profesional).**

## I. Cribaje del estado nutricional

104. ¿Ha perdido el apetito? ¿Ha comido menos por falta de apetito, problemas digestivos, dificultades al masticar, o al tragar en los últimos tres meses? |\_\_| 10401

### Pregunte al participante

¿Ha comido menos de lo normal durante los últimos tres meses?

En caso afirmativo: ¿Ha comido menos por falta de apetito o por problemas al masticar o tragar?

En caso afirmativo: ¿Esta comiendo Vd. mucho menos de lo que comía o solo un poco menos?

- 1 Pérdida de apetito grave (0)
- 2 Pérdida de apetito moderada (1)
- 3 No hay pérdida de apetito (2)

105. Pérdida de peso (<3 meses) |\_\_| 10501

### Pregunte al participante/historial clínico si es un paciente crónico o vive en una residencia

¿Ha perdido Vd. peso en los últimos tres meses?

¿Ha notado que la ropa le queda mas suelta en la cintura?

¿Cuánto peso cree Vd. que ha perdido?

Facilitar la respuesta diciendo: ¿Más o menos de 3 kilos?

- 1 Pérdida de peso >3kg (0)
- 2 No lo sabe (1)
- 3 Pérdida de peso entre 1 y 3 Kg. (2)
- 4 No ha habido pérdida de peso (3)

+

106. Movilidad |\_\_| 10601

### Historial clínico/informe del cuidador/informe del participante si es necesario

¿Es Vd. capaz de levantarse del sillón/cama?

¿Es Vd. capaz de salir de casa?

- 1 De la cama al sillón (0)
- 2 Autonomía interior (1)
- 3 Sale del domicilio (2)

+

107. ¿Ha tenido alguna enfermedad aguda o situación de estrés psicológico en los últimos tres meses? |\_\_| 10701

### Historial clínico/juicio profesional/pregunte al participante

¿Ha fallecido algún ser querido hace poco?

¿Se ha mudado hace poco?

¿Se ha encontrado Vd. mal últimamente?

### Si el historial clínico del paciente especifica alguna enfermedad aguda puntúe "0"

- 1 Sí (0)
- 2 No (1)

+

108. Problemas neuropsicológicos |\_\_| 10801

### Historial clínico/juicio profesional/Informe del cuidador

**Si el participante se encuentra presenta demencia o confusión mental importante, la precisión de las preguntas 74, 75, 76, 77, 80, 83, 84, 85, 86, 88 y 89 debe ser contrastada con el cuidador o con el personal sanitario según proceda**

- 1 Demencia o depresión grave (0)
- 2 Demencia o depresión moderada (1)
- 3 Sin problemas psicológicos (2)

+

109. Índice de Masa Corporal (IMC. = peso/ talla<sup>2</sup> en Kg. /m<sup>2</sup>)

|\_\_| 10901

**Tomar de los ítems 9 y 10**

- 1 IMC < 19 (0)
- 2 19 ≤ IMC < 21 (1)
- 3 21 ≤ IMC < 23 (2)
- 4 IMC ≥ 23 (3)

+

=

**Si el participante obtiene 11 puntos o menos continuar la evaluación**

## II. Evaluación del estado nutricional

110. Vida independiente (no vive en un hospital o residencia)

|\_\_| 11001

**Preguntar al participante**

¿Vive Vd. en su casa o en una residencia?

- 1 No (0)
- 2 Sí (1)

**Esta pregunta hace referencia a las condiciones de vida habituales del individuo (p.ej., no considerar como el hecho de que el paciente esté hospitalizado a consecuencia de un accidente o enfermedad aguda)**

111. ¿Toma más de 3 medicamentos al día?

|\_\_| 11101

**Historial clínico**

- 1 No (0)
- 2 Sí (1)

**Compruébelas respuestas obtenidos en el cuestionario médico, las recetas del paciente, pregunte al personal de enfermería o al médico de referencia cuando proceda para comprobar cuantos fármacos toma el participante al día en la actualidad**

112. Úlceras o lesiones cutáneas

|\_\_| 11201

**Pregunte al participante/Historial clínico**

¿Tiene heridas en la piel por estar mucho tiempo en la cama sin moverse?

- 1 No (0)
- 2 Sí (1)

**Compruebe el historial clínico del paciente si está disponible, o pregunte al personal sanitario si procede para certificar la presencia de úlceras u otras lesiones cutáneas.**



113. ¿Cuántas comidas completas toma el paciente al día (equivalentes a dos platos completos y postre)?  11301

**Pregunte al participante**

¿Toma Vd. normalmente desayuno, comida y cena?

- 1 comida (0)
- 2 comidas (1)
- 3 comidas (2)

**Se considera que una comida completa requiere sentarse y comer dos o más platos o raciones de comida**

114. Consumo de proteínas  11401

**Pregunte al participante/pregunte al personal sanitario**

¿Consume leche, queso o yogur todos los días?

¿Come huevos y legumbres (lentejas, garbanzos, alubias, habichuelas, etc.)? ¿con qué frecuencia?

¿Come carne, pescado o pollo cada día?

114.a productos lácteos al menos una vez al día?  11402

- 1 Sí
- 2 No

114.b huevos o legumbres una o dos veces a la semana?  11403

- 1 Sí
- 2 No

114.c carne, pescado o aves diariamente?  11801

- 1 Sí
- 2 No

**(0,0 = 0 a 1 síes; 0,5 = 2 síes; 1,0 = 3 síes)**

115. ¿Consume frutas o verduras al menos dos veces al día?  11501

- 1 No (0)
- 2 Sí (1)

**Pregunte al participante**

¿Come Vd. frutas y verduras?

¿Cuántas raciones de frutas y verduras toma Vd. cada día?

**Una ración debe clasificarse como: una fruta (manzana, plátano, naranja, etc.), un vaso de zumo de fruta, un plato de verduras (no se incluyen patatas)**

116. ¿Cuántos vasos de agua u otros líquidos toma al día? (agua, zumo, café, té, leche, cerveza, vino, etc.)  11601

- 1 Menos de 3 vasos (0,0)
- 2 De 3 a 5 vasos (0,5)
- 3 Más de 5 vasos (1,0)

**Pregunte al participante**

¿Cuántas tazas de café o té bebe Vd. normalmente al día?

¿Bebe Vd. agua, leche o zumo?

¿Bebe Vd. normalmente en un vaso o en una jarra?

**Consideramos que el volumen de un vaso de 190 ml y el de una jarra de 260 ml**

117. Forma de alimentarse |\_\_| 11701

- 1 Necesita ayuda (0)
- 2 Se alimenta solo con dificultad (1)
- 3 Se alimenta solo sin dificultad (2)

**Pregunte al participante/historial clínico/pregunte al cuidador**

¿Es Vd. capaz de comer solo?/¿Puede el paciente comer solo?  
¿Necesita ayuda para alimentarse?/¿Ayuda Vd. al paciente a alimentarse?

118. Estado nutricional auto-referido |\_\_| 11801

- 1 Malnutrición grave (0)
- 2 No lo sabe o malnutrición moderada (1)
- 3 Sin problemas de nutrición (2)

**Pregunte al participante**

¿Cree Vd. que está bien alimentado? (si no lo comprende: ¿come Vd. bien? ¿toma comidas variadas?)

Facilite la respuesta: ¿esta mal alimentado?/¿come mal?  
¿no está seguro?  
¿no tiene problemas con la comida?

**La respuesta a esta pregunta depende de la opinión del paciente. Si considera que el paciente no es capaz de contestar, recurra a la opinión del cuidador o del personal sanitario**

119. En comparación con las personas de su edad, ¿cómo encuentra el paciente su estado de salud? |\_\_| 11901

- 1 Peor (0,0)
- 2 No lo sabe (0,5)
- 3 Igual (1,0)
- 4 Mejor (2,0)

**Pregunte al participante**

¿Se encuentra Vd. bien?  
Facilite la respuesta: ¿no se encuentra tan bien como otras personas de su edad?  
¿no está seguro?  
¿se encuentra tan bien como otras personas de su edad?  
¿se encuentra mejor que otras personas de su edad?

**Nuevamente la respuesta depende de la opinión del participante**

120. Circunferencia braquial |\_\_| 12001

**Tomar del ítem 13.a**

- 1  $CB < 21$  (0,0)
- 2  $21 \leq CB < 22$  (0,5)
- 3  $CB \geq 22$  (1,0)

121. Circunferencia de la pantorrilla (CP en cm) |\_\_| 12101

**Tomar del ítem 13.b**

- 1  $CP < 31$
- 2  $CP \geq 31$

**Por favor, anote el tiempo transcurrido de la entrevista hasta este momento** |\_\_\_\_\_| 12201

## F. FACTORES SOCIALES

### Código en caso de ausencia de respuesta:

Por favor complete cada ítem con el número de opción o respuesta apropiados. En caso de ausencia de respuesta utilice el código 99 seguido de alguna de las especificaciones siguientes.

1. No puede responder por trastorno cognitivo
2. No puede hacerlo por limitaciones físicas
3. Se niega
4. No es apropiado
5. Desconoce la respuesta
6. Otro

## I. Hogar y relación de parentesco

123. Dígame cuál es el número de personas que viven en su hogar (incluyéndose Vd.):

- 1 Vive solo/a  
 2 Vive en compañía |\_\_| 12301

Nº de miembros incluyendo el entrevistado: |\_\_| 12302

124. Ahora vamos a hablar de cada uno de los miembros de su hogar, sin incluirle a Vd. Dígame la edad, el sexo y la relación de convivencia que tienen con Vd. cada uno de los miembros que viven en este hogar, incluido el servicio doméstico si pernocta en el mismo domicilio que Vd.

**Leer las relaciones de convivencia y parentesco.**

**Preguntar: " el siguiente"... " el siguiente", etc., hasta completar.**

|               |                 |                  |                                    |       |
|---------------|-----------------|------------------|------------------------------------|-------|
| Miembro nº 1  | Edad  __  12401 | Sexo*  __  12402 | Relación con el participante**  __ | 12403 |
| Miembro nº 2  | Edad  __  12404 | Sexo  __  12404  | Relación con el participante  __   | 12406 |
| Miembro nº 3  | Edad  __  12407 | Sexo  __  12406  | Relación con el participante  __   | 12409 |
| Miembro nº 4  | Edad  __  12410 | Sexo  __  12408  | Relación con el participante  __   | 12412 |
| Miembro nº 5  | Edad  __  12413 | Sexo  __  12410  | Relación con el participante  __   | 12415 |
| Miembro nº 6  | Edad  __  12416 | Sexo  __  12412  | Relación con el participante  __   | 12418 |
| Miembro nº 7  | Edad  __  12419 | Sexo  __  12414  | Relación con el participante  __   | 12421 |
| Miembro nº 8  | Edad  __  12422 | Sexo  __  12416  | Relación con el participante  __   | 12424 |
| Miembro nº 9  | Edad  __  12425 | Sexo  __  12418  | Relación con el participante  __   | 12427 |
| Miembro nº 10 | Edad  __  12428 | Sexo  __  12420  | Relación con el participante  __   | 12430 |

(\*) 1. Hombre; 2. Mujer

(\*\*) 1. Espos/a o Pareja; 2. Padre/Madre; 3. Suegro/Suegra; 4. Hijo/Hija; 5. Nuera/Yerno; 6. Nieto/a; 7. Hermano/a; 8. Cuñado/a; 9. Otro Familiar; 10. Empleado/a de Hogar o persona de servicio; 11. Otras Personas

## II. Entorno físico: Vivienda

125. ¿Cómo vive el participante en el momento de la entrevista?

**A completar por el entrevistador antes de iniciar la entrevista , marque solo una**

- 1 Vive de forma independiente en la comunidad  
 2 Vive recibiendo apoyo  
 3 Hospitalizado |\_\_| 12501

126. A continuación voy a citarle una serie de dotaciones que puede tener o no su vivienda y el edificio o finca donde se ubica.

|                                                                                                                             | SÍ | No | NC |           |
|-----------------------------------------------------------------------------------------------------------------------------|----|----|----|-----------|
| Agua corriente                                                                                                              | 1  | 2  | 3  | __  12601 |
| Agua caliente                                                                                                               | 1  | 2  | 3  | __  12602 |
| Portería, conserjería                                                                                                       | 1  | 2  | 3  | __  12603 |
| WC o retrete                                                                                                                | 1  | 2  | 3  | __  12604 |
| Ducha o bañera                                                                                                              | 1  | 2  | 3  | __  12605 |
| Instalación de calefacción: central, individual por gas (natural, ciudad), individual eléctrica                             | 1  | 2  | 3  | __  12606 |
| Otros sistemas para elevar la temperatura: estufa butano, estufa eléctrica, brasero, radiadores eléctricos, chimenea, otros | 1  | 2  | 3  | __  12607 |
| Lavadora                                                                                                                    | 1  | 2  | 3  | __  12608 |
| Frigorífico                                                                                                                 | 1  | 2  | 3  | __  12609 |
| TV                                                                                                                          | 1  | 2  | 3  | __  12610 |
| Teléfono fijo o móvil                                                                                                       | 1  | 2  | 3  | __  12611 |
| Automóvil                                                                                                                   | 1  | 2  | 3  | __  12612 |

127. De los siguientes equipamientos que le voy a leer, ¿con qué facilidad puede acceder a ellos? muy fácil, fácil, ni fácil ni difícil, difícil o muy difícil

**Leer y rellenar todos los lugares**

| Lugar                                      | Muy fácil | Fácil | Ni fácil ni difícil | Difícil | Muy difícil | NC | 19606     |
|--------------------------------------------|-----------|-------|---------------------|---------|-------------|----|-----------|
| Centro de salud, médico de cabecera        | 1         | 2     | 3                   | 4       | 5           | 99 | __  12701 |
| Transporte público                         | 1         | 2     | 3                   | 4       | 5           | 99 | __  12702 |
| Jardines, parques, zonas verdes            | 1         | 2     | 3                   | 4       | 5           | 99 | __  12703 |
| Tiendas (panadería, ultramarinos, ...)     | 1         | 2     | 3                   | 4       | 5           | 99 | __  12704 |
| Centros y clubes sociales, culturales, ... | 1         | 2     | 3                   | 4       | 5           | 99 | __  12705 |
| Parroquia u otros servicios religiosos     | 1         | 2     | 3                   | 4       | 5           | 99 | __  12706 |

### III. Entorno social: Red, apoyo y participación

#### III-1. Red familiar y social

128. A lo largo de la semana, ¿con qué frecuencia ve a algún familiar?: diariamente, semanalmente, cada quince días, cada mes o menos.

128.a ¿Y con otros familiares?

128.b ¿Y a algún amigo/amiga?

|                                         | 128 Hijos | 128.a Otros Familiares | 128.b Amigos/as |
|-----------------------------------------|-----------|------------------------|-----------------|
| Nunca                                   | 1         | 1                      | 1               |
| Todos los días                          | 2         | 2                      | 2               |
| Cada semana                             | 3         | 3                      | 3               |
| Cada dos semanas                        | 4         | 4                      | 4               |
| Cada mes                                | 5         | 5                      | 5               |
| (No leer) No tiene amigos ni familiares | 6         | 6                      | 6               |
|                                         | __  12801 | __  12802              | __  12803       |

**129.** A lo largo de la semana, ¿con qué frecuencia habla por teléfono con sus hijos?: todos los días, todas las semanas, cada quince días, cada mes o menos.

**129.a** ¿Y con otros familiares?

**129.b** ¿Y con algún amigo/amiga?

|                                         | <b>129.</b> Hijos | <b>129.a</b> Otros Familiares | <b>129.b</b> Amigos/as |
|-----------------------------------------|-------------------|-------------------------------|------------------------|
| Nunca                                   | 1                 | 1                             | 1                      |
| Todos los días                          | 2                 | 2                             | 2                      |
| Cada semana                             | 3                 | 3                             | 3                      |
| Cada dos semanas                        | 4                 | 4                             | 4                      |
| Cada mes                                | 5                 | 5                             | 5                      |
| (No leer) No tiene amigos ni familiares | 6                 | 6                             | 6                      |
|                                         | __  12901         | __  12902                     | __  12903              |

### III-2. Apoyo Social

**130.** Durante los últimos tres meses, ¿con qué frecuencia ha recibido Vd. ayuda de alguna persona ajena a su hogar sin pagar (amigos, vecinos, hijos/hijas u otros familiares que no viven con Vd.) para labores de la casa (*p.ej., en actividades como hacer la compra, preparar comidas, hacer limpieza, planchar, confeccionar o reparar prendas, reformar vivienda, ir al banco, hacer gestiones, acompañar al médico, otros cuidados personales*)?

- 1 Sí, todos o casi todos los días
- 2 Sí, algunas veces a la semana
- 3 Sí, ocasionalmente
- 4 No ha recibido ayuda aunque la ha necesitado
- 5 No ha recibido ayuda pero no la ha necesitado (No leer) |\_\_| 13001

**131.** ¿Y quién ha sido la persona que en mayor medida le ha ayudado?

- 1 Esposo/a, pareja
- 2 Hija, Hijo
- 3 Nuera, Yerno
- 4 Nieto, Nieta
- 5 Otros familiares
- 6 Vecinos/as, portero/a
- 7 Amigos/as
- 8 Empleado/a de hogar
- 9 Empresa de Servicios Sociales Privada
- 10 Servicios sociales (trabajador/auxiliar)
- 11 Voluntario/a (Parroquia, Cruz Roja, otros)
- 12 Otra persona |\_\_| 13101

**132.** ¿Tiene usted alguna persona especial con quien pueda compartir confidencias y sentimientos, alguien en que usted sienta que puede confiar?

- 1 Sí
- 2 No |\_\_| 13201

### III-3. Participación Social

**133.** Ahora voy a leerle una serie de actividades. Me gustaría que me dijese si las realiza y con qué frecuencia. ¿Acude usted a centros culturales/sociales de la comunidad o del ayuntamiento?

- 1 Sí
- 2 No **En caso negativo pasar a 102.b** |\_\_| 13301

**133.a** ¿Con qué frecuencia?

- 1 Nunca
- 2 Todos los días
- 3 Todas las semanas
- 4 Cada dos semanas
- 5 Cada mes |\_\_| 13302

**133.b** ¿Acude usted a algún tipo de servicio religioso?

- 1 Sí  
2 No **En caso negativo pasar a 133.d**  13304

**133.c** ¿Con qué frecuencia?

- 1 Nunca  
2 Todos los días  
3 Todas las semanas  
4 Cada dos semanas  
5 Cada mes  13305

**133.d** ¿Participa activamente en alguna asociación o club, del tipo de voluntariado, grupo de apoyo social?

- 1 Sí  
2 No **En caso negativo pasar a 134**  13306

**133. e** ¿Con qué frecuencia?

- 1 Nunca  
2 Todos los días  
3 Todas las semanas  
4 Cada dos semanas  
5 Cada mes  13307

**134.** ¿Con qué frecuencia sale usted de casa?

- 1 Nunca  
2 Todos los días  
3 Todas las semanas  
4 Cada dos semanas  
5 Cada mes  13401

#### IV. Estudios, relación con la actividad y ocupación

135. ¿Cuántos años en total estudió en la escuela, instituto, universidad, etc.? años \_\_\_\_\_ 13501

136. ¿Podría decirme cuál es el nivel de estudios más alto terminado por Vd. mismo/a?  
¿Y el de la persona con mayor aportación económica a la familia?

| 135. Entrevistado/a | 136 PMAE* | Nivel de estudios                                                                                                                                                                                                                                                      |
|---------------------|-----------|------------------------------------------------------------------------------------------------------------------------------------------------------------------------------------------------------------------------------------------------------------------------|
| 1                   | 1         | <b>No sabe leer ni escribir:</b> Analfabeto ( <i>No leer</i> )                                                                                                                                                                                                         |
| 2                   | 2         | <b>Sin estudios o inferiores a primarios:</b><br>Personas que saben leer y escribir pero fueron menos de 5 años a la escuela                                                                                                                                           |
| 3                   | 3         | <b>Educación Primaria Completa</b> (hasta los 11 ó 12 años):<br>Personas que han completado 5 cursos escolares del Plan Antiguo (incluido ingreso), o 1ª etapa de EGB (1º a 5º)                                                                                        |
| 4                   | 4         | <b>Educación Secundaria de Primer Grado (de 12 a 16 años de edad):</b><br>Bachillerato Elemental, Graduado Escolar, Certificado de Escolaridad; 2ª etapa de EGB (6º a 8º); 1º y 2º de BUP; ESO; FPI                                                                    |
| 5                   | 5         | <b>Educación Secundaria de Segundo Grado (de 16 a 18 años de edad):</b><br>Bachillerato Superior, 3º de BUP, COU                                                                                                                                                       |
| 6                   | 6         | <b>Formación Profesional (a partir de los 16 años):</b><br>Oficialías, Maestrías, FPII, FPIII                                                                                                                                                                          |
| 7                   | 7         | <b>Enseñanza Universitaria: Primer Ciclo:</b><br>Profesorado Mercantil, Escuelas Técnicas de Grado Medio, asistentes sociales, ATS, Magisterio, Escuelas Universitarias;<br>Título de Escuelas Técnicas Superiores, Título de Diplomatura, Título de Ingeniero Técnico |
| 8                   | 8         | <b>Enseñanza Universitaria: Segundo y Tercer Ciclo:</b><br>Título de Licenciatura, Ingeniería, Doctorado                                                                                                                                                               |

\_\_\_\_\_| 13601 |\_\_\_\_\_| 13601

(\*) Persona de mayor aportación económica a la familia del participante, si esta expresión resulta difícil de comprender al entrevistado utilizar: "persona que pone más dinero en la casa".

137. ¿En cuál de las siguientes situaciones que le voy a mencionar se encuentra ahora Vd.?

137.a ¿Y la persona con mayor aportación económica a la familia?

| 137 Entrevistado/a | 137.a PMAE | Relación con la actividad                             |
|--------------------|------------|-------------------------------------------------------|
| 1                  | 1          | Está trabajando                                       |
| 2                  | 2          | Está parado habiendo trabajado antes                  |
| 3                  | 3          | Esta jubilado                                         |
| 4                  | 4          | Es pensionista                                        |
| 5                  | 5          | Es ama de casa / labores de hogar                     |
| 6                  | 6          | Otra situación (especificar: _____ 13703 _____ 13704) |

\_\_\_\_\_| 13701 |\_\_\_\_\_| 13702

**Si el participante ha trabajado antes preguntar:**

**137.b** ¿Cuál es la ocupación o profesión que desempeña en la actualidad o desempeñaba (en el caso de que hayan trabajado antes)? y ¿la de la persona con mayor aportación económica a la familia?

Actividad del entrevistado: \_\_\_\_\_ 13704

Actividad del PMAE: \_\_\_\_\_ 13705

**138.** De entre las siguientes situaciones que voy a mencionar, ¿podría decirme cuál es la suya?

**138.a** ¿Y la de la persona con mayor aportación económica en la familia?

**En caso de estar jubilado/a o parado/a habiendo trabajado antes, refiérase a su última situación, salvo quien NO HA TRABAJADO NUNCA: pensionista, o parado, o estudiante, o ama de casa que no ha trabajado nunca o que lleva 20 años sin trabajar).**

| Condición Socioeconómica                                          | 138.<br>Entrevistado/a | 138.a<br>PMAE |
|-------------------------------------------------------------------|------------------------|---------------|
| <b>Trabajadores por cuenta propia</b>                             |                        |               |
| Agricultor (pequeña explotación)                                  | 1                      | 1             |
| Agricultor (gran explotación)                                     | 2                      | 2             |
| Autónomo o empresario con 5 empleados o menos                     | 3                      | 3             |
| Autónomo o empresario con 6 a 9 empleados                         | 4                      | 4             |
| Autónomo o empresario con 10 o más empleados                      | 5                      | 5             |
| Autónomo o empresario sin asalariados                             | 6                      | 6             |
| <b>Trabajadores por cuenta ajena</b>                              |                        |               |
| Dirección / Gerencia con 5 subordinados o menos                   | 7                      | 7             |
| Dirección / Gerencia con 6 a 9 subordinados                       | 8                      | 8             |
| Dirección / Gerencia con 10 o más subordinados                    | 9                      | 9             |
| Capataz, supervisor, encargado                                    | 10                     | 10            |
| Mandos intermedios                                                | 11                     | 11            |
| Otros empleados con trabajo fuera de oficina y obrero cualificado | 12                     | 12            |
| Otros empleados con trabajo de oficina                            | 13                     | 13            |
| Trabajador manual no cualificado                                  | 14                     | 14            |
| <b>Actividad laboral no reglada</b>                               |                        |               |
| Voluntariado o participación en asociaciones o parroquias         | 15                     | 15            |
| Ayuda en negocio familiar                                         | 16                     | 16            |
| Otra                                                              | 17                     | 17            |
|                                                                   | __  13801              | __  13802     |

**V. Situación económica**

**139.** ¿Qué persona pone más dinero en la casa?

- 1 Vd. mismo
- 2 Esposo/a, pareja
- 3 Hijo/a
- 4 Nuera, Yerno
- 5 Nieto/a
- 6 Hermano/a
- 7 Cuñado/a
- 8 Otro Familiar
- 9 Otra Persona

|\_\_| 13901



**140.** ¿Podría decirnos cuanto dinero entra en la casa aproximadamente dentro de las siguientes cantidades?

**Leer todas las respuestas**

**140. a** ¿Y los de la persona con mayor aportación económica en la familia?

| 140. Entrevistado/a | 140.a PMAE | Nivel de ingresos                         |
|---------------------|------------|-------------------------------------------|
| 1                   | 1          | Menos de 300€ (Menos de 50.000 Pts)       |
| 2                   | 2          | De 301 a 600€ (De 50.001 a 100.000 Pts)   |
| 3                   | 3          | De 601 a 900€ (de 100.001 a 150.000 Pts)  |
| 4                   | 4          | De 901 a 1200€ (de 150.001 a 200.000 Pts) |
| 5                   | 5          | Más de 1.200 € (Más de 200.000 Pts)       |
| 99                  | 99         | (No leer) No tiene ingresos               |

|\_\_| 14001 |\_\_| 14002

**141.** Teniendo en cuenta todos los bienes del hogar (incluyendo vivienda, ahorros, coche, segunda residencia, etc.), ¿dónde situaría económicamente su hogar, no a Vd. personalmente, sino su hogar en una escala de 1 a 10, en donde el 1 sería un hogar muy pobre y el 10 sería un hogar muy rico?

- 1 Baja
- 2 Baja
- 3 Media Baja
- 4 Media Baja
- 5 Media
- 6 Media
- 7 Media Alta
- 8 Media Alta
- 9 Alta
- 10 Alta

|\_\_| 14101

**Por favor, anote el tiempo transcurrido de la entrevista hasta este momento** |\_\_\_\_\_| 14201

## G. AFRONTAMIENTO (SOC)

### Código en caso de ausencia de respuesta:

Por favor complete cada ítem con el número de opción o respuesta apropiados. En caso de ausencia de respuesta utilice el código 99 seguido de alguna de las especificaciones siguientes.

1. No puede responder por trastorno cognitivo
2. No puede hacerlo por limitaciones físicas
3. Se niega
4. No es apropiado
5. Desconoce la respuesta
6. Otro

A continuación hay una serie de preguntas sobre varios aspectos de la vida. Cada pregunta tiene siete respuestas posibles. Por favor, indique el número que mejor exprese su respuesta. Los números uno y siete indican las respuestas extremas. Si las palabras que aparecen debajo del uno son ciertas en su caso, haga un círculo alrededor del uno. Si las palabras que aparecen debajo del siete son ciertas en su caso, haga un círculo alrededor del siete. Si su parecer es diferente, indique el número que mejor encaje con su idea de la pregunta. Por favor, de sólo una respuesta por cada pregunta.

**Por favor considere el estado cognitivo del participante durante la administración de esta prueba, así como el posible efecto emocional de algunas de las preguntas. Repita después de cada pregunta la parte subrayada del encabezado relativa a los niveles de respuesta y muestre al participante los distintos niveles en el cuadernillo señalándolos con un bolígrafo. Si lo considera necesario, repita la pregunta, pero no la reformule con intención aclaratoria. Si el participante no da muestras de comprender los tres primeros ítems pase a la sección siguiente. La administración de esta sección es opcional para los grupos de investigación**

**143.** ¿Tiene la impresión de que a Vd. no le importan de verdad las cosas que pasan a su alrededor?

|                          |       |                     |   |   |   |   |   |                 |
|--------------------------|-------|---------------------|---|---|---|---|---|-----------------|
| <input type="checkbox"/> | 14301 | 1                   | 2 | 3 | 4 | 5 | 6 | 7               |
|                          |       | rara vez<br>o nunca |   |   |   |   |   | muy a<br>menudo |

**144.** ¿Le ha sorprendido alguna vez lo que han hecho personas que Vd. creía que conocía bien?

|                          |       |                       |   |   |   |   |   |                    |
|--------------------------|-------|-----------------------|---|---|---|---|---|--------------------|
| <input type="checkbox"/> | 14401 | 1                     | 2 | 3 | 4 | 5 | 6 | 7                  |
|                          |       | nunca me<br>ha pasado |   |   |   |   |   | siempre<br>me pasa |

**145.** ¿Le ha pasado alguna vez que personas con las que contaba le hayan defraudado?

|                          |       |                       |   |   |   |   |   |                    |
|--------------------------|-------|-----------------------|---|---|---|---|---|--------------------|
| <input type="checkbox"/> | 14501 | 1                     | 2 | 3 | 4 | 5 | 6 | 7                  |
|                          |       | nunca me<br>ha pasado |   |   |   |   |   | siempre<br>me pasa |

**146.** Hasta ahora su vida:

|                          |       |                                                               |   |   |   |   |   |                                                 |
|--------------------------|-------|---------------------------------------------------------------|---|---|---|---|---|-------------------------------------------------|
| <input type="checkbox"/> | 14601 | 1                                                             | 2 | 3 | 4 | 5 | 6 | 7                                               |
|                          |       | no ha tenido<br>en absoluto<br>objetivos<br>o metas<br>claras |   |   |   |   |   | ha tenido<br>objetivos<br>y metas muy<br>claras |

**147.** ¿Tiene Vd. la impresión de que le están tratando de forma injusta?

|                          |       |                 |   |   |   |   |   |                     |
|--------------------------|-------|-----------------|---|---|---|---|---|---------------------|
| <input type="checkbox"/> | 14701 | 1               | 2 | 3 | 4 | 5 | 6 | 7                   |
|                          |       | muy a<br>menudo |   |   |   |   |   | rara vez<br>o nunca |

**148.** ¿Tiene Vd. la impresión de estar en una situación a la que no está acostumbrado/a y no sabe qué hacer?

|                          |       |                 |   |   |   |   |   |                     |
|--------------------------|-------|-----------------|---|---|---|---|---|---------------------|
| <input type="checkbox"/> | 14801 | 1               | 2 | 3 | 4 | 5 | 6 | 7                   |
|                          |       | muy a<br>menudo |   |   |   |   |   | rara vez<br>o nunca |

**149.** Hacer las cosas de todos los días:

|                          |       |                                                     |   |   |   |   |   |                                       |
|--------------------------|-------|-----------------------------------------------------|---|---|---|---|---|---------------------------------------|
| <input type="checkbox"/> | 14901 | 1                                                   | 2 | 3 | 4 | 5 | 6 | 7                                     |
|                          |       | me produce<br>una<br>gran alegría y<br>satisfacción |   |   |   |   |   | me produce<br>dolor y<br>aburrimiento |

**150.** ¿Tiene Vd. sentimientos o ideas muy confusas?

|                          |       |                 |   |   |   |   |   |                     |
|--------------------------|-------|-----------------|---|---|---|---|---|---------------------|
| <input type="checkbox"/> | 15001 | 1               | 2 | 3 | 4 | 5 | 6 | 7                   |
|                          |       | muy a<br>menudo |   |   |   |   |   | rara vez<br>o nunca |

**151.** ¿Le ocurre que tiene sentimientos que preferiría no tener?

|                          |       |                 |   |   |   |   |   |                     |
|--------------------------|-------|-----------------|---|---|---|---|---|---------------------|
| <input type="checkbox"/> | 15101 | 1               | 2 | 3 | 4 | 5 | 6 | 7                   |
|                          |       | muy a<br>menudo |   |   |   |   |   | rara vez<br>o nunca |

**152.** Muchas personas, hasta los que tienen un carácter fuerte, se sienten a veces desgraciados. ¿Cuántas veces se ha sentido Vd. así en su vida?

|    |       |       |   |   |   |   |   |              |
|----|-------|-------|---|---|---|---|---|--------------|
| __ | 15201 | 1     | 2 | 3 | 4 | 5 | 6 | 7            |
|    |       | nunca |   |   |   |   |   | muy a menudo |

**153.** Cuando algo le ha pasado, al final ha visto Vd. que:

|    |       |                                                          |   |   |   |   |   |                                         |
|----|-------|----------------------------------------------------------|---|---|---|---|---|-----------------------------------------|
| __ | 15301 | 1                                                        | 2 | 3 | 4 | 5 | 6 | 7                                       |
|    |       | le dio más importancia o menos de la que en verdad tenía |   |   |   |   |   | le dio a las cosas la importancia justa |

**154.** ¿Cuántas veces tiene la impresión de que las cosas que hace todos los días significan muy poco o tienen poca importancia?

|    |       |              |   |   |   |   |   |                  |
|----|-------|--------------|---|---|---|---|---|------------------|
| __ | 15401 | 1            | 2 | 3 | 4 | 5 | 6 | 7                |
|    |       | muy a menudo |   |   |   |   |   | rara vez o nunca |

**155.** ¿Cuántas veces tiene la impresión de no estar seguro/a de poder controlarse?

|    |       |              |   |   |   |   |   |                  |
|----|-------|--------------|---|---|---|---|---|------------------|
| __ | 15501 | 1            | 2 | 3 | 4 | 5 | 6 | 6                |
|    |       | muy a menudo |   |   |   |   |   | rara vez o nunca |

**156.** Ahora voy a leerle unas frases sobre distintas formas de ser. Por favor indíqueme si cada una de estas frases le describe a Vd. eligiendo para cada una alguna de las opciones siguientes:

- 1 En total desacuerdo
- 2 En desacuerdo
- 3 Neutral
- 4 De acuerdo
- 5 Totalmente de acuerdo

**156.a** No soy una persona que se preocupe mucho

|\_\_| 15601

**156.b** Rara vez me excedo en algo

|\_\_| 15603

**156.c** Soy una persona apacible

|\_\_| 15603

**156.d** Me cuesta resistirme a mis deseos

|\_\_| 15604

**Por favor, anote el tiempo empleado en esta sección** |\_\_\_\_\_| 15605

## H. CARGA DEL CUIDADOR (Zarit)

### Código en caso de ausencia de respuesta:

Por favor complete cada ítem con el número de opción o respuesta apropiados. En caso de ausencia de respuesta utilice el código 99 seguido de alguna de las especificaciones siguientes.

1. No puede responder por trastorno cognitivo
2. No puede hacerlo por limitaciones físicas
3. Se niega
4. No es apropiado
5. Desconoce la respuesta
6. Otro

A continuación se presenta una lista de preguntas que refleja como la gente se siente a veces cuando cuida a otra persona. Después de cada pregunta indique con qué frecuencia se siente de esa forma: nunca, casi nunca, a veces, bastantes veces o casi siempre. No hay preguntas correctas o incorrectas.

- 1 Nunca
- 2 Casi nunca
- 3 A veces
- 4 Bastantes veces
- 5 Casi siempre

**Por favor considere el posible efecto emocional de algunas de las preguntas de esta prueba. Si fuera necesario procure que el participante no se encuentre presente durante la administración de esta sección o sugiera al cuidador la contestación de esta prueba de forma auto-administrada a objeto de preservar la fiabilidad de la escala**

- |                                                                                                                      |    |       |
|----------------------------------------------------------------------------------------------------------------------|----|-------|
| 157.¿Siente que su familiar solicita más ayuda de la que realmente necesita?                                         | __ | 15701 |
| 158.¿Siente que debido al tiempo que dedica a su familiar ya no dispone de tiempo suficiente para usted?             | __ | 15801 |
| 159.¿Se siente tenso cuando tiene que cuidar a su familiar y atender además otras responsabilidades?                 | __ | 15901 |
| 160.¿Se siente avergonzado por la conducta de su familiar?                                                           | __ | 16001 |
| 161.¿Cree que la situación actual afecta de manera negativa a su relación con amigos y otros miembros de su familia? | __ | 16101 |
| 162.¿Siente temor por el futuro que le espera a su familia?                                                          | __ | 16201 |
| 163.¿Siente que su familiar depende de usted?                                                                        | __ | 16301 |
| 164.¿Se siente agotado cuando tiene que estar junto a su familiar?                                                   | __ | 16401 |
| 165.¿Siente que su salud se ha resentido por cuidar a su familiar?                                                   | __ | 16501 |
| 166.¿Siente que no tiene la vida privada que desearía debido a su familiar?                                          | __ | 16601 |
| 167.¿Cree que sus relaciones sociales se han visto afectadas por tener que cuidar de su familiar?                    | __ | 16701 |
| 168.¿Se siente incómodo al invitar amigos a casa, por su familiar?                                                   | __ | 16801 |
| 169.¿Cree que su familiar espera que usted le cuide, como si fuera la única persona con la que puede contar?         | __ | 16901 |
| 170.¿Cree que no dispone de dinero suficiente para cuidar a su familiar además de sus otros gastos?                  | __ | 17001 |
| 171.¿Siente que será incapaz de cuidar a su familiar por mucho más tiempo?                                           | __ | 17101 |
| 172.¿Siente que ha perdido el control sobre su vida desde que la enfermedad de su familiar se manifestó?             | __ | 17201 |
| 173.¿Desearía poder encargarse del cuidado de su familiar a otras personas?                                          | __ | 17301 |
| 174.¿Se siente inseguro acerca de lo que debe hacer con su familiar?                                                 | __ | 17401 |
| 175.¿Siente que debería hacer más de lo que hace por su familiar?                                                    | __ | 17501 |
| 176.¿Cree que podría cuidar de su familiar mejor de lo que lo hace?                                                  | __ | 17601 |
| 177.En general: ¿Se siente muy sobrecargado por tener que cuidar de su familiar?                                     | __ | 17701 |

**Por favor, anote el tiempo empleado en esta sección** |\_\_\_\_| 17801

## I. AFRONTAMIENTO DEL CUIDADOR (ISPE)

### Código en caso de ausencia de respuesta:

Por favor complete cada ítem con el número de opción o respuesta apropiados. En caso de ausencia de respuesta utilice el código 99 seguido de alguna de las especificaciones siguientes.

1. No puede responder por trastorno cognitivo
2. No puede hacerlo por limitaciones físicas
3. Se niega
4. No es apropiado
5. Desconoce la respuesta
6. Otro

Las preguntas que figuran a continuación se refieren a una serie de situaciones a las que frecuentemente se enfrentan los cuidadores de personas mayores. Puede ser que usted se encuentre en alguna de estas situaciones y en otras no. A medida que le vaya planteando cada una de ellas quiero que me diga si en la actualidad la situación planteada está presente y si le produce algún malestar. De ser así le pediré que me indique en qué grado:

- 0 No presente/Nada de Malestar
- 1 Algo de malestar
- 2 Bastante malestar
- 3 Mucho malestar

**Por favor considere el posible efecto emocional de algunas de las preguntas de esta prueba. Si fuera necesario procure que el participante no se encuentre presente durante la administración de esta sección o sugiera al cuidador la contestación de esta prueba de forma auto-administrada a objeto de preservar la fiabilidad de la escala. La administración de esta sección es opcional para los grupos de investigación**

- 179.** ¿El enfermo no le reconoce o no reconoce a otros seres queridos?  | 17901
- 180.** ¿Le repite continuamente las mismas cosas?, ¿Le hace la misma pregunta repetidamente?  | 18001
- 181.** ¿Se desorienta el enfermo en lugares conocidos o poco conocidos, y no sabe el mes, día u hora en que estamos?  | 18101
- 182.** ¿Siente que no puede comunicarse con el enfermo como antes?
- 183.** ¿El enfermo reconoce que tiene algún tipo de problema, por ejemplo, fallos de memoria, o por el contrario dice que no le ocurre nada, que son los demás los responsables de todo lo malo que le pasa?  | 18201
- 184.** ¿Hay momentos en que el enfermo se muestra alterado, inquieto o irritable?  | 18301
- 185.** ¿Hay momentos en que el enfermo se muestra apático, aislado, sin ganas de hacer nada?  | 18401
- 186.** ¿El enfermo ha dejado de controlar sus esfínteres?  | 18501
- 187.** Le plantea el enfermo problemas a la hora de comer (p.ej., tirar la comida, no querer comer) o a la hora de afeitarse (no dejar que el cuidador lo asee, tener que estar pendiente de él para que lo haga, ...)?  | 18601
- 188.** ¿Tiene la sensación de que a veces el enfermo hace las cosas por fastidiar, deliberadamente, como siendo en parte consciente, sobre todo en cosas que realmente le molestan (p.ej., cada vez que le ve que va a salir el enfermo dice que le duele algo), interpretándolo Vd. como que lo hace para que no salga a la calle y incomodarle?  | 18701
- 189.** ¿Tiene la sensación de no tener a nadie a quién le pueda contar como se siente, con quién pueda descargarse emocionalmente?  | 18801

**Por favor, anote el tiempo empleado en esta sección** |  | 18901

**190.** Este cuaderno B ha sido contestada por:

- 1 Por el participante
- 2 Por un familiar o amigo, especificar \_\_\_\_\_ 19001  
*1: Esposo/a, Pareja; 2: Padre/Madre, Suegro/Suegra; 3: Hijo/a; 4: Yerno, Nuera; 5: Nieto/a; 6: Hermano/a, Cuñado/a; 7: Otro Familiar; 8: Empleado/a de hogar, persona de servicio; 9: Otras Personas; 10: el entrevistador*
- 3 Por el participante con la ayuda de un familiar o amigo, especificar \_\_\_\_\_ 19002  
**(En caso de que el participante haya requerido ayuda en al menos una sección)**

|\_\_| 19003

**En caso de que la entrevista haya sido contestada con la ayuda de un familiar o amigo, especificar (marque un uno en la casilla correspondiente):**

**190.a** Secciones contestadas fundamentalmente por el entrevistado (1. Si; 2. No)

|                                     |    |       |
|-------------------------------------|----|-------|
| 1 Identificación del entrevistado   | __ | 19004 |
| 1 Medidas antropométricas           | __ | 19005 |
| 1 Discapacidad (WHODAS II)          | __ | 19006 |
| 1 Calidad de vida (EuroQol)         | __ | 19007 |
| 1 Estado nutricional (MNA)          | __ | 19008 |
| 1 Factores sociales                 | __ | 19009 |
| 1 Afrontamiento (SOC)               | __ | 19010 |
| 1 Carga del cuidador (ZARIT)        | __ | 19011 |
| 1 Afrontamiento del cuidador (ISPE) | __ | 19012 |

**190.b** Secciones contestadas fundamentalmente por el familiar o amigo (1. Si; 2. No)

|                                     |    |       |
|-------------------------------------|----|-------|
| 1 Identificación del entrevistado   | __ | 19013 |
| 1 Medidas antropométricas           | __ | 19014 |
| 1 Discapacidad (WHODAS II)          | __ | 19015 |
| 1 Calidad de vida (EuroQol)         | __ | 19016 |
| 1 Estado nutricional (MNA)          | __ | 19017 |
| 1 Factores sociales                 | __ | 19018 |
| 1 Afrontamiento (SOC)               | __ | 19019 |
| 1 Carga del cuidador (ZARIT)        | __ | 19020 |
| 1 Afrontamiento del cuidador (ISPE) | __ | 19021 |

**Por favor si no obtuvo el consentimiento informado por escrito al comienzo de la entrevista obténgalo en este momento.**

**Por favor revise rápidamente el cuadernillo y cerciórese de que todas las secciones han sido cumplimentadas correctamente y todos los ítems han sido administrados o, en caso de ausencia de respuesta, han sido codificados adecuadamente.**

## J. MATERIALES ADICIONALES

*Utilice las siguientes tarjetas para la administración del WHO-DAS II*

*Tarjeta 1:*

### **"Estados de Salud":**

- Enfermedades u otros problemas de salud
- Lesiones
- Problemas mentales o emocionales (o de los nervios)
- Problemas relacionados con el alcohol
- Problemas relacionados con las drogas

### **Tener dificultades en una actividad quiere decir:**

- Aumento de esfuerzo
- Malestar o dolor
- Lentitud
- Cambios en el modo en que realiza la actividad
- Tenga en cuenta sólo los últimos 30 días

Tarjeta 2:

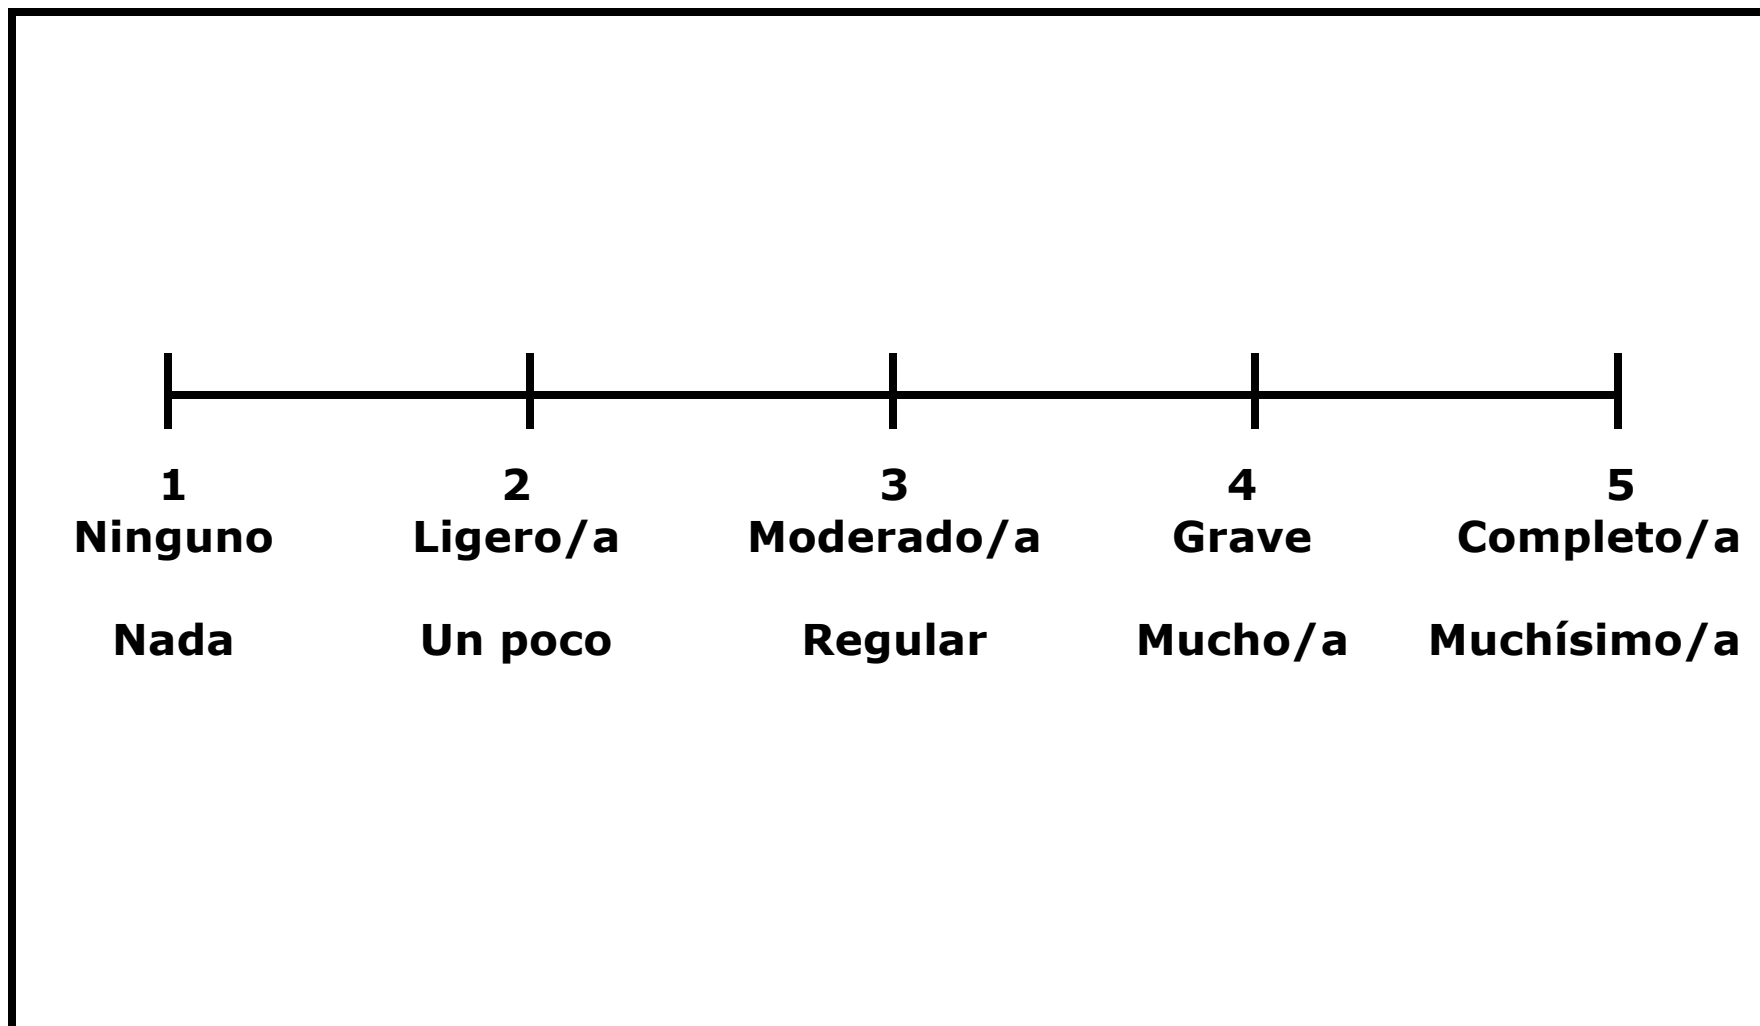



Tarjeta 3:

**A Un día**

**B Hasta una semana = De 2 a 7 días**

**C Hasta dos semanas = De 8 a 14 días**

**D Más de dos semanas = De 15 a 29 días**

**E Todos los días = 30 días**

Utilice la siguiente tarjeta para la administración del EuroQoL

Tarjeta 4:

Para ayudar a las personas a describir lo bueno o malo que es su estado de salud hemos dibujado una escala parecida a un termómetro en la cual se marca con un 100 el mejor estado de salud que pueda imaginarse y con un 0 el peor estado de salud que pueda imaginarse.

Nos gustaría que nos indicara en esta escala, en su opinión, lo bueno o malo que es su estado de salud en el día de HOY. Por favor, dibuje una línea desde el casillero donde dice "Su estado de salud hoy" (\*) hasta el punto del termómetro que en su opinión indique lo bueno o malo que es su estado de salud en el día de HOY.

**SU ESTADO DE SALUD HOY**

**El mejor estado de salud imaginable**



**El peor estado de salud imaginable**

(\*) A veces se tiende a valorar el estado de salud actual haciendo una cruz o una marca en el EVA
